# Supplementary material for: A high-resolution method to assess cell multinucleation with cytoplasm-localized fluorescent probes
Source: Royal Society of Chemistry journal article supplement (doi:10.1039/c6an00613b), 2016-01-01
Supplement: c6an00613b1.pdf [file c6an00613b1.pdf]

# A High-resolution Method to Assess Cell Multinucleation with Cytoplasm-localized Fluorescent Probes

Hui Wen<sup>a, b, ‡</sup>, Qinghua Cui<sup>c, ‡</sup>, Hui Meng<sup>c</sup>, Fangfang Lai<sup>a</sup>, Shufang Wang<sup>b</sup>, Xiang  
Zhang<sup>b</sup>, Xiaoguang Chen<sup>a</sup>, Huaqing Cui<sup>a, b, \*</sup>, and Dali Yin<sup>a, \*</sup>

*a*, State Key Laboratory of Bioactive Substances and Function of Natural Medicine, Institute of  
Materia Medica, Peking Union Medical College and Chinese Academy of Medical Sciences,  
Beijing, 100050, China;

*b*, Beijing Key Laboratory of Active Substances Discovery and Drugability Evaluation, Institute  
of Materia Medica, Peking Union Medical College and Chinese Academy of Medical Sciences,  
Beijing, 100050, China;

*c*, College of Pharmacy, Shandong University of Traditional Chinese Medicine, Jinan, 250355,  
China.

‡ HW and QC contributed equally to this project.

\* Corresponding authors

Dr. Huaqing Cui: hcui@imm.ac.cn;

Prof. Dali Yin: yindali@imm.ac.cn

# Contents

## 1, CLFP development

1.1. General information of Chemistry

1.2. Compound information ( $^1\text{H}$ ,  $^{13}\text{C}$ , HRMS)

1.3. Probe characterization (photophysical parameters, cell cytotoxicity, cell distribution, incubation concentration)

## 2, Information of NMR spectra

## 1, CLFP development

### 1.1 General information

General: All the solvents and chemicals were purchased from commercial sources: J&K® Chemical Corporation, Beijing Ouhe Reagents Corporation with a purity > 95%. Flash column chromatography was performed on Biotage Isolera one. <sup>1</sup>H NMR and <sup>13</sup>C NMR were recorded on Bruker AVANCEIII 400 spectrometer. Chemical shifts are referenced to the residual solvent peak and reported in ppm ( $\delta$  scale) and all coupling constant ( $J$ ) values are given in Hertz (Hz). The following multiplicity abbreviations are used: (s) singlet, (d) doublet, (t) triplet, (q) quartet, (m) multiplet. ESI-HRMS data were measured on Thermo Exactive Orbitrap plus spectrometer. Purity was determined using HPLC, LCMS and NMR spectroscopy. All of the synthesized compounds have the purity over than 95%.

### 1.2 Compound information (<sup>1</sup>H, <sup>13</sup>C, HRMS)

#### *Series 1, BODIPY derivatives*

We designed and synthesized 13 BODIPY derived probes, the structures of them are listed in table S1.

Table S1, The structure information of 13 BODIPY derived CLFPs.

| No | STRUCTURE                                                                           | No | STRUCTURE                                                                             |
|----|-------------------------------------------------------------------------------------|----|---------------------------------------------------------------------------------------|
| B1 | 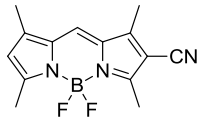 | B2 |  |
| B3 |  | B4 |   |
| B5 |  | B6 |   |

|     |  |     |  |
|-----|--|-----|--|
| B7  |  | B8  |  |
| B9  |  | B10 |  |
| B11 |  | B12 |  |
| B13 |  |     |  |

Synthesis protocol and compound characterization ( $^1\text{H NMR}$ ,  $^{13}\text{C NMR}$  and HRMS) <sup>1,2</sup>

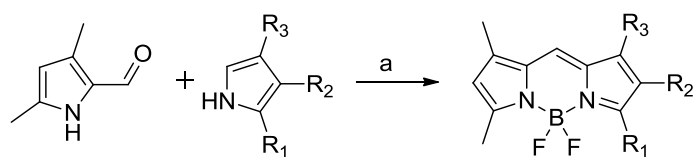

Scheme S1, Synthesis of B1-B4. (a)  $\text{POCl}_3$ , DCM; TEA,  $\text{BF}_3 \cdot \text{Et}_2\text{O}$ , DCM

B1

3-Carbonitrile-4, 4-difluoro-1, 3, 5, 7-tetramethyl-4-bora-3a, 4a-diaza-s-indacene

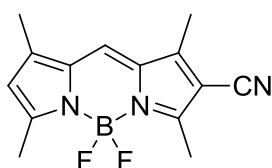

3, 5-dimethyl-pyrrole-2-carbaldehyde (100mg, 0.81mmol) and 2,4-dimethyl-pyrrole-3-carbonitrile (89mg, 0.74mmol) were dissolved in dry DCM (15 mL), the reaction mixture cooled to 0 °C and stirred for 10 min under argon atmosphere, then POCl<sub>3</sub> (124mg, 0.81mmol) was slowly added in 5 mins. The reaction mixture was stirred at 0 °C for 1h, then another 4h at 25 °C. Dry TEA (750mg, 7.4 mmol) was added, and after 15 min BF<sub>3</sub> Et<sub>2</sub>O (0.93ml, 7.4 mmol) was added. After 2 h, the reaction mixture was evaporated in vacuum, and was extracted by EtOAc (200 mL), then washed with H<sub>2</sub>O (3 × 50 mL) and dried by Na<sub>2</sub>SO<sub>4</sub>. The crude product was purified by silica gel column chromatography (hexane/EtOAc 5:1) to yield 99 mg (49%) of B1 as red crystal.

<sup>1</sup>H NMR (400MHz, CDCl<sub>3</sub>): δ = 2.30 (s, 3H), 2.36 (s, 3H), 2.59 (s, 3H), 2.62 (s, 3H), 6.23(s, 1H), 7.13 (s, 1H). <sup>13</sup>C NMR (101MHz, CDCl<sub>3</sub>): δ = 10.58, 11.49, 13.34, 15.29, 100.97, 114.89, 121.27, 122.39, 130.18, 136.81, 140.54, 146.31, 155.37, 164.63. HRMS (ESI): m/z [M + H]<sup>+</sup> calculated for C<sub>14</sub>H<sub>15</sub>N<sub>3</sub>BF<sub>2</sub>: 274.13216; found: 274.13153

## B2

4, 4-Difluoro-1,3,5,7-tetramethyl-4-bora-3a,4a-diaza-s-indacene

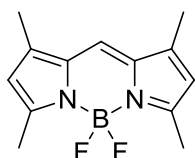

B2 (109 mg, 60%) was obtained from 3, 5-dimethyl-pyrrole-2-carbaldehyde (100mg, 0.81mmol) and 2, 4-dimethyl-pyrrole (70 mg, 0.74mmol) as red powder.

<sup>1</sup>H NMR (400MHz, CDCl<sub>3</sub>): δ = 2.24 (s, 6H), 2.53 (s, 6H), 6.04 (s, 2H), 7.04 (s, 1H). <sup>13</sup>C NMR (101MHz, CDCl<sub>3</sub>): δ = 11.27 (2C), 14.66 (2C), 119.01 (2C), 120.08, 133.40 (2C), 141.20 (2C), 156.71 (2C). HRMS (ESI): m/z [M + H]<sup>+</sup> calculated for C<sub>13</sub>H<sub>16</sub>N<sub>2</sub>BF<sub>2</sub>: 249.13691; found: 249.13643

## B3

2, 2, 2-Trichloroethyl-2-(4, 4-difluoro-5,7-dimethyl-4-bora-3a,4a-diaza-s-indacene-3-yl)acetate

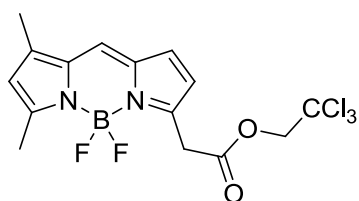

B3 (63mg, 21%) was obtained from 3, 5-dimethyl-pyrrole-2-carbaldehyde (100mg, 0.81mmol) and 2,2,2-trichloroethyl-2-(pyrrol-2-yl) acetate (188mg, 0.74mmol) as red powder.

$^1\text{H}$  NMR (400MHz,  $\text{CDCl}_3$ ):  $\delta$  = 2.25 (s, 3H), 2.57 (s, 3H), 4.18 (s, 2H), 4.81 (s, 2H), 6.14 (s, 1H), 6.48 (d,  $J$  = 4.0Hz, 1H), 6.90 (d,  $J$  = 4.0Hz, 1H), 7.13 (s, 1H).  $^{13}\text{C}$  NMR (101MHz,  $\text{CDCl}_3$ ):  $\delta$  = 11.35, 15.08, 33.86, 74.37, 94.74, 117.75, 121.12, 124.30, 127.28, 133.03, 136.01, 145.16, 146.98, 162.29, 168.12. HRMS (ESI):  $m/z$   $[\text{M} + \text{H}]^+$  calculated for  $\text{C}_{15}\text{H}_{15}\text{O}_2\text{N}_2\text{BF}_2\text{Cl}_3$ : 409.02547; found: 409.02542

B4

2-Ethyl-4, 4-difluoro-1, 3, 5, 7-tetramethyl-4-bora-3a, 4a-diaza-s-indacene

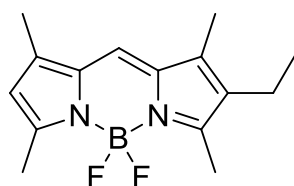

B4 (83 mg, 41%) was obtained from 3, 5-dimethyl-pyrrole-2-carbaldehyde (100 mg, 0.81 mmol) and 3-ethyl-2,4-dimethyl-pyrrole (91mg, 0.74 mmol) as green crystal.

$^1\text{H}$  NMR (400MHz,  $\text{CDCl}_3$ ):  $\delta$  = 1.07 (t,  $J$  = 8.0Hz, 3H), 2.17 (s, 3H), 2.23 (s, 3H), 2.39 (q,  $J$  = 8.0Hz, 2H), 2.51 (s, 6H), 6.00 (s, 1H), 6.99 (s, 1H).  $^{13}\text{C}$  NMR (101MHz,  $\text{CDCl}_3$ ):  $\delta$  = 9.41, 11.23, 12.68, 14.50, 14.55, 17.28, 118.23, 119.26, 132.41, 132.79, 133.05, 137.64, 139.89, 155.09, 156.48. HRMS (ESI):  $m/z$   $[\text{M} + \text{H}]^+$  calculated for  $\text{C}_{15}\text{H}_{20}\text{N}_2\text{BF}_2$ : 277.16821; found: 277.16763

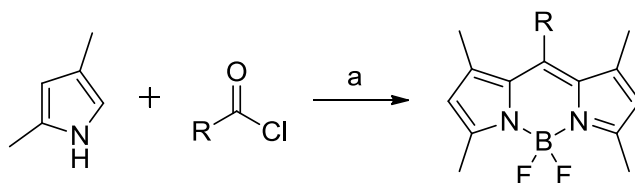

Scheme S2: Synthesis of B5-B9 (a) TEA, BF<sub>3</sub> Et<sub>2</sub>O, DCM

B5

8-(Dec-9-yn-1-yl)-4,4-difluoro-1,3,5,7-tetramethyl-4-bora-3a,4a-diaza-s-indacene

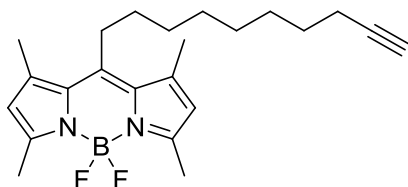

2,4-Dimethyl-pyrrole (200 mg, 2.1 mmol) were dissolved in dry DCM (30 mL), undec-10-ynoyl chloride (210 mg, 1.05 mmol) was added under argon atmosphere at 25 °C. Then the reaction mixture was heated at 50 °C and stirred for 2h, and cooled to 25 °C. The solution was evaporated in vacuum, dry toluene (30 mL) and dry DCM (5 mL) was added to reaction mixture. After the reaction mixture was stirred for 5 min at 25 °C, dry TEA (505mg, 5mmol) was added at 25 °C, and after 15mins BF<sub>3</sub>•Et<sub>2</sub>O (760mg, 5mmol) was added by dropwise. The reaction mixture was heated to 50 °C for 1 h. The reaction mixture was evaporated in vacuum, and was extracted by EtOAc (300 mL), then washed with H<sub>2</sub>O (3×50mL) and dried by Na<sub>2</sub>SO<sub>4</sub>. The crude product was purified by silica gel column chromatography (hexane/DCM 2:1) to yield 15 mg (3.7%) of B5 as red powder.

<sup>1</sup>H NMR (400MHz, CDCl<sub>3</sub>): δ = 1.32-1.44 (m, 6H), 1.45-1.56 (m, 4H), 1.59-1.67 (m, 2H), 1.94 (s, 1H), 2.17-2.21 (m, 2H), 2.41(s, 6H), 2.51(s, 6H), 2.91-2.95 (m, 2H), 6.05(s, 2H). <sup>13</sup>C NMR (101MHz, CDCl<sub>3</sub>): δ = 14.44 (2C), 16.39 (2C), 18.37, 28.41, 28.47, 28.62, 29.02, 29.27, 30.32, 31.89, 68.17, 84.64, 121.56 (2C), 131.44, 140.27 (2C), 146.62(2C), 153.74 (2C). HRMS (ESI): m/z [M + H]<sup>+</sup> calculated for C<sub>23</sub>H<sub>32</sub>N<sub>2</sub>BF<sub>2</sub>: 385.26211; found: 385.26135

B6

4,4-Difluoro-8-(hex-5-yn-1-yl)-1,3,5,7-tetramethyl-4-bora-3a,4a-diaza-s-indacene

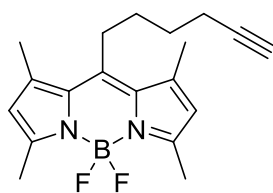

B6 (25 mg, 7.2%) was obtained from hept-6-ynoyl chloride (151mg, 1.05mmol) and 2,4-dimethyl-pyrrole (200mg, 2.1mmol) as red powder.

$^1\text{H}$  NMR (400MHz,  $\text{CDCl}_3$ ):  $\delta$  = 1.71-1.80 (m, 4H), 1.96 (s, 1H), 2.26-2.29 (m, 2H), 2.43(s, 6H), 2.52(s, 6H), 2.95-2.99(m, 2H), 6.06(s, 2H).  $^{13}\text{C}$  NMR (101MHz,  $\text{CDCl}_3$ ):  $\delta$  = 14.46 (2C), 16.39 (2C), 18.26, 27.94, 28.96, 30.70, 69.05, 83.66, 121.67 (2C), 131.42, 140.30 (2C), 145.85(2C), 153.95 (2C). HRMS (ESI) :  $m/z$   $[\text{M} + \text{H}]^+$  calculated for  $\text{C}_{19}\text{H}_{24}\text{N}_2\text{BF}_2$ : 329.19951; found: 329.19904

B7

8-(Chloropropyl)-4,4-difluoro-1,3,5,7-tetramethyl-4-bora-3a,4a-diaza-s-indacene

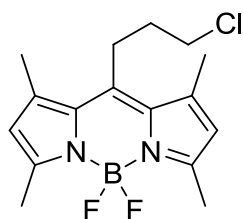

B7 (30 mg, 8.7%) was obtained from 4-chlorobutanoyl chloride (147 mg, 1.05 mmol) and 2,4-dimethyl-pyrrole (200 mg, 2.1 mmol) as red powder.

$^1\text{H}$  NMR (400MHz,  $\text{CDCl}_3$ ):  $\delta$  = 2.05-2.12 (m, 2H), 2.44 (s, 6H), 2.52 (s, 6H), 3.11-3.16 (m, 2H), 3.70 (t,  $J$  = 8.0Hz, 2H), 6.06 (s, 2H).  $^{13}\text{C}$  NMR (101MHz,  $\text{CDCl}_3$ ):  $\delta$  = 14.48 (2C), 16.60 (2C), 25.95, 34.03, 44.75, 121.86 (2C), 131.43, 140.33 (2C), 144.43(2C), 154.37 (2C). HRMS (ESI):  $m/z$   $[\text{M} + \text{H}]^+$  calculated for  $\text{C}_{16}\text{H}_{21}\text{N}_2\text{BClF}_2$ : 325.14489; found: 325.14423

B8

8-[4-(Chloromethyl)phenyl]-4,4-difluoro-1,3,5,7-tetramethyl-4-bora-3a,4a-diaza-s-indacene



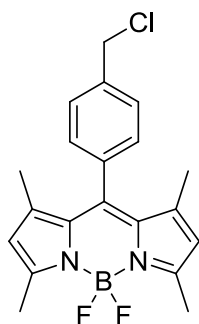

B8 (351 mg, 17.8%) was obtained from 4-(chloromethyl)benzoyl chloride (1.0 g, 5.32 mmol) and 2,4-dimethyl-pyrrole (1.01 g, 10.6 mmol) as red powder.

$^1\text{H}$  NMR (400MHz,  $\text{CDCl}_3$ ):  $\delta$  = 1.38 (s, 6H), 2.55 (s, 6H), 4.66 (s, 2H), 5.98 (s, 2H), 7.29 (d,  $J$  = 8.0Hz, 2H), 7.52 (d,  $J$  = 8.0Hz, 2H).  $^{13}\text{C}$  NMR (101MHz,  $\text{CDCl}_3$ ):  $\delta$  = 14.47 (2C), 14.59 (2C), 45.61, 121.34 (2C), 128.42 (2C), 129.26(2C), 131.32, 135.09(2C), 138.60(2C), 140.94, 143.03, 155.67 (2C). HRMS (ESI):  $m/z$   $[\text{M} + \text{H}]^+$  calculated for  $\text{C}_{20}\text{H}_{21}\text{N}_2\text{BClF}_2$ : 373.14489; found: 373.14429

B9

4, 4-Difluoro-8-methyl-1, 3, 5, 7-tetramethyl-4-bora-3a, 4a-diaza-s-indacene

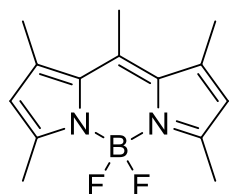

B9 (50 mg, 18.4%) was obtained from acetyl chloride (82 mg, 1.05 mmol) and 2, 4-dimethyl-pyrrole (200 mg, 2.1 mmol) as red powder.

$^1\text{H}$  NMR (400MHz,  $\text{CDCl}_3$ ):  $\delta$  = 2.40 (s, 6H), 2.51 (s, 6H), 2.56 (s, 3H), 6.05 (s, 2H).  $^{13}\text{C}$  NMR (101MHz,  $\text{CDCl}_3$ ):  $\delta$  = 14.42 (2C), 16.37, 17.32 (2C), 121.22 (2C), 132.06, 140.99 (2C), 141.42 (2C), 153.60 (2C). HRMS (ESI):  $m/z$   $[\text{M} + \text{H}]^+$  calculated for  $\text{C}_{14}\text{H}_{18}\text{N}_2\text{BF}_2$ : 263.15256; found: 263.15210

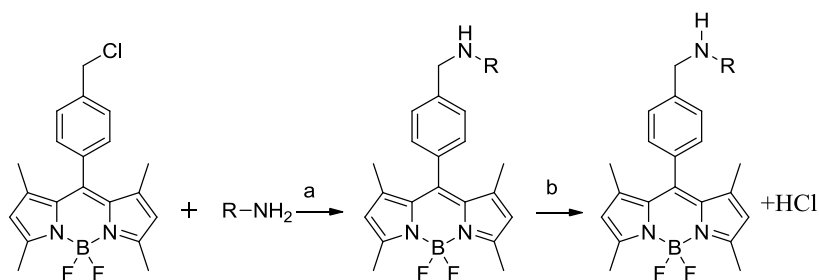

Scheme S3: Synthesis of B10-B13. (a)  $\text{Cs}_2\text{CO}_3$ , KI,  $\text{CH}_3\text{CN}$ ; (b) HCl, DCM

## B10

8-[4-((decylamino)methyl)phenyl]-4,4-difluoro-1,3,5,7-tetramethyl-4-bora-3a,4a-diaza-s-indacene

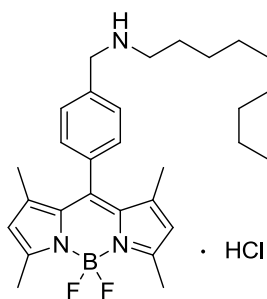

8-[4-(chloromethyl)phenyl]-4,4-difluoro-1,3,5,7-tetramethyl-4-bora-3a,4a-diaza-s-indacene (B8) (50mg, 0.13mmol),  $\text{Cs}_2\text{CO}_3$  (87 mg, 0.26 mmol) and KI (45 mg, 0.26 mmol) were dissolved in dry  $\text{CH}_3\text{CN}$  (30mL), decan-1-amine (210mg, 1.3mmol) was added under argon atmosphere at 25 °C. Then the reaction mixture was heated at 80 °C and stirred for 2 h, and cooled to 25 °C. The reaction mixture was evaporated in vacuum, and was extracted by EtOAc (200 mL), then washed with  $\text{H}_2\text{O}$  (3×50mL) and dried by  $\text{Na}_2\text{SO}_4$ . The crude product was purified by silica gel column chromatography (DCM/ $\text{CH}_3\text{OH}$  50:1). The HCl salt of B10 was obtained by using a solution of HCl in DCM, and yielded 50 mg (70%) as red powder.

$^1\text{H}$  NMR (400 MHz,  $\text{CDCl}_3$ ):  $\delta$  = 0.86 (br, 3H), 1.22-1.27 (m, 14H), 1.35 (s, 6H), 1.89 (br, 2H), 2.55 (s, 6H), 2.76 (br, 2H), 4.29 (br, 2H), 5.97 (s, 2H), 7.38 (d,  $J$  = 4.0Hz, 2H), 7.80 (d,  $J$  = 4.0Hz, 2H), 10.14 (br, NH-HCl, 2H).  $^{13}\text{C}$  NMR (101MHz,  $\text{CDCl}_3$ ):  $\delta$  = 14.10, 14.52 (2C), 14.62 (2C), 22.66, 26.03, 26.87, 28.98, 29.25, 29.44, 29.46, 31.86, 45.53, 49.89, 121.51 (2C), 129.24

(2C), 130.98 (2C), 131.05, 131.16 (2C), 136.60, 140.18, 142.64 (2C), 155.97 (2C). HRMS (ESI) : m/z [M + H]<sup>+</sup> calculated for C<sub>30</sub>H<sub>43</sub>N<sub>3</sub>BF<sub>2</sub>: 494.35126; found: 494.35129

### B11

8-[4-((hexylamino)methyl)phenyl]-4,4-difluoro-1,3,5,7-tetramethyl-4-bora-3a,4a-diaza-s-indacene

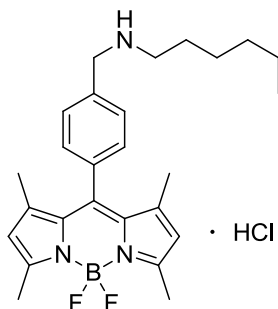

B11 (+HCl) (80 mg, 90%) was obtained from 8-[4-(chloromethyl)phenyl]-4,4-difluoro-1,3,5,7-tetramethyl-4-bora-3a,4a-diaza-s-indacene (B8) (70 mg, 0.19 mmol) and hexan-1-amine (190 mg, 1.9 mmol) as red powder.

<sup>1</sup>H NMR (400MHz, CDCl<sub>3</sub>): δ = 0.84 (t, *J* = 8.0Hz, 3H), 1.26-1.30 (m, 6H), 1.35 (s, 6H), 1.90(br, 2H), 2.55 (s, 6H), 2.76 (br, 2H), 4.29 (br, 2H), 5.98 (s, 2H), 7.39 (d, *J* = 8.0Hz, 2H), 7.81 (d, *J* = 8.0Hz, 2H), 10.13 (br, NH-HCl, 2H). <sup>13</sup>C NMR (101MHz, CDCl<sub>3</sub>): δ = 13.90, 14.51 (2C), 14.62 (2C), 22.41, 25.93, 26.48, 31.05, 45.52, 49.91, 121.52 (2C), 129.25 (2C), 130.97 (2C), 131.04, 131.16 (2C), 136.60, 140.18, 142.65 (2C), 155.97 (2C). HRMS (ESI): m/z [M + H]<sup>+</sup> calculated for C<sub>26</sub>H<sub>35</sub>N<sub>3</sub>BF<sub>2</sub>: 438.28866; found: 438.28851

### B12

8-[4-((dodecylamino)methyl)phenyl]-4,4-difluoro-1,3,5,7-tetramethyl-4-bora-3a,4a-diaza-s-indacene

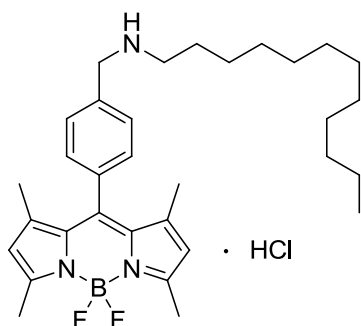

B12 (+HCl) (70 mg, 93%) was obtained from 8-[4-(chloromethyl)phenyl]-4,4-difluoro-1,3,5,7-tetramethyl-4-bora-3a,4a-diaza-s-indacene (B8) (50 mg, 0.13 mmol) and dodecan-1-amine (248 mg, 1.3 mmol) as red powder.

$^1\text{H}$  NMR (400MHz,  $\text{CDCl}_3$ ):  $\delta$  = 0.87 (t,  $J$  = 8.0Hz, 3H), 1.20-1.27 (m, 18H), 1.35 (s, 6H), 1.89 (br, 2H), 2.55 (s, 6H), 2.75 (br, 2H), 4.29 (br, 2H), 5.97 (s, 2H), 7.38 (d,  $J$  = 8.0Hz, 2H), 7.80 (d,  $J$  = 8.0Hz, 2H), 10.10 (br, NH-HCl, 2H).  $^{13}\text{C}$  NMR (101MHz,  $\text{CDCl}_3$ ):  $\delta$  = 14.12, 14.50 (2C), 14.62 (2C), 22.69, 25.98, 26.86, 28.98, 29.35, 29.45, 29.52, 29.60, 29.63, 31.91, 45.52, 49.87, 121.51 (2C), 129.23 (2C), 130.97 (2C), 131.05, 131.16 (2C), 136.59, 140.19, 142.64 (2C), 155.96 (2C). HRMS (ESI):  $m/z$   $[\text{M} + \text{H}]^+$  calculated for  $\text{C}_{32}\text{H}_{47}\text{N}_3\text{BF}_2$ : 522.38256; found: 522.38239

### B13

8-[4-(((10-aminodecyl)amino)methyl)phenyl]-4,4-difluoro-1,3,5,7-tetramethyl-4-bora-3a,4a-diaza-s-indacene

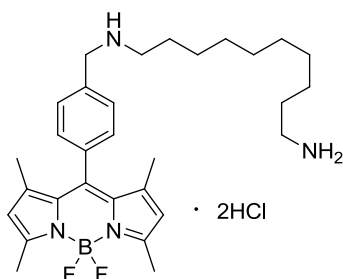

B13 (+2HCl) (80 mg, 73%) was obtained from 8-[4-(chloromethyl)phenyl]-4,4-difluoro-1,3,5,7-tetramethyl-4-bora-3a,4a-diaza-s-indacene (B8) (70 mg, 0.19 mmol) and decane-1,10-diamine (323 mg, 1.9 mmol) as red powder.

$^1\text{H}$  NMR (400MHz,  $\text{CDCl}_3$ ):  $\delta = 1.30$  (m, 12H), 1.35 (s, 6H), 1.86 (br, 4H), 2.55 (s, 6H), 2.79 (br, 2H), 3.06 (br, 2H), 4.34 (br, 2H), 5.98 (s, 2H), 7.37 (br, 2H), 7.81 (br, 2H), 8.28 (br,  $\text{NH}_2\text{-HCl}$ , 3H), 9.88 (br,  $\text{NH-HCl}$ , 2H).  $^{13}\text{C}$  NMR (101MHz,  $\text{CDCl}_3$ ):  $\delta = 14.56$  (2C), 14.63 (2C), 25.70, 25.93, 26.25, 27.15, 28.17 (3C), 29.72, 40.19, 45.77, 50.20, 121.52 (2C), 129.17 (2C), 131.12 (2C), 131.16 (3C), 136.51, 140.22, 142.66 (2C), 155.95 (2C). HRMS (ESI) :  $m/z$   $[\text{M} + \text{H}]^+$  calculated for  $\text{C}_{30}\text{H}_{44}\text{N}_4\text{BF}_2$ : 509.36216; found: 509.36160

### Series 2, Dansyl chloride derivatives

Table S2, The structure information of 20 DNS derived CLFPs

| No  | STRUCTURE | No  | STRUCTURE |
|-----|-----------|-----|-----------|
| D1  |           | D2  |           |
| D3  |           | D4  |           |
| D5  |           | D6  |           |
| D7  |           | D8  |           |
| D9  |           | D10 |           |
| D11 |           | D12 |           |
| D13 |           | D14 |           |

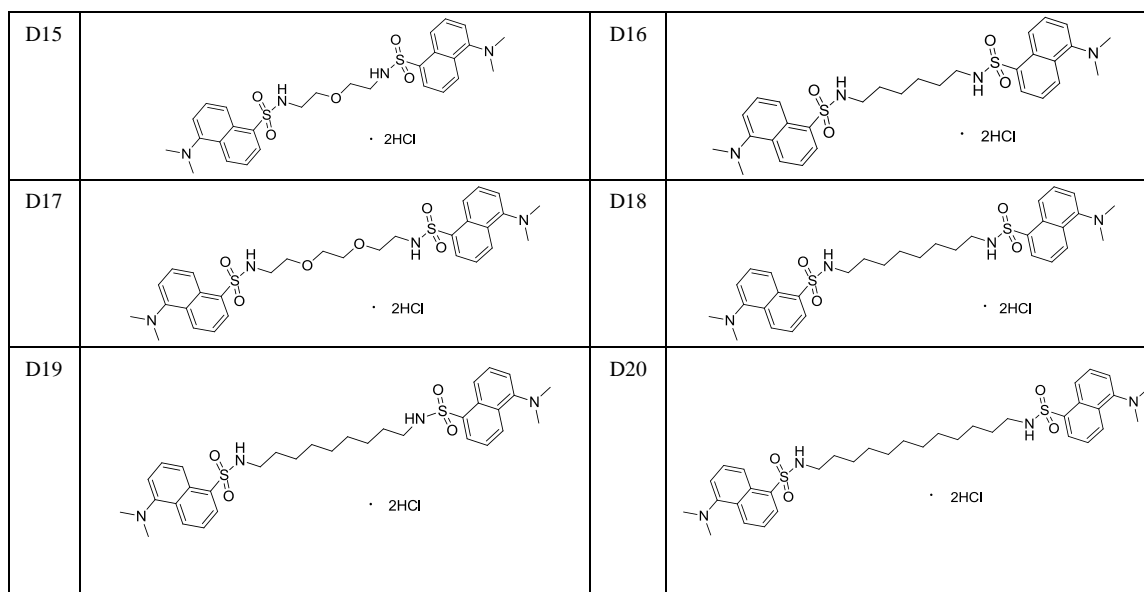

General procedure of the synthesis of 5-(dimethylamino)-naphthalene-1-sulfonamide derivatives (dansyl chloride based probes).

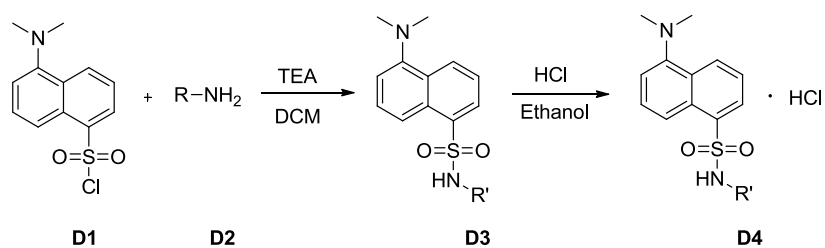

Scheme S4. Reaction conditions: a), D1 5 mmol, D2 5 mmol, TEA (10 mmol) solvent DCM (2 ml), for 2 hours; b), HCl, Ethanol (2.5 ml).

Dansyl chloride was added to a solution of alkyl amine and TEA in DCM at room temperature. The reaction mixture was kept to stir for 15h, and DCM was then evaporated. Final compound was obtained by column chromatography (MeOH/DCM). The product was kept as the HCl via re-crystallization in HCl of ethanol solution, all of the probes was produced as the form of HCl salt.

D1

5-(Dimethylamino)-*N*-propyl-naphthalene-1-sulfonamide

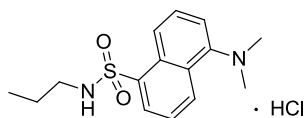

D1 (HCl-salt) (114 mg, 94%) was obtained from propylamine (22 mg, 0.37 mmol) and DNS-Cl (100mg, 0.37mmol) as white power.  $^1\text{H}$  NMR (400MHz,  $\text{CD}_3\text{OD}$ ):  $\delta = 0.76$  (t,  $J = 7.4$  Hz, 3H), 1.33-1.43 (m, 2H), 2.83 (t,  $J = 7.0$  Hz, 2H), 3.51 (s, 6H), 7.85-7.93 (m, 2H), 8.13 (d,  $J = 7.8$  Hz, 1H), 8.38 (d,  $J = 7.3$  Hz, 1H), 8.59 (d,  $J = 8.7$  Hz, 1H), 8.95 (d,  $J = 8.8$  Hz, 1H).  $^{13}\text{C}$  NMR (101MHz,  $\text{CD}_3\text{OD}$ ):  $\delta = 11.40, 24.05, 45.79, 47.81$  (2C), 120.52, 126.48, 127.25, 128.01, 128.55, 128.68, 130.74, 131.10, 139.17, 140.61. HRMS (ESI):  $m/z$   $[\text{M} + \text{H}]^+$  calculated for  $\text{C}_{15}\text{H}_{21}\text{N}_2\text{O}_2\text{S}$ : 293.13183; found: 293.13162.

D2

5-(Dimethylamino)-*N*-hexylnaphthalene-1-sulfonamide

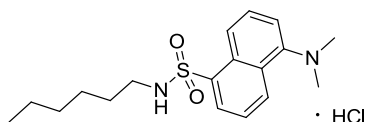

D2 (HCl-salt) (124mg, 91%) was obtained from hexylamine (37mg, 0.37mmol) and DNS-Cl (100mg, 0.37mmol) as white power.  $^1\text{H}$  NMR (400MHz,  $\text{CD}_3\text{OD}$ ):  $\delta = 0.76$  (t,  $J = 6.9$  Hz, 3H), 1.07-1.12 (m, 6H), 1.28-1.33(dd, 2H), 2.85 (t,  $J = 6.9$  Hz, 2H), 3.51 (s, 6H), 7.84-7.91 (m, 2H), 8.15 (d,  $J = 7.8$  Hz, 1H), 8.36 (d,  $J = 7.3$  Hz, 1H), 8.64 (d,  $J = 8.7$  Hz, 1H), 8.93 (d,  $J = 8.8$  Hz, 1H);  $^{13}\text{C}$  NMR (101MHz,  $\text{CD}_3\text{OD}$ ):  $\delta = 14.25, 23.43, 27.17, 30.58, 32.29, 43.91, 47.88$  (2C), 120.64, 126.56, 127.17, 128.04, 128.57, 128.77, 130.71, 131.18, 139.12, 140.44; HRMS (ESI) :  $m/z$   $[\text{M} + \text{H}]^+$  calculated for  $\text{C}_{18}\text{H}_{27}\text{N}_2\text{O}_2\text{S}$ : 335.17878; found: 335.17871.

D3

*N*-decyl-5-(dimethylamino) naphthalene-1-sulfonamide

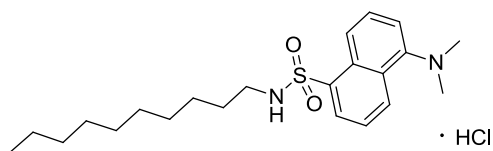

D3 (HCl-salt) (137mg, 87%) was obtained from decylamine (58mg, 0.37mmol) and DNS-Cl (100mg, 0.37mmol) as white power.  $^1\text{H}$  NMR (400MHz,  $\text{CD}_3\text{OD}$ ):  $\delta = 0.89$  (t,  $J = 6.9$  Hz, 3H), 1.12-1.36 (m, 16H), 2.87 (t,  $J = 7.0$  Hz, 2H), 3.50 (s, 6H), 7.85-7.92 (m, 2H), 8.12 (d,  $J = 7.8$  Hz,

1H), 8.38 (d,  $J = 7.3$  Hz, 1H), 8.59 (d,  $J = 8.7$  Hz, 1H), 8.94 (d,  $J = 8.7$  Hz, 1H);  $^{13}\text{C}$  NMR (101MHz,  $\text{CD}_3\text{OD}$ ):  $\delta = 14.42, 23.70, 27.54, 30.11, 30.37, 30.52, 30.57, 30.69, 33.01, 43.94, 47.76$  (2C), 120.39, 126.56, 127.35, 127.93, 128.50, 128.57, 130.77, 131.13, 139.15, 140.96. HRMS (ESI):  $m/z$  [M + H] calculated for  $\text{C}_{22}\text{H}_{35}\text{N}_2\text{O}_2\text{S}$ : 391.24138; found: 391.24127.

D4

(Z)-5-(dimethylamino)-*N*-(octadec-9-en-1-yl) naphthalene-1-sulfonamide

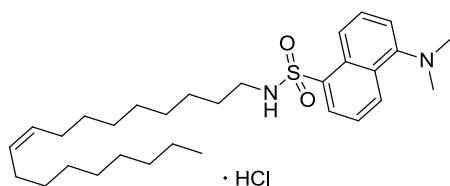

D4 (HCl-salt) (180 mg, 91%) was obtained from octadec-9-nyl amine (110mg, 0.37mmol) and DNS-Cl (100mg, 0.37 mmol) as white wax.  $^1\text{H}$  NMR (400MHz,  $\text{CD}_3\text{OD}$ ):  $\delta = 0.86$  (t,  $J = 6.6$  Hz, 3H), 1.11-1.26 (m, 26H), 1.94-2.00 (m, 2H), 2.84 (t,  $J = 6.9$  Hz, 2H), 3.48 (s, 6H), 5.28-5.35 (m, 2H), 7.82-7.91 (m, 2H), 8.10 (d,  $J = 7.5$  Hz, 1H), 8.35 (dd,  $J_1 = 7.5$  Hz,  $J_2 = 0.9$  Hz, 1H), 8.57 (d,  $J = 8.7$  Hz, 1H), 8.92 (d,  $J = 8.7$  Hz, 1H);  $^{13}\text{C}$  NMR (101MHz,  $\text{CD}_3\text{OD}$ ):  $\delta = 14.45, 23.71, 27.55, 28.11, 30.10, 30.19, 30.32, 30.40, 30.42, 30.58, 30.71, 30.74, 30.77, 30.81, 33.03, 43.94, 47.83$  (2C), 120.57, 126.56, 127.23, 128.01, 128.57, 128.73, 130.75, 130.76, 130.86, 131.13, 139.15, 140.58; HRMS (ESI) :  $m/z$  [M + H] calculated for  $\text{C}_{30}\text{H}_{49}\text{N}_2\text{O}_2\text{S}$ : 501.35393; found: 501.35303.

D5

*N, N'*-didecyl-5-(dimethylamino) naphthalene-1-sulfonamide

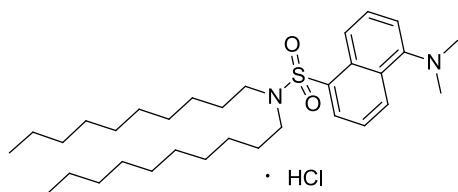

D5 (HCl-salt) (179mg, 93%) was obtained from didecylamine (100mg, 0.34mmol) and DNS-Cl (91mg, 0.34mmol) as white wax.  $^1\text{H}$  NMR (400MHz,  $\text{CD}_3\text{OD}$ ):  $\delta = 0.90$  (t,  $J = 6.7$  Hz, 6H), 1.19-1.27 (m, 28H), 1.50 (br, 4H), 3.28 (br, 2H), 3.35 (br, 2H), 3.45 (s, 6H), 7.83-7.92 (m, 2H),



8.05 (d,  $J = 7.7$  Hz, 1H), 8.33 (d,  $J = 7.2$  Hz, 1H), 8.55 (d,  $J = 8.8$  Hz, 1H), 8.81 (d,  $J = 8.8$  Hz, 1H);  $^{13}\text{C}$  NMR (101MHz,  $\text{CD}_3\text{OD}$ ):  $\delta = 14.43$  (2C), 23.72 (2C), 27.61 (2C), 29.33 (2C), 30.19 (2C), 30.41 (4C), 30.56 (2C), 30.59 (2C), 33.04 (2C), 47.63 (2C), 120.21, 126.93, 127.76 (2C), 128.19, 128.63, 129.54, 131.22 (2C), 138.62. HRMS (ESI) :  $m/z$  [M + H] calculated for  $\text{C}_{32}\text{H}_{55}\text{N}_2\text{O}_2\text{S}$ : 531.39788; found: 531.39752.

D6

*N*-(2-aminoethyl)-5-(dimethylamino) naphthalene-1-sulfonamide

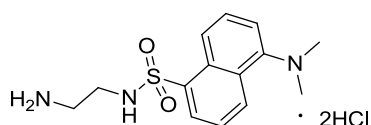

D6 (HCl-salt) (110 mg, 80%) was obtained from ethane-1,2-diamine (22mg, 0.37mmol) and DNS-Cl (100mg, 0.37mmol) as white power.  $^1\text{H}$  NMR (400MHz,  $\text{CD}_3\text{OD}$ ):  $\delta = 3.07$ -3.11 (m, 4H), 3.49 (s, 6H), 7.89-7.95 (m, 2H), 8.13 (d,  $J = 7.7$  Hz, 1H), 8.41 (d,  $J = 7.3$  Hz, 1H), 8.66 (d,  $J = 8.7$  Hz, 1H), 8.90 (d,  $J = 8.7$  Hz, 1H).  $^{13}\text{C}$  NMR (101MHz,  $\text{CD}_3\text{OD}$ ):  $\delta = 40.81$ , 41.23, 47.83(2C), 120.85, 127.36, 127.40, 127.97, 128.30, 129.02, 130.55, 131.51, 137.69, 140.83. HRMS (ESI) :  $m/z$  [M + H] calculated for  $\text{C}_{14}\text{H}_{20}\text{N}_3\text{O}_2\text{S}$ : 294.12707; found: 294.12665.

D7

5-(Dimethylamino)-*N*-(4-hydroxybutyl) naphthalene-1-sulfonamide

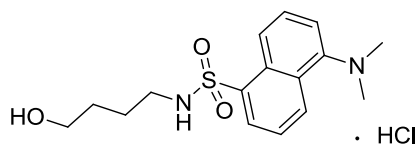

D7 (HCl-salt) (110 mg, 83%) was obtained from 4-Amino-1-butanol (33mg, 0.37mmol) and DNS-Cl (100mg, 0.37mmol) as white powder.  $^1\text{H}$  NMR (400MHz,  $\text{CD}_3\text{OD}$ ):  $\delta = 1.33$ -1.47 (m, 4H), 2.89 (t,  $J = 6.5$  Hz, 2H), 3.39 (t,  $J = 6.0$  Hz, 2H), 3.51 (s, 6H), 7.85-7.92 (m, 2H), 8.13 (d,  $J = 7.8$  Hz, 1H), 8.38 (d,  $J = 7.4$  Hz, 1H), 8.61 (d,  $J = 8.7$  Hz, 1H), 8.94 (d,  $J = 8.8$  Hz, 1H);  $^{13}\text{C}$  NMR (101MHz,  $\text{CD}_3\text{OD}$ ):  $\delta = 27.24$ , 30.47, 43.80, 47.83 (2C), 62.19, 120.60, 126.59, 127.21,

128.01, 128.60, 128.66, 130.69, 131.15, 139.00, 140.52; HRMS (ESI) : m/z [M + H] calculated for C<sub>16</sub>H<sub>23</sub>N<sub>2</sub>O<sub>3</sub>S: 323.14239; found: 323.14233.

D8

*N*-(6-aminohexyl)-5-(dimethylamino) naphthalene-1-sulfonamide

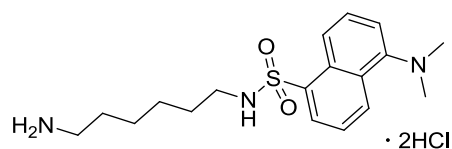

D8 (2HCl-salt) (142mg, 74%) was obtained from 1,6-hexanediamine (429mg, 3.7mmol) and DNS-Cl (100mg, 0.37mmol) as white powder. <sup>1</sup>H NMR (400MHz, CD<sub>3</sub>OD): δ = 1.25 (br, 4H), 1.41 (br, 2H), 1.54 (br, 2H), 2.82-2.89(m, 4H), 3.51 (s, 6H), 7.86-7.92 (m, 2H), 8.15 (d, *J* = 7.7 Hz, 1H), 8.36 (d, *J* = 7.3 Hz, 1H), 8.67 (d, *J* = 8.6 Hz, 1H), 8.94 (d, *J* = 8.7 Hz, 1H); <sup>13</sup>C NMR (101MHz, CD<sub>3</sub>OD): δ = 26.83, 26.96, 28.35, 30.52, 40.61, 43.72, 44.14, 47.88 (2C), 120.77, 126.75, 127.17, 128.04, 128.64, 128.79, 130.71, 131.09, 139.06, 140.36; HRMS (ESI) : m/z [M + H] calculated for C<sub>18</sub>H<sub>28</sub>N<sub>3</sub>O<sub>2</sub>S: 350.18967; found: 350.18900.

D9

*N*-(8-aminooctyl)-5-(dimethylamino) naphthalene-1-sulfonamide

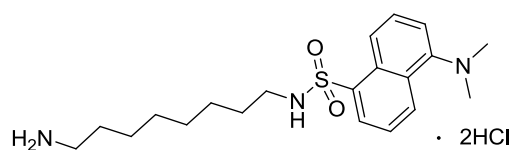

D9 (2HCl-salt) (113mg, 68%) was obtained from 1,8-diaminooctane (535mg, 3.7mmol) and DNS-Cl (100mg, 0.37mmol) as white powder. <sup>1</sup>H NMR (400MHz, CD<sub>3</sub>OD): δ = 1.21-1.40 (br, 10H), 1.60-1.63 (m, 2H), 2.86-2.91 (m, 4H), 3.48(s, 6H), 7.85-7.92 (m, 2H), 8.10 (d, *J* = 7.8 Hz, 1H), 8.36 (d, *J* = 7.1 Hz, 1H), 8.62 (d, *J* = 8.8 Hz, 1H), 8.92 (d, *J* = 8.8 Hz, 1H); <sup>13</sup>C NMR (101MHz, CD<sub>3</sub>OD): δ = 27.28, 27.32, 28.46, 29.76, 29.93, 30.60, 40.73, 43.84, 47.80 (2C), 120.60, 126.93, 127.31, 127.89, 128.48, 128.63, 130.71, 131.09, 139.00, 140.87; HRMS (ESI) : m/z [M + H] calculated for C<sub>20</sub>H<sub>32</sub>N<sub>3</sub>O<sub>2</sub>S: 378.22097; found: 378.22049.

D10

*N*-(2-(2-(2-aminoethoxy)ethoxy)ethyl)-5-(dimethylamino)naphthalene-1-sulfonamide

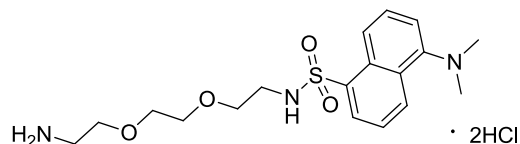

D10 (2HCl-salt) (110mg, 66%) was obtained from 1,8-diamino-3,6-dioxaoctane (551mg, 3.7mmol) and DNS-Cl (100mg, 0.37mmol) as white power.  $^1\text{H}$  NMR (400MHz,  $\text{CD}_3\text{OD}$ ):  $\delta$  = 3.05-3.08 (m, 4H), 3.40-3.43 (m, 4H), 3.48 (br, 8H), 3.64 (t,  $J$  = 4.8 Hz, 2H), 7.84-7.89 (m, 2H), 8.13 (d,  $J$  = 7.7 Hz, 1H), 8.36 (d,  $J$  = 7.3 Hz, 1H), 8.72 (d,  $J$  = 8.6 Hz, 1H), 8.89 (d,  $J$  = 8.7 Hz, 1H);  $^{13}\text{C}$  NMR (101MHz,  $\text{CD}_3\text{OD}$ ):  $\delta$  = 40.63, 43.68, 47.82 (2C), 49.85, 67.74, 70.69, 71.12, 120.70, 127.12, 127.28, 127.88, 128.44, 128.70, 130.63, 130.95, 138.90, 140.82; HRMS (ESI) :  $m/z$  [M + H] calculated for  $\text{C}_{18}\text{H}_{28}\text{N}_3\text{O}_4\text{S}$ : 382.17950; found: 382.17908.

D11

*N*-(10-aminodecyl)-5-(dimethylamino) naphthalene-1-sulfonamide

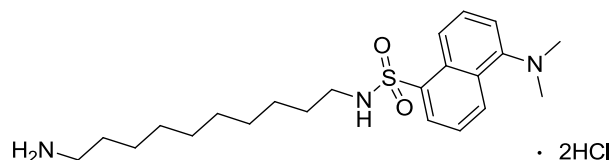

D11 (2HCl-salt) (99.5mg, 56%) was obtained from 1,10-Diaminodecane (640mg, 3.7mmol) and DNS-Cl (100mg, 0.37mmol) as white power.  $^1\text{H}$  NMR (400MHz,  $\text{CD}_3\text{OD}$ ):  $\delta$  = 1.16-1.37 (br, 14H), 1.60-1.67 (br, 2H), 2.84-2.92 (br, 4H), 3.49(s, 6H), 7.85-7.92 (m, 2H), 8.13 (d,  $J$  = 7.8 Hz, 1H), 8.37 (d,  $J$  = 7.3 Hz, 1H), 8.64 (d,  $J$  = 8.7 Hz, 1H), 8.94 (d,  $J$  = 8.8 Hz, 1H);  $^{13}\text{C}$  NMR (101MHz,  $\text{CD}_3\text{OD}$ ):  $\delta$  = 27.42, 27.47, 28.55, 30.02, 30.12, 30.31, 30.36, 30.70, 40.78, 43.91, 47.81(2C), 120.52, 126.78, 127.34, 127.91, 128.52, 128.60, 130.76, 131.08, 139.09, 140.90; HRMS (ESI) :  $m/z$  [M + H] calculated for  $\text{C}_{22}\text{H}_{36}\text{N}_3\text{O}_2\text{S}$ : 406.25227; found: 406.25177.

D12

*N*-(12-aminododecyl)-5-(dimethylamino) naphthalene-1-sulfonamide

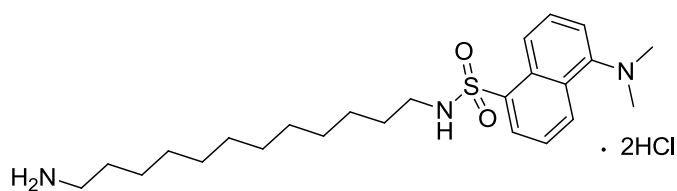

D12 (2HCl-salt) (200.3mg, 71%) was obtained from 1,12-diaminododecane (1.1g, 5.6mmol) and DNS-Cl (150mg, 0.56mmol) as white powder.  $^1\text{H}$  NMR (400MHz,  $\text{CD}_3\text{OD}$ ):  $\delta$  = 1.16-1.37 (br, 18H), 1.62-1.67 (m, 2H), 2.85-2.92 (m, 4H), 3.49(s, 6H), 7.85-7.92 (m, 2H), 8.11 (br, 1H), 8.38 (d,  $J$  = 7.3 Hz, 1H), 8.64 (br, 1H), 8.94 (d,  $J$  = 8.7 Hz, 1H).  $^{13}\text{C}$  NMR (101MHz,  $\text{CD}_3\text{OD}$ ):  $\delta$  = 27.44, 27.51, 28.56, 30.08, 30.19, 30.46, 30.49, 30.55(2C), 30.69, 40.77, 43.92, 47.80(2C), 120.55, 126.79, 127.31, 127.91, 128.53, 128.60, 130.73, 131.11, 139.05, 140.86. HRMS (ESI) :  $m/z$  [M + H] calculated for  $\text{C}_{24}\text{H}_{40}\text{N}_3\text{O}_2\text{S}$ : 434.28357; found: 434.28326.

### D13

*N, N'*-(ethane-1, 2-diyl) bis(5-(dimethylamino)naphthalene-1-sulfonamide)

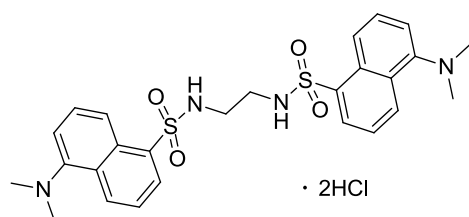

D13 (2HCl-salt) (99mg, 92%) was obtained from 1,2-Diaminoethane (11mg, 0.18mmol) and DNS-Cl (100mg, 0.37mmol) as white powder.  $^1\text{H}$  NMR (400MHz,  $\text{CD}_3\text{OD}$ ):  $\delta$  = 2.87 (s, 4H), 3.50 (s, 12H), 7.88 (dd,  $J_1$  = 17.6 Hz,  $J_2$  = 8.8 Hz, 4H), 8.12 (d,  $J$  = 7.7 Hz, 2H), 8.30 (d,  $J$  = 7.3 Hz, 2H), 8.58 (d,  $J$  = 8.8 Hz, 2H), 8.84 (d,  $J$  = 8.8 Hz, 2H).  $^{13}\text{C}$  NMR (101MHz,  $\text{CD}_3\text{OD}$ ):  $\delta$  = 43.75 (2C), 47.77 (4C), 120.48 (2C), 126.70 (2C), 127.42 (2C), 127.91 (2C), 128.38 (2C), 128.74 (2C), 130.65 (2C), 131.18 (2C), 138.56 (2C), 140.89 (2C). HRMS:  $m/z$  [M + H] calculated for  $\text{C}_{26}\text{H}_{31}\text{N}_4\text{O}_4\text{S}_2$ : 527.17812; found: 527.17810.

### D14

*N, N'*-(butane-1, 4-diyl)bis(5-(dimethylamino)naphthalene-1-sulfonamide)

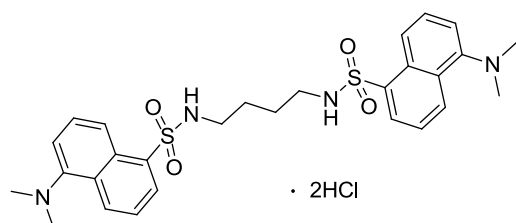

D14 (2HCl-salt) (146mg, 88%) was obtained from 1,4-diaminobutane (23mg, 0.26mmol) and DNS-Cl (150mg, 0.56mmol) as white power.  $^1\text{H}$  NMR (400MHz,  $\text{CD}_3\text{OD}$ ):  $\delta$  = 1.23 (br, 4H), 2.68 (br, 4H), 3.50(s, 12H), 7.87-7.89 (m, 4H), 8.12 (d,  $J$  = 7.1 Hz, 2H), 8.32 (d,  $J$  = 7.1 Hz, 2H), 8.58 (d,  $J$  = 8.5 Hz, 2H), 8.89 (d,  $J$  = 7.9 Hz, 2H).  $^{13}\text{C}$  NMR (101MHz,  $\text{CD}_3\text{OD}$ ):  $\delta$  = 27.52(2C), 43.12(2C), 47.73(4C), 120.36(2C), 126.67(2C), 127.45(2C), 127.89(2C), 128.24(2C), 128.67(2C), 130.68(2C), 131.11(2C), 138.92(2C), 141.21(2C). HRMS (ESI) :  $m/z$  [M + H] calculated for  $\text{C}_{28}\text{H}_{35}\text{N}_4\text{O}_4\text{S}_2$ : 555.20942; found: 555.20935.

#### D15

5-(Dimethylamino)-*N*-(2-(2-(8-(dimethylamino)naphthalene-2-sulfonamido)ethoxy)ethyl)naphthalene-1-sulfonamide

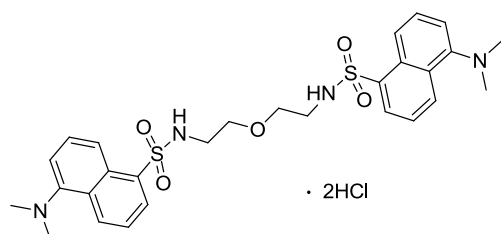

D15 (2HCl-salt) (91.7mg, 53%) was obtained from 2, 2'-oxybis(ethylamine) (28mg, 0.26mmol) and DNS-Cl (150mg, 0.56mmol) as white power.  $^1\text{H}$  NMR (400MHz,  $\text{CD}_3\text{OD}$ ):  $\delta$  = 2.83(t,  $J$  = 5.3 Hz, 4H), 3.04 (t,  $J$  = 5.3 Hz, 4H), 3.49 (s, 12H), 7.85-7.90 (m, 4H), 8.11 (d,  $J$  = 7.8 Hz, 2H), 8.34 (d,  $J$  = 7.3 Hz, 2H), 8.61 (d,  $J$  = 8.7 Hz, 2H), 8.88 (d,  $J$  = 8.8 Hz, 2H).  $^{13}\text{C}$  NMR (101MHz,  $\text{CD}_3\text{OD}$ ): 43.61(2C), 47.67(4C), 70.26(2C), 120.31(2C), 126.98(2C), 127.53(2C), 127.75(2C), 128.00(2C), 128.74(2C), 130.70(2C), 130.93(2C), 139.03(2C), 141.58(2C); HRMS (ESI) :  $m/z$  [M + H] calculated for  $\text{C}_{28}\text{H}_{35}\text{N}_4\text{O}_5\text{S}_2$ : 571.20434; found: 571.20422.

#### D16

*N, N'*-(hexane-1, 6-diyl)bis(5-(dimethylamino)naphthalene-1-sulfonamide)

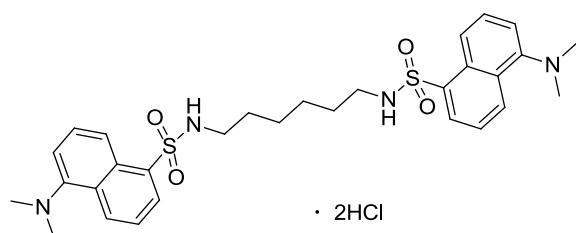

D16 (2HCl-salt) (118mg, 95%) was obtained from 1,6-Hexanediamine (21mg, 0.18mmol) and DNS-Cl (100mg, 0.37mmol) as white power.  $^1\text{H}$  NMR (400MHz,  $\text{CD}_3\text{OD}$ ):  $\delta$  = 0.95 (br, 4H), 1.17 (br, 4H), 2.77 (t,  $J$  = 6.9 Hz, 4H), 3.50 (s, 12H), 7.85-7.93 (m, 4H), 8.12 (d,  $J$  = 7.8 Hz, 2H), 8.36 (d,  $J$  = 7.3 Hz, 2H), 8.59 (d,  $J$  = 8.7 Hz, 2H), 8.92 (d,  $J$  = 8.8 Hz, 2H);  $^{13}\text{C}$  NMR (101MHz,  $\text{CD}_3\text{OD}$ ):  $\delta$  = 26.80 (2C), 30.44 (2C), 43.68 (2C), 47.78 (4C), 120.46 (2C), 126.66 (2C), 127.36 (2C), 127.95 (2C), 128.45 (2C), 128.63 (2C), 130.74 (2C), 131.12 (2C), 139.07 (2C), 140.97 (2C); HRMS (ESI) :  $m/z$  [M + H] calculated for  $\text{C}_{30}\text{H}_{39}\text{N}_4\text{O}_4\text{S}_2$ : 583.24072; found: 583.24054.

D17

*N, N'*-((ethane-1,2-diylbis(oxy))bis(ethane-2,1-diyl))bis(5-(dimethylamino)naphthalene-1-sulfonamide)

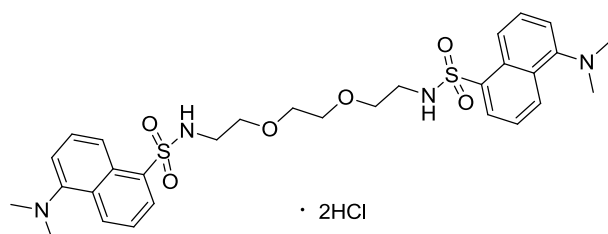

D17 (2HCl-salt) (106mg, 62%) was obtained from 1,8-diamino-3,6-dioxaoctane (38mg, 0.25mmol) and DNS-Cl (150mg, 0.50mmol) as yellow power.  $^1\text{H}$  NMR (400MHz,  $\text{CD}_3\text{OD}$ ):  $\delta$  = 3.05 (t,  $J$  = 5.4 Hz, 4H), 3.24 (s, 4H), 3.35 (t,  $J$  = 5.4 Hz, 4H), 3.48 (s, 12H), 7.88 (dd,  $J_1$  = 17.5 Hz,  $J_2$  = 8.8 Hz, 4H), 8.10 (d,  $J$  = 7.7 Hz, 2H), 8.39 (d,  $J$  = 7.3 Hz, 2H), 8.58 (d,  $J$  = 8.7 Hz, 2H), 8.91 (d,  $J$  = 8.7 Hz, 2H);  $^{13}\text{C}$  NMR (101MHz,  $\text{CD}_3\text{OD}$ ):  $\delta$  = 43.77 (2C), 47.85 (4C), 70.65 (2C), 71.00 (2C), 120.63 (2C), 126.75 (2C), 127.26 (2C), 128.04 (2C), 128.67 (4C), 130.71 (2C), 131.04 (2C), 139.09 (2C), 140.63 (2C); HRMS (ESI) :  $m/z$  [M + H] calculated for  $\text{C}_{30}\text{H}_{39}\text{N}_4\text{O}_6\text{S}_2$ : 615.23055; found: 615.22974.

D18

*N, N'*-(octane-1, 8-diyl)bis(5-(dimethylamino)naphthalene-1-sulfonamide)

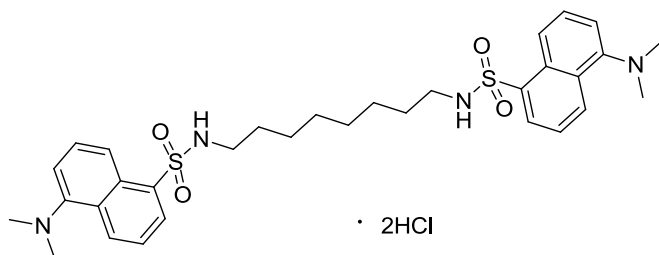

D18 (2HCl-salt) (109mg, 89%) was obtained from 1,8-Diaminooctane (26mg, 0.18mmol) and DNS-Cl (100mg, 0.37mmol) as white power.  $^1\text{H}$  NMR (400MHz,  $(\text{CD}_3)_2\text{SO}$ ):  $\delta$  = 0.79 (br, 4H), 0.92 (br, 4H), 1.17-1.20 (m, 4H), 2.72-2.74 (m, 4H), 3.01 (s, 12H), 7.59 (br, 2HNH), 7.69 (dd,  $J_1$  = 15.8 Hz,  $J_2$  = 8.0 Hz, 4H), 7.95 (br, 2H), 8.14 (d,  $J$  = 7.2 Hz, 2H), 8.50 (d,  $J$  = 7.9 Hz, 2H), 8.68 (d,  $J$  = 8.0 Hz, 2H);  $^{13}\text{C}$  NMR (101MHz,  $(\text{CD}_3)_2\text{SO}$ ):  $\delta$  = 25.58 (2C), 28.05 (2C), 28.82 (2C), 42.21 (2C), 45.53 (4C), 124.51 (2C), 127.51 (4C), 128.43 (4C), 128.49 (4C), 128.84 (4C), 136.47 (2C); HRMS (ESI) :  $m/z$   $[\text{M} + \text{H}]$  calculated for  $\text{C}_{32}\text{H}_{43}\text{N}_4\text{O}_4\text{S}_2$ : 611.27202; found: 611.27045.

D19

*N, N'*-(decane-1,10-diyl)bis(5-(dimethylamino)naphthalene-1-sulfonamide)

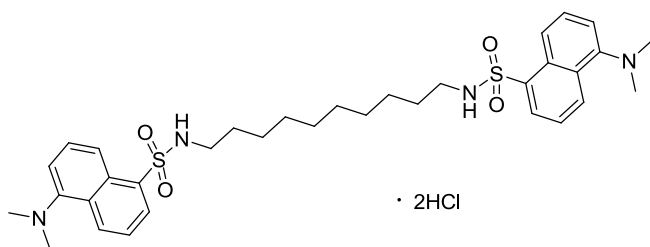

D19 (2HCl-salt) (163.5mg, 86%) was obtained from 1, 10-diaminodecane (46mg, 0.26mmol) and DNS-Cl (150mg, 0.56mmol) as white power.  $^1\text{H}$  NMR (400MHz,  $\text{CD}_3\text{OD}$ ):  $\delta$  = 1.05-1.23 (br, 12H), 1.30-1.36 (br, 4H), 2.86 (t,  $J$  = 6.9 Hz, 4H), 3.49(s, 12H), 7.85-7.92 (m, 4H), 8.12 (d,  $J$  = 7.8 Hz, 2H), 8.37 (d,  $J$  = 7.3 Hz, 2H), 8.58 (d,  $J$  = 8.7 Hz, 2H), 8.94 (d,  $J$  = 8.8 Hz, 2H);  $^{13}\text{C}$  NMR (101MHz,  $\text{CD}_3\text{OD}$ ):  $\delta$  = 27.43(2C), 29.95(2C), 30.27(2C), 30.63(2C), 43.89(2C), 47.82(4C), 120.53(2C), 126.60(2C), 127.28(2C), 127.99(2C), 128.60(4C), 130.74(2C),

131.14(2C), 139.11(2C), 140.74(2C); HRMS (ESI) : m/z [M + H] calculated for C<sub>34</sub>H<sub>47</sub>N<sub>4</sub>O<sub>2</sub>S<sub>2</sub>: 639.30332; found: 639.30310.

D20

*N, N'*-(dodecane-1, 12-diyl)bis(5-(dimethylamino)naphthalene-1-sulfonamide)

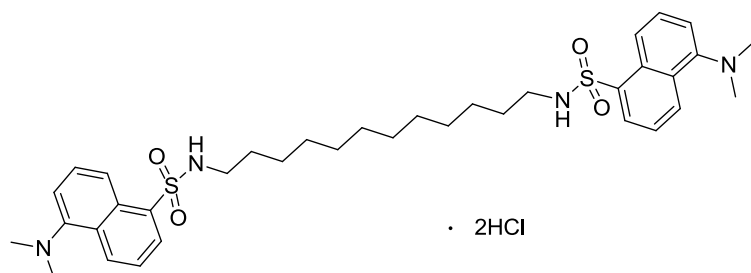

D20 (2HCl-salt) (180.5mg, 92%) was obtained from 1,12-diaminododecane (53mg, 0.26mmol) and DNS-Cl (150mg, 0.56mmol) as white power. <sup>1</sup>H NMR (400MHz, CD<sub>3</sub>OD): δ = 1.11 (br, 16H), 1.33-1.36 (m, 4H), 2.86 (t, *J* = 6.9 Hz, 4H), 3.49(s, 12H), 7.85-7.92 (m, 4H), 8.12 (d, *J* = 7.8 Hz, 2H), 8.37 (d, *J* = 7.3 Hz, 2H), 8.59 (d, *J* = 8.7 Hz, 2H), 8.94 (d, *J* = 8.7 Hz, 2H); <sup>13</sup>C NMR (101MHz, (CD<sub>3</sub>)<sub>2</sub>SO): δ = 25.63(2C), 28.18(2C), 28.57(2C), 28.59(2C), 28.81(2C), 42.13(2C), 45.70(4C), 118.00(2C), 123.56(2C), 124.97(2C), 126.87(2C), 127.32(4C), 127.92(2C), 128.55(2C), 128.61(2C), 136.51(2C); HRMS (ESI) : m/z [M + H] calculated for C<sub>36</sub>H<sub>51</sub>N<sub>4</sub>O<sub>4</sub>S<sub>2</sub>: 667.33462; found: 667.33411.

### 1.3. Probe characterization (photophysical parameters, cell cytotoxicity, cell distribution, incubation concentration)

General information: The fluorescence microscopy was performed with fluorescence microscopy Olympus IX71. Cancer cell lines, HepG2, MCF-7 and A2780 were obtained from cell center of Chinese Academy of Medical Sciences & Peking Union Medical College. They were cultured in DMEM medium (Invitrogen) with 10% fetal bovine serum (Gibco) at 37 °C with 5% CO<sub>2</sub>.

#### Screening of photophysical parameters (λ<sub>ex</sub>, λ<sub>em</sub>) for all CLFP probes.



Fluorescence excitation and emission spectra were measured and calculated with HITACHI F-7000 Fluorescence Spectrophotometer. Each compound was dissolved in PBS buffer, pH 7.4 with the concentration of 10  $\mu$ M.

Table S3, The photophysical parameters ( $\lambda_{ex}$ ,  $\lambda_{em}$ ) for all of the CLFP probe in this study.

| Cmpd | $\lambda_{ex}$ (nm) | $\lambda_{em}$ (nm) |
|------|---------------------|---------------------|
| B1   | 482                 | 504                 |
| B2   | 502                 | 508                 |
| B3   | 502                 | 510                 |
| B4   | 514                 | 522                 |
| B5   | 500                 | 508                 |
| B6   | 492                 | 504                 |
| B7   | 496                 | 506                 |
| B8   | 498                 | 510                 |
| B9   | 490                 | 504                 |
| B10  | 498                 | 510                 |
| B11  | 500                 | 510                 |
| B12  | 500                 | 510                 |
| B13  | 500                 | 510                 |
| D1   | 330                 | 558                 |
| D2   | 336                 | 544                 |
| D3   | 370                 | 498                 |
| D4   | 350                 | 498                 |
| D5   | 350                 | 494                 |
| D6   | 330                 | 564                 |
| D7   | 332                 | 556                 |
| D8   | 332                 | 554                 |
| D9   | 334                 | 550                 |
| D10  | 330                 | 560                 |
| D11  | 332                 | 546                 |
| D12  | 348                 | 530                 |
| D13  | 352                 | 502                 |
| D14  | 352                 | 504                 |
| D15  | 356                 | 506                 |
| D16  | 352                 | 500                 |
| D17  | 330                 | 508                 |
| D18  | 350                 | 502                 |
| D19  | 350                 | 500                 |
| D20  | 352                 | 502                 |

## Cell Cytotoxicity Assay

Probe B10 (0.5  $\mu\text{M}$ ) and D13 (25  $\mu\text{M}$ ) were incubated with three cell line HepG2, A2780 and MCF-7 for 1 hour, which is similar to the staining condition in this study. After that, the dyes were washed away using PBS buffer and cells were kept culturing under regular condition, and we did not observe cell toxicity for all three cell lines.

Nevertheless, we also evaluated cell cytotoxicities for all 33 fluorescent probes using MTT method. Most of the compounds have the  $\text{IC}_{50}$  over than 50  $\mu\text{M}$  for all tested cancer cell lines, but a few of them do show some cell cytotoxicities.

Table S4: Evaluation of cell cyto-toxicity of CLFP compounds

| Cmpd | $\text{IC}_{50}$ ( $\mu\text{M}$ ) |       |       |
|------|------------------------------------|-------|-------|
|      | HepG2                              | A2780 | MCF-7 |
| B1   | >50                                | >50   | >50   |
| B2   | >50                                | >50   | >50   |
| B3   | >50                                | >50   | >50   |
| B4   | >50                                | >50   | >50   |
| B5   | >50                                | >50   | >50   |
| B6   | >50                                | >50   | >50   |
| B7   | >50                                | >50   | >50   |
| B8   | >50                                | >50   | >50   |
| B9   | >50                                | >50   | >50   |
| B10  | 37                                 | 32    | 34    |
| B11  | 24                                 | 15    | 13    |
| B12  | 43                                 | 35    | 26    |
| B13  | >50                                | 46    | 41    |
| D1   | >50                                | >50   | >50   |
| D2   | >50                                | >50   | >50   |
| D3   | >50                                | 46    | >50   |
| D4   | >50                                | >50   | >50   |
| D5   | >50                                | >50   | >50   |
| D6   | >50                                | >50   | >50   |
| D7   | >50                                | >50   | >50   |
| D8   | >50                                | >50   | >50   |
| D9   | >50                                | >50   | >50   |
| D10  | >50                                | >50   | >50   |
| D11  | 26                                 | 29    | 26    |
| D12  | 27                                 | 29    | 31    |

|     |     |     |     |
|-----|-----|-----|-----|
| D13 | >50 | 48  | >50 |
| D14 | >50 | >50 | >50 |
| D15 | >50 | >50 | >50 |
| D16 | >50 | >50 | >50 |
| D17 | >50 | >50 | >50 |
| D18 | >50 | >50 | >50 |
| D19 | >50 | >50 | >50 |
| D20 | >50 | >50 | >50 |

### Screening of fluorescence intensities of the probes in living cells

HepG2 cells were seeded in cell culture plates, and when the cells reached 50% confluence, two series of fluorescent probes (BODIPY and DNS) were separately added into the each well with the final concentration of 0.5 $\mu$ M, 1 $\mu$ M (BODIPY), 10 $\mu$ M, 25 $\mu$ M (DNS). After incubation for 10 to 30 min, the fluorescent probes were washed away with PBS buffer. HepG2 cells were imaged under fluorescent microscopy. The relative fluorescence intensities of all probes were compared to choose the feasible CLFP probes (Figure S1-S4).

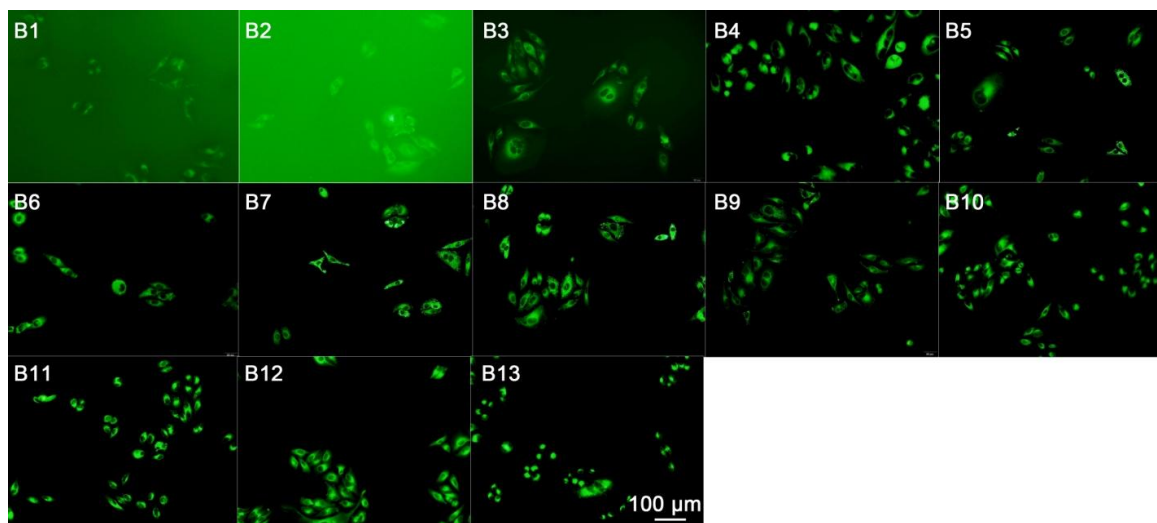

Figure S1. Screening of cellular distribution of fluorescent probes B1 to B13 in HepG2 cells at 0.5  $\mu$ M after 30min of incubation.

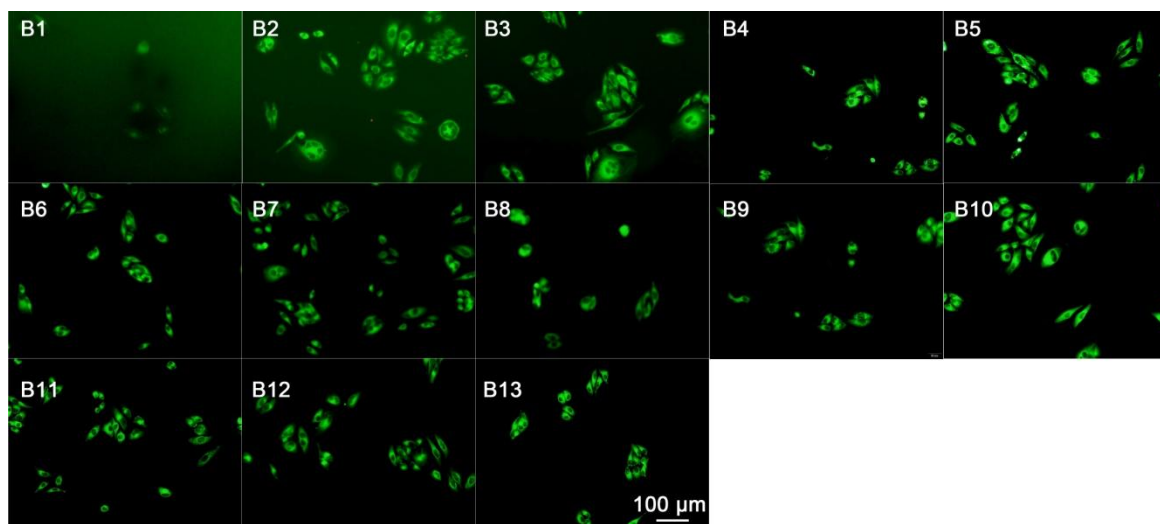

Figure S2. Screening of cellular distribution of fluorescent probes B1 to B13 in HepG2 cells at 1  $\mu\text{M}$  after 30 min of incubation.

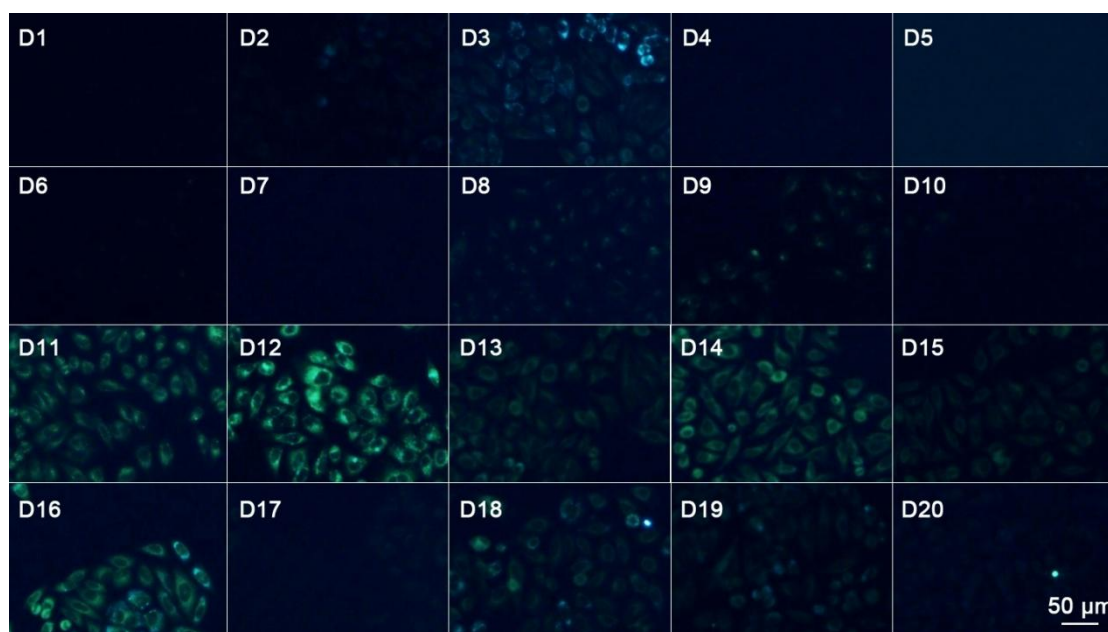

Figure S3. Screening of cellular distribution of fluorescent probes D1 to D20 in HepG2 cells at 10  $\mu\text{M}$  after 30 min of incubation.

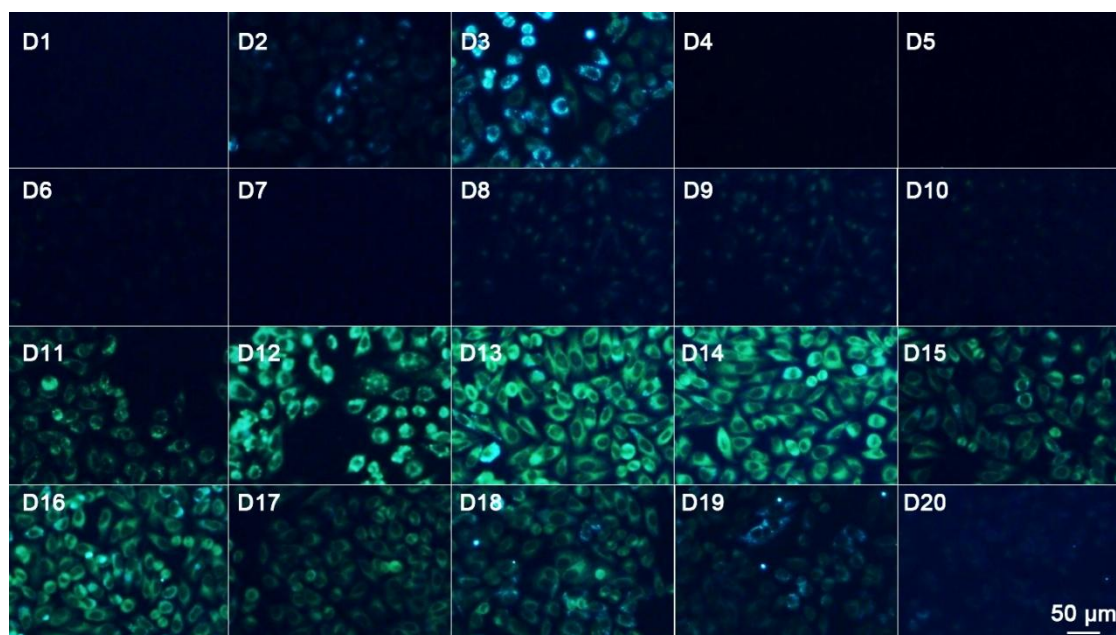

Figure S4. Screening of cellular distribution of fluorescent probes D1 to D20 in HepG2 cells at 25  $\mu$ M after 30min of incubation.

For BODIPY derivatives, at a concentration of 0.5 and 1  $\mu$ M, the fluorescent intensities of many probes in HepG2 cells were sufficiently bright (Figure S1, S2) after 10 to 30 min incubation. For DNS derivatives, at a concentration of 10  $\mu$ M, the fluorescent intensities of many probes in HepG2 cells were sufficiently bright (Figure S3, S4) after 10 to 30 min incubation. Generally, at the same molar concentration, probes with two DNS moieties exhibited stronger fluorescent intensity than probes with a single DNS moiety.

We finally chose probe B10 (0.5  $\mu$ M) and D13 (25  $\mu$ M) as the CLFP for this study, considering the sub-cellular distribution and fluorescence intensity.

### **Sub-cellular localization of fluorescent probes in various cell lines**

According to fluorescence intensities and the physical chemistry properties, probe B10 and D13 was selected to further detect the sub-cellular localization in various cancer cell lines. Cells were cultured in 24-well plates with low density. Notably, in the imaging experiment, probes D13 was only needed to incubate with cells for 0.5 hour, but in this sub-cellular localization experiment, we decided to incubate the probe with cells for at least 3 hours to evaluate the localization of these probes. So this make sure that probe D13 will not stain cell nuclei after long period of

incubation, which is important to maintain the reliability of CLFP assay of this study. After incubation, the medium was washed away with PBS buffer, HepG2 cells were imaged under confocal microscopy.

Copy of NMR spectra of all compounds

B1

3-carbonitrile-4,4-difluoro-1,3,5,7-tetramethyl-4-bora-3a,4a-diaza-s-indacene

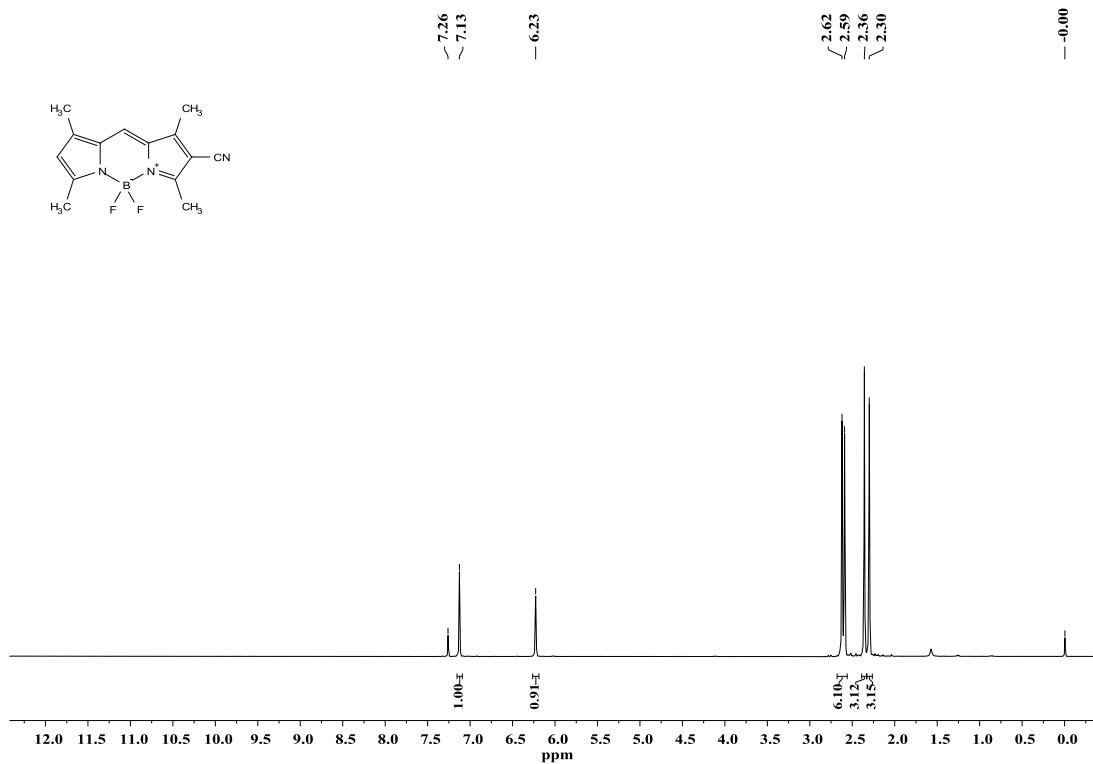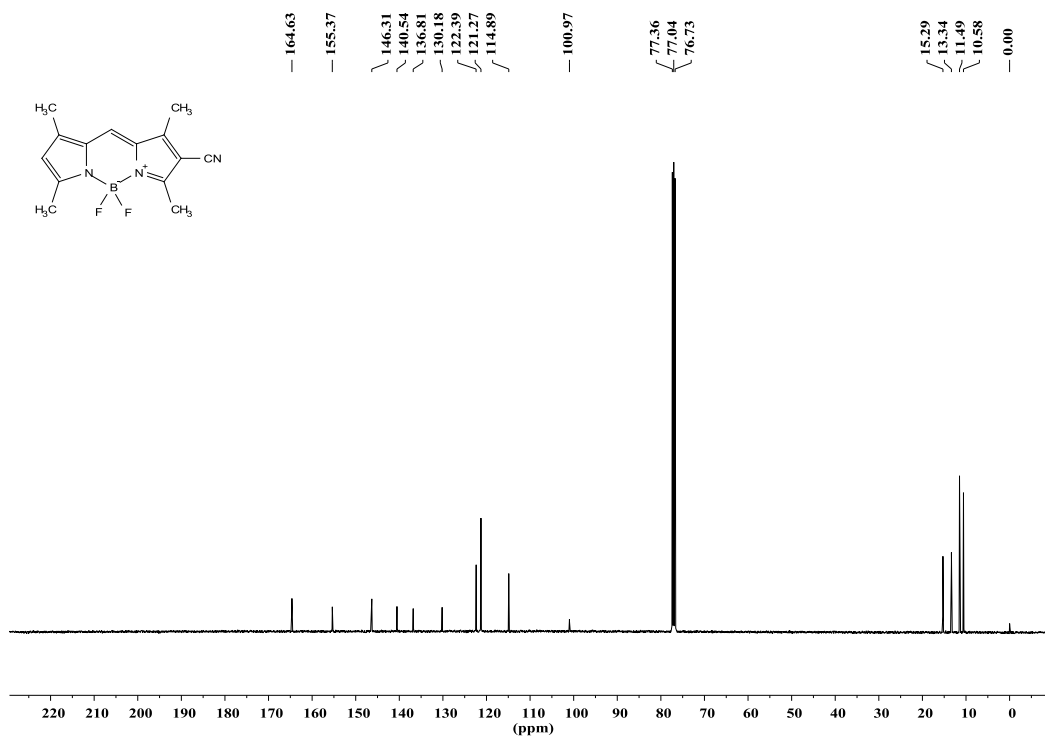

B2

4,4-difluoro-1,3,5,7-tetramethyl-4-bora-3a,4a-diaza-s-indacene

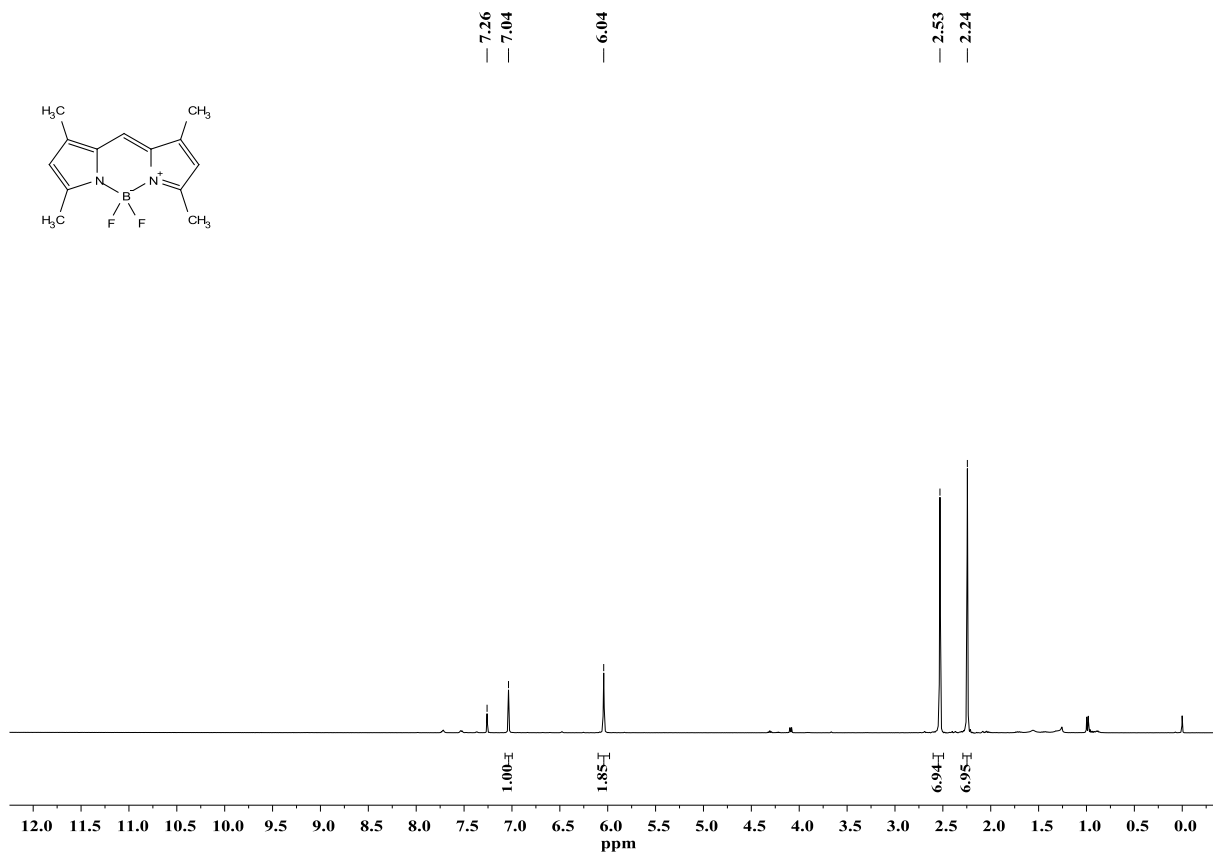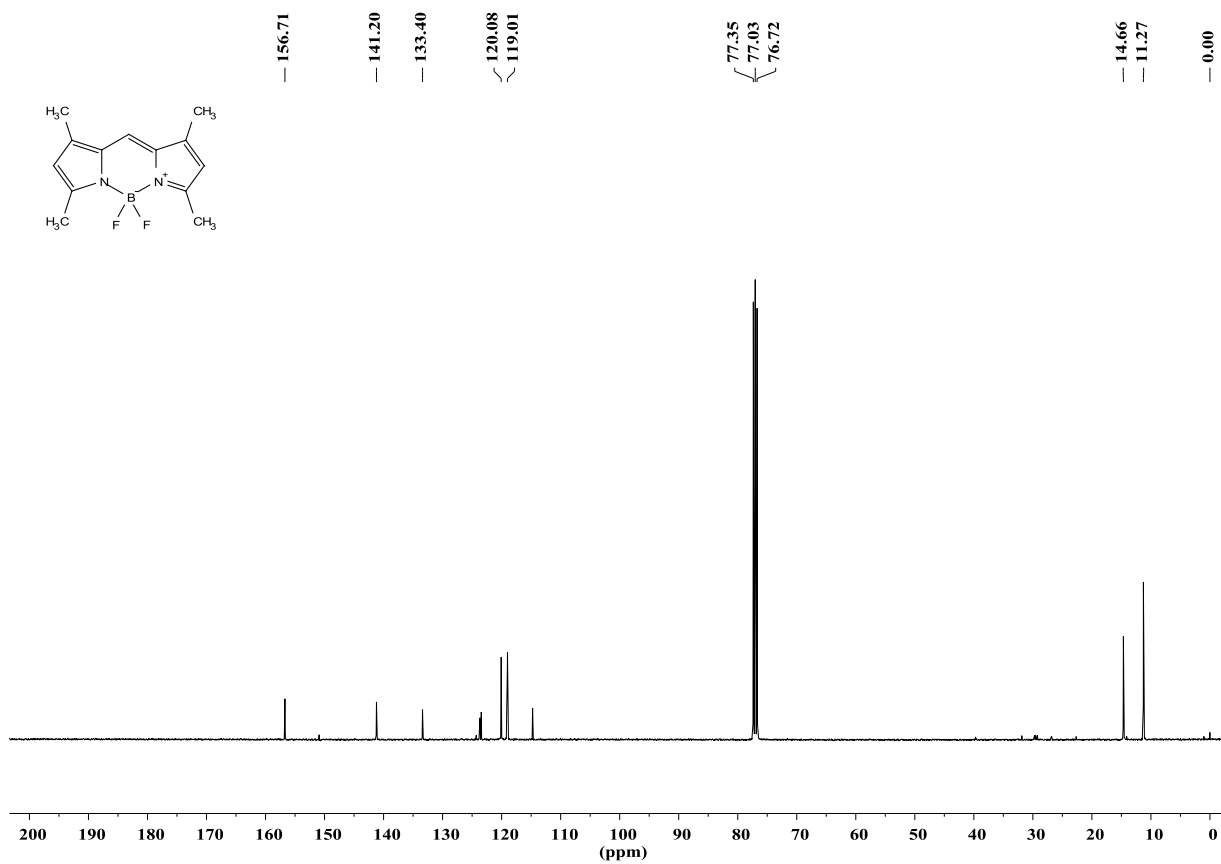



B3

2,2,2-trichloroethyl-2-(4,4-difluoro-5,7-dimethyl-4-bora-3a,4a-diaza-s-indacene-3-yl)acetate

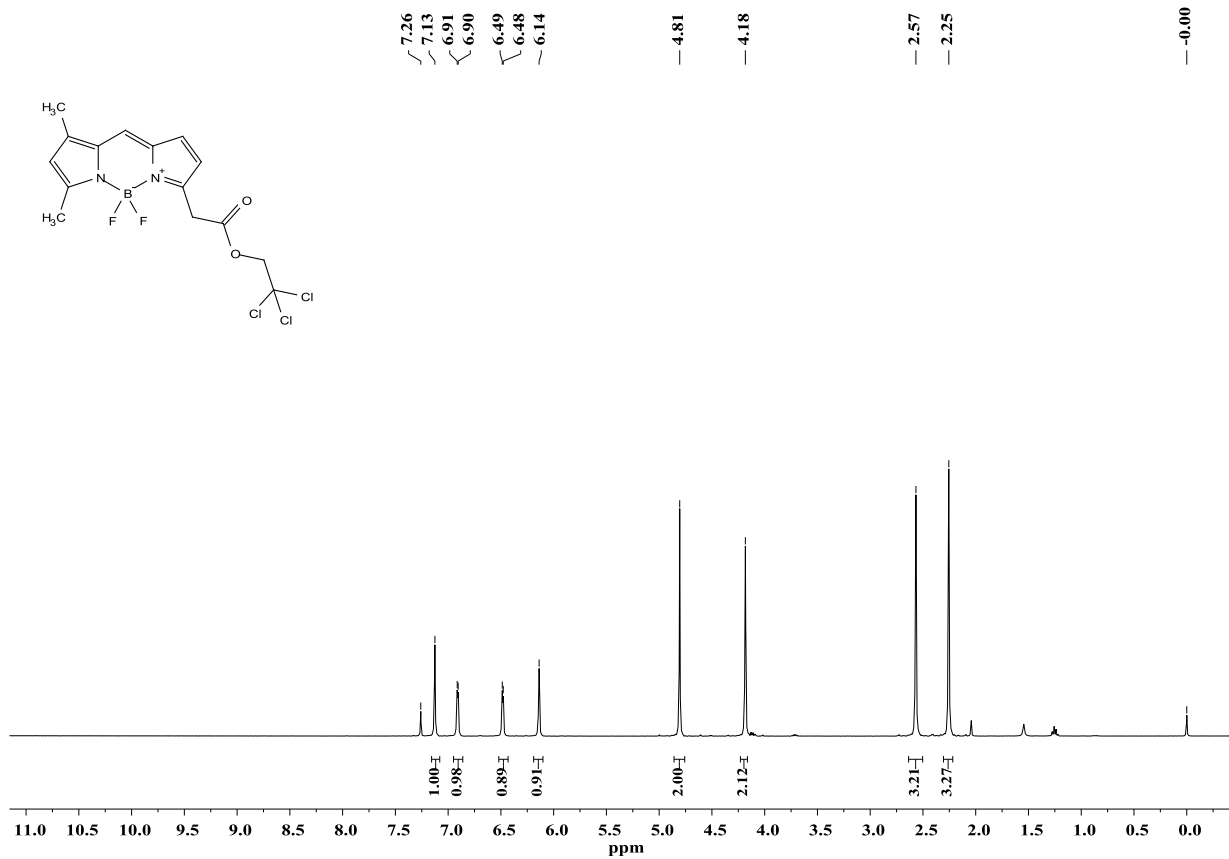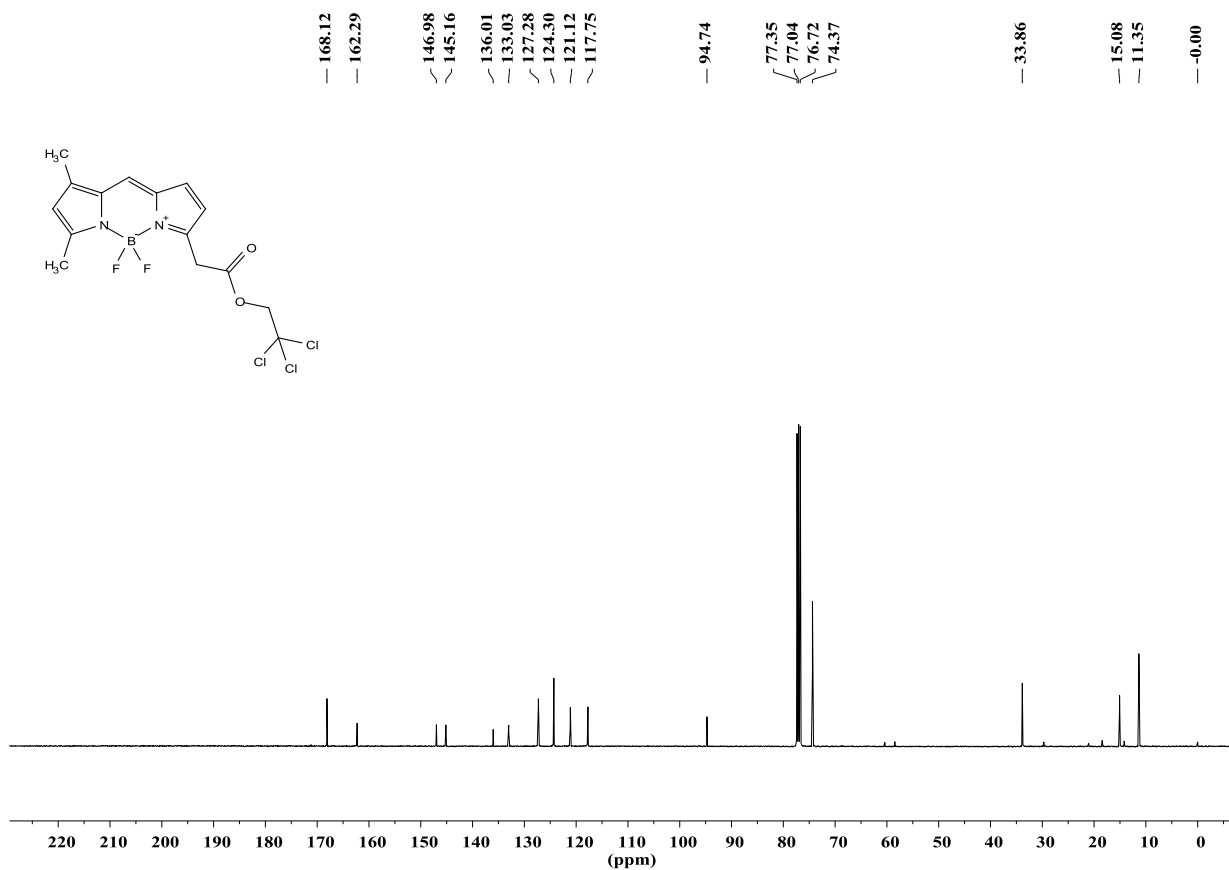

B4

2-ethyl-4,4-difluoro-1,3,5,7-tetramethyl-4-bora-3a,4a-diaza-s-indacene

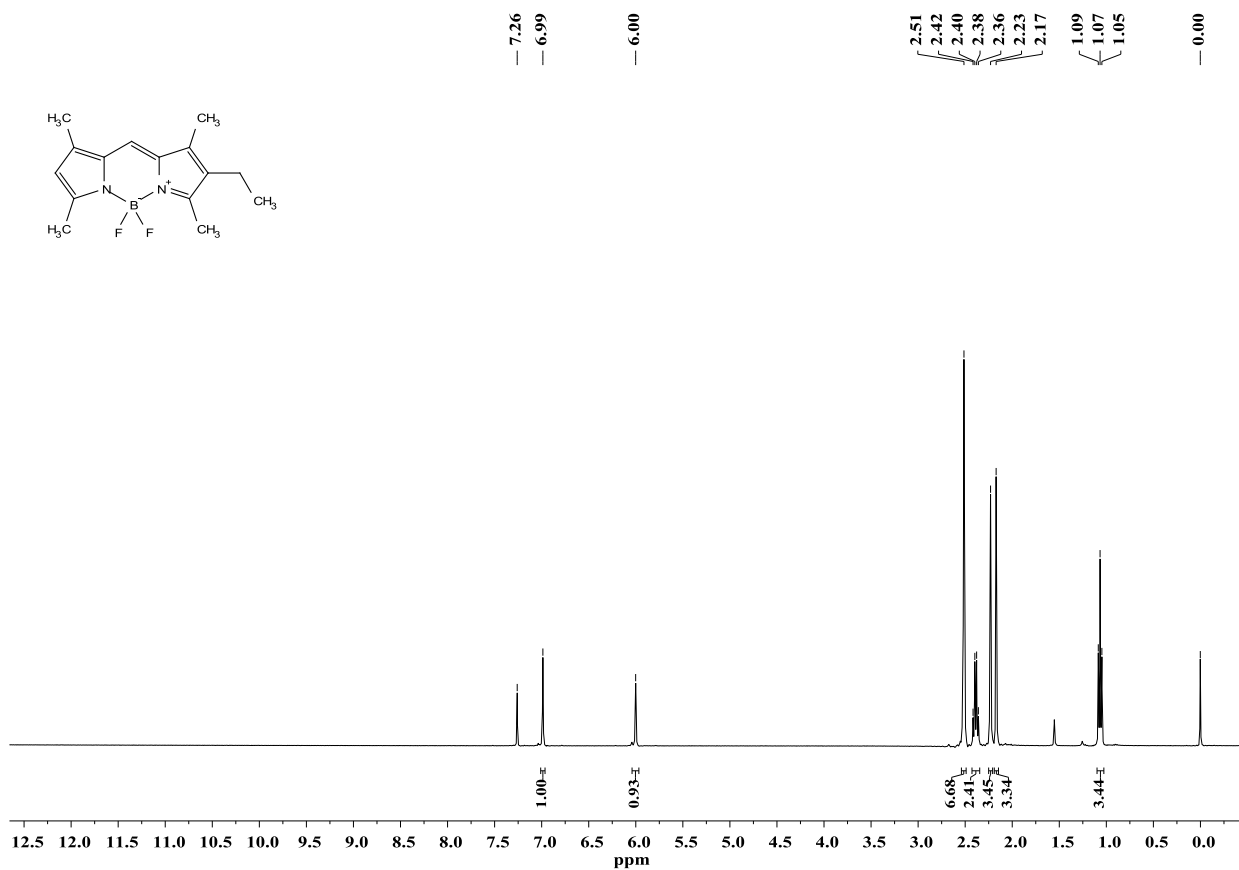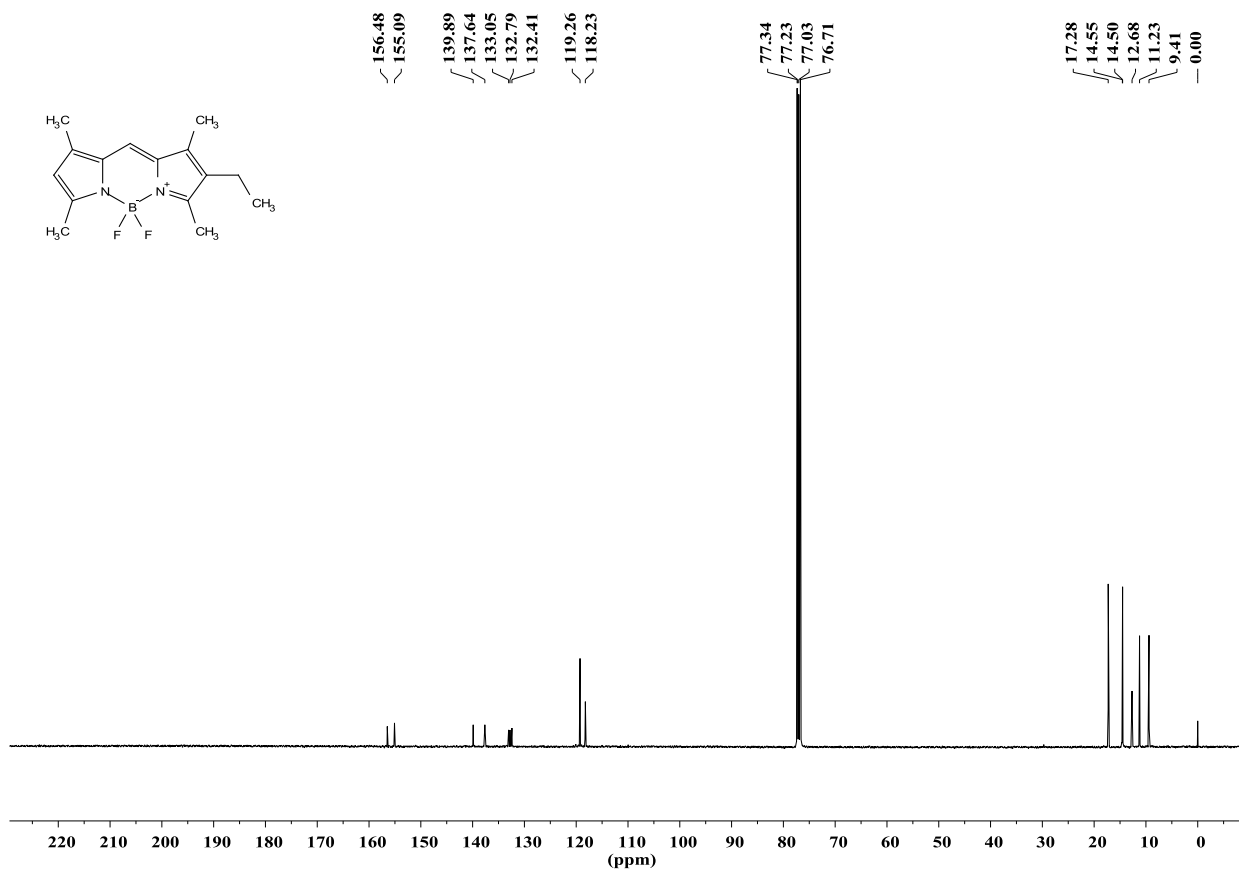

B5

8-(dec-9-yn-1-yl)-4,4-difluoro-1,3,5,7-tetramethyl-4-bora-3a,4a-diaza-s-indacene

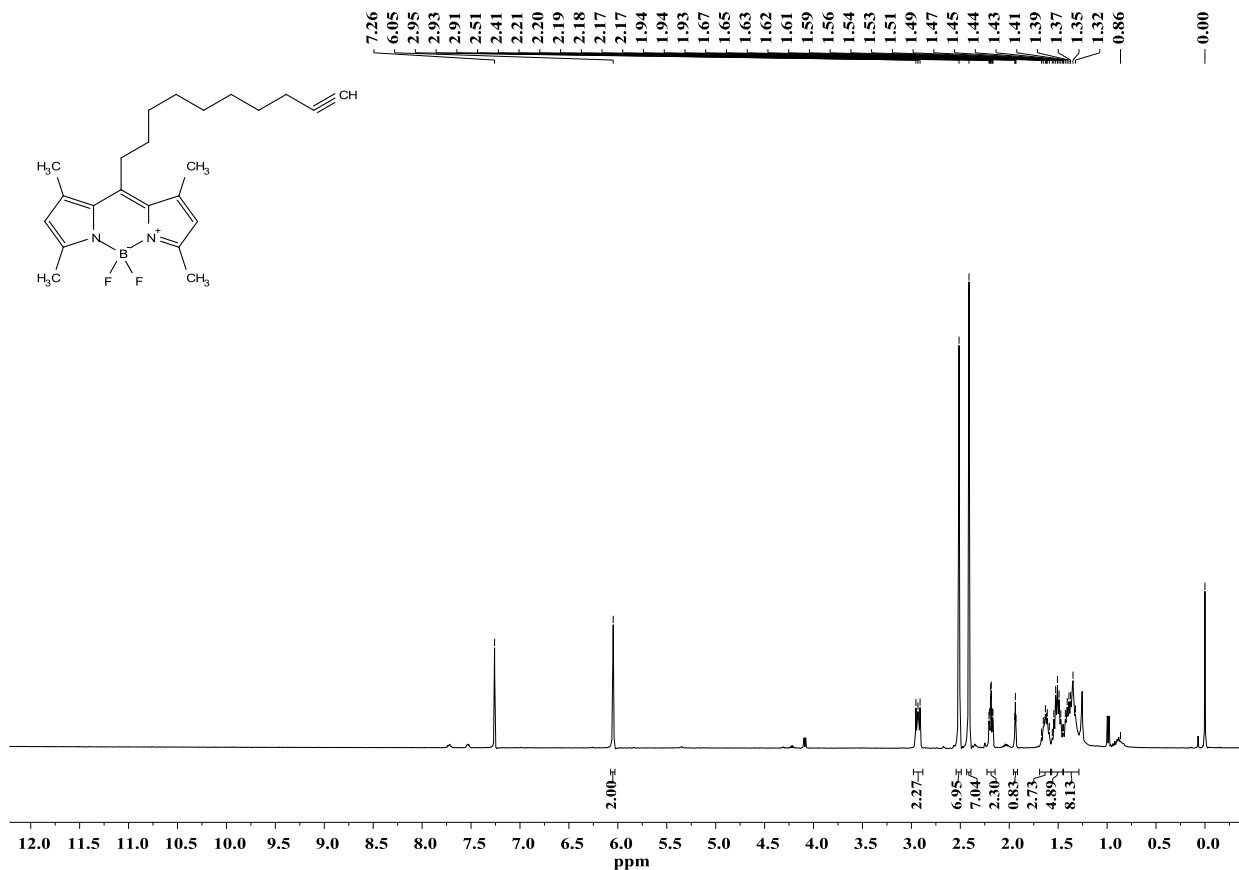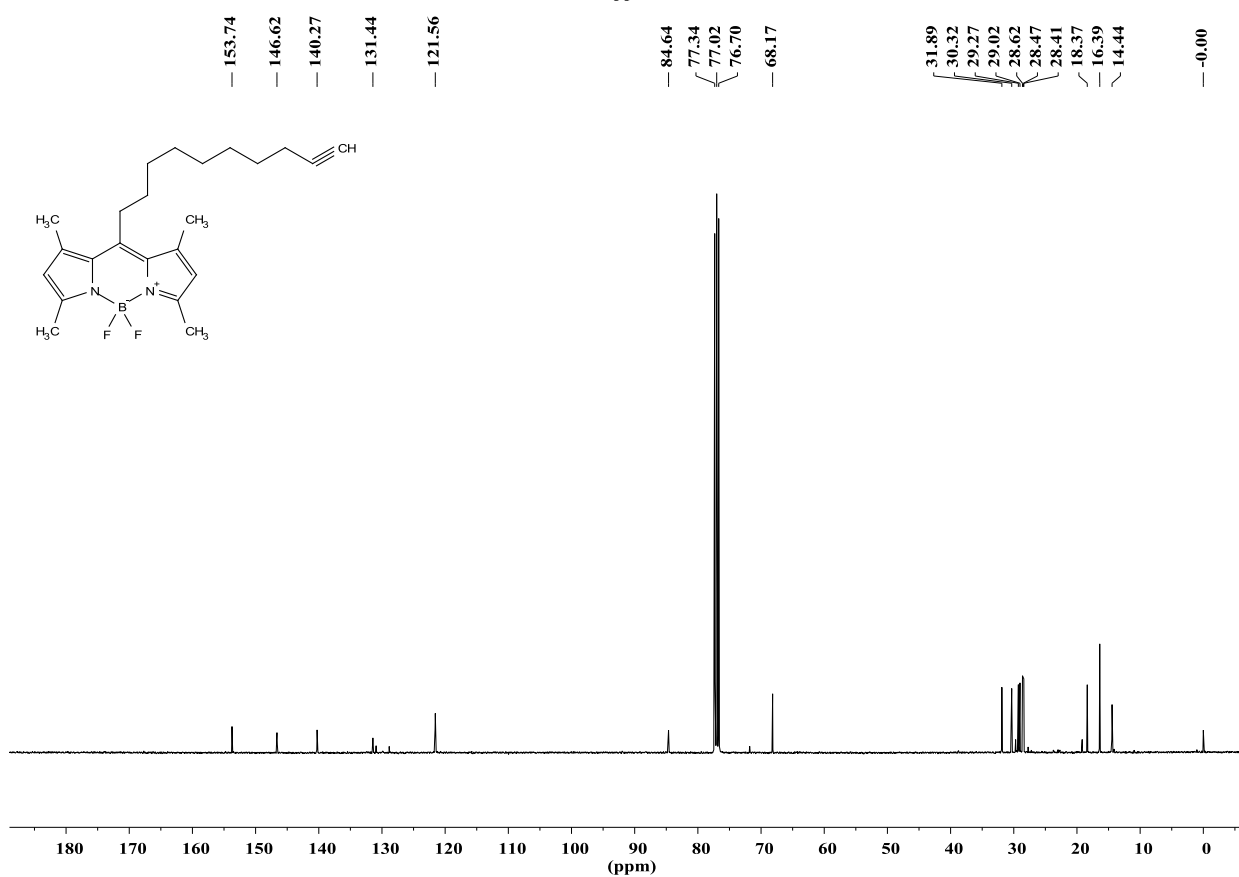

B6

4,4-difluoro-8-(hex-5-yn-1-yl)-1,3,5,7-tetramethyl-4-bora-3a,4a-diaza-s-indacene

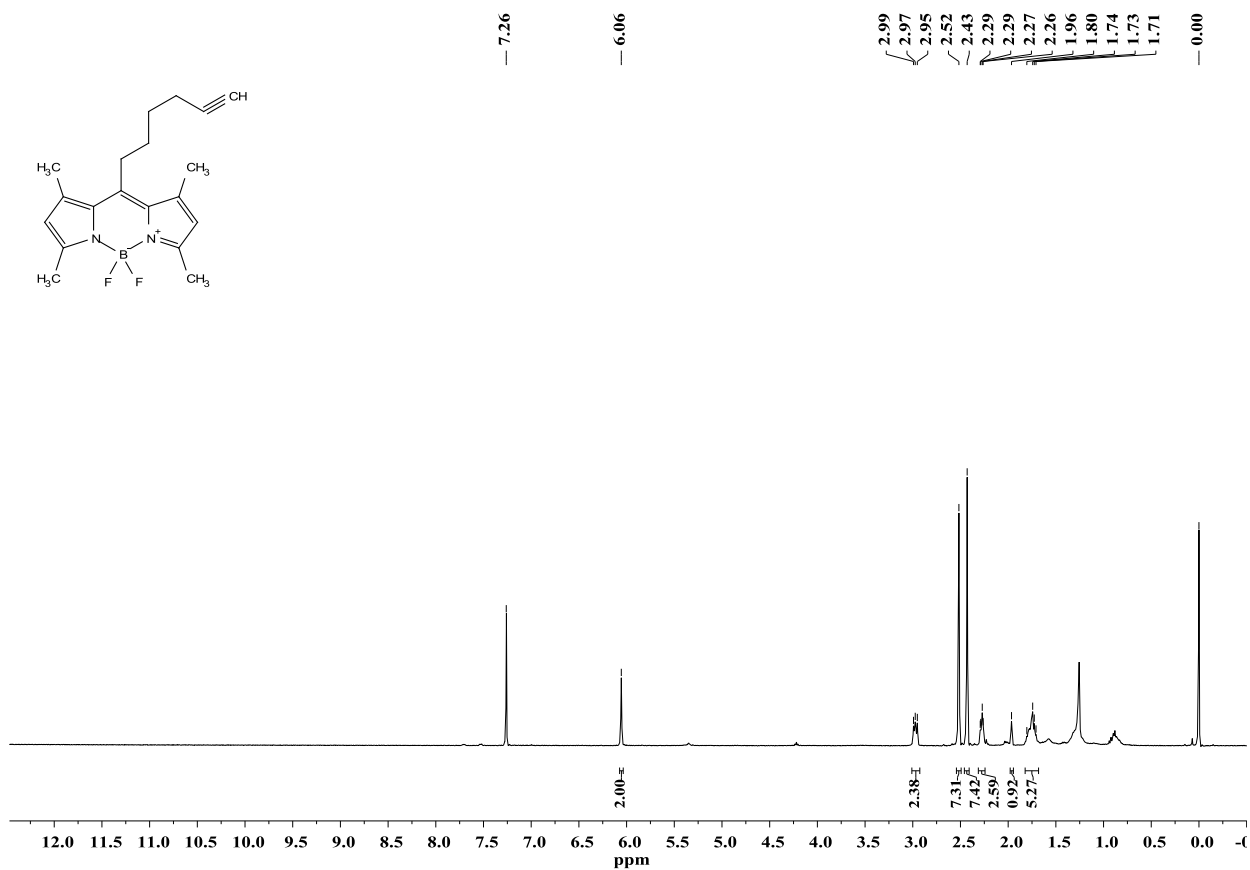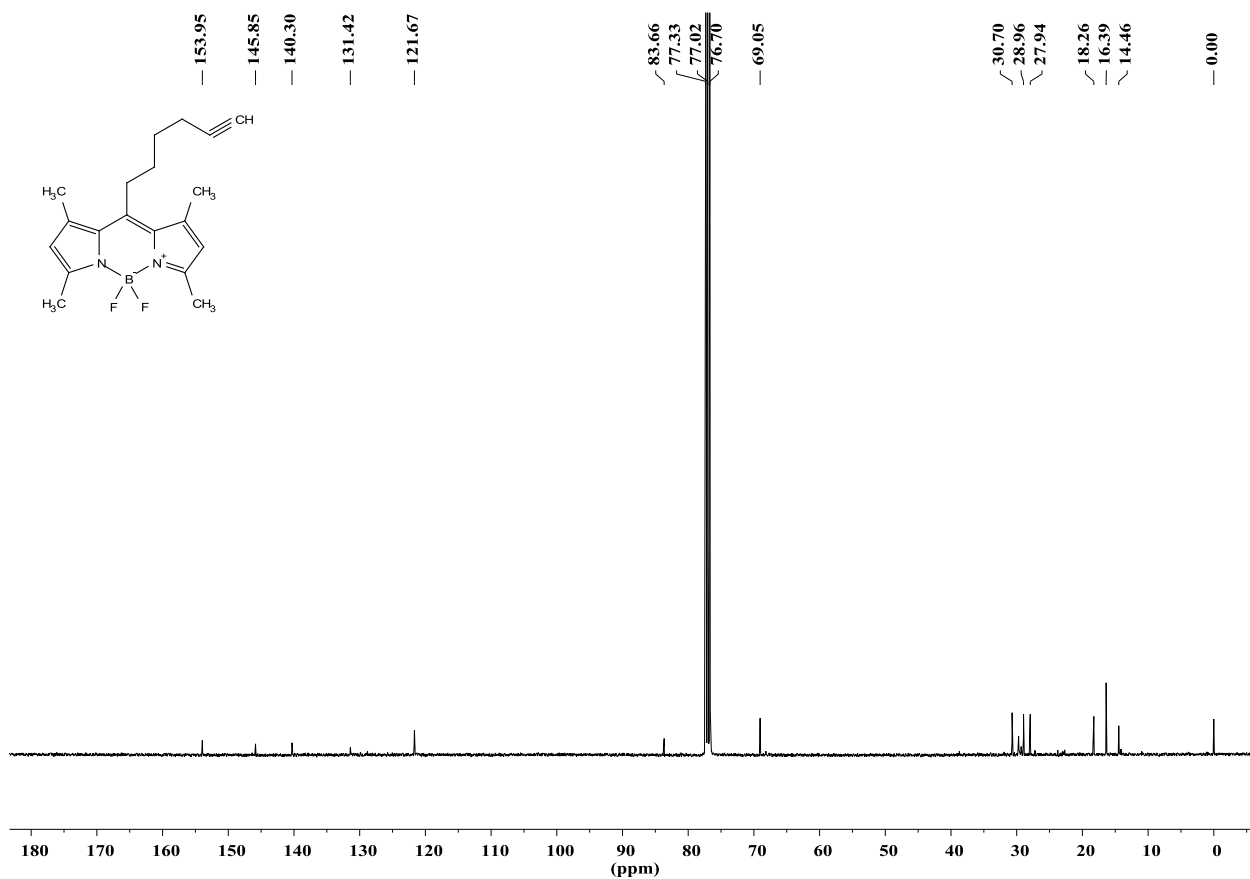

B7

8-(chloropropyl)-4,4-difluoro-1,3,5,7-tetramethyl-4-bora-3a,4a-diaza-s-indacene

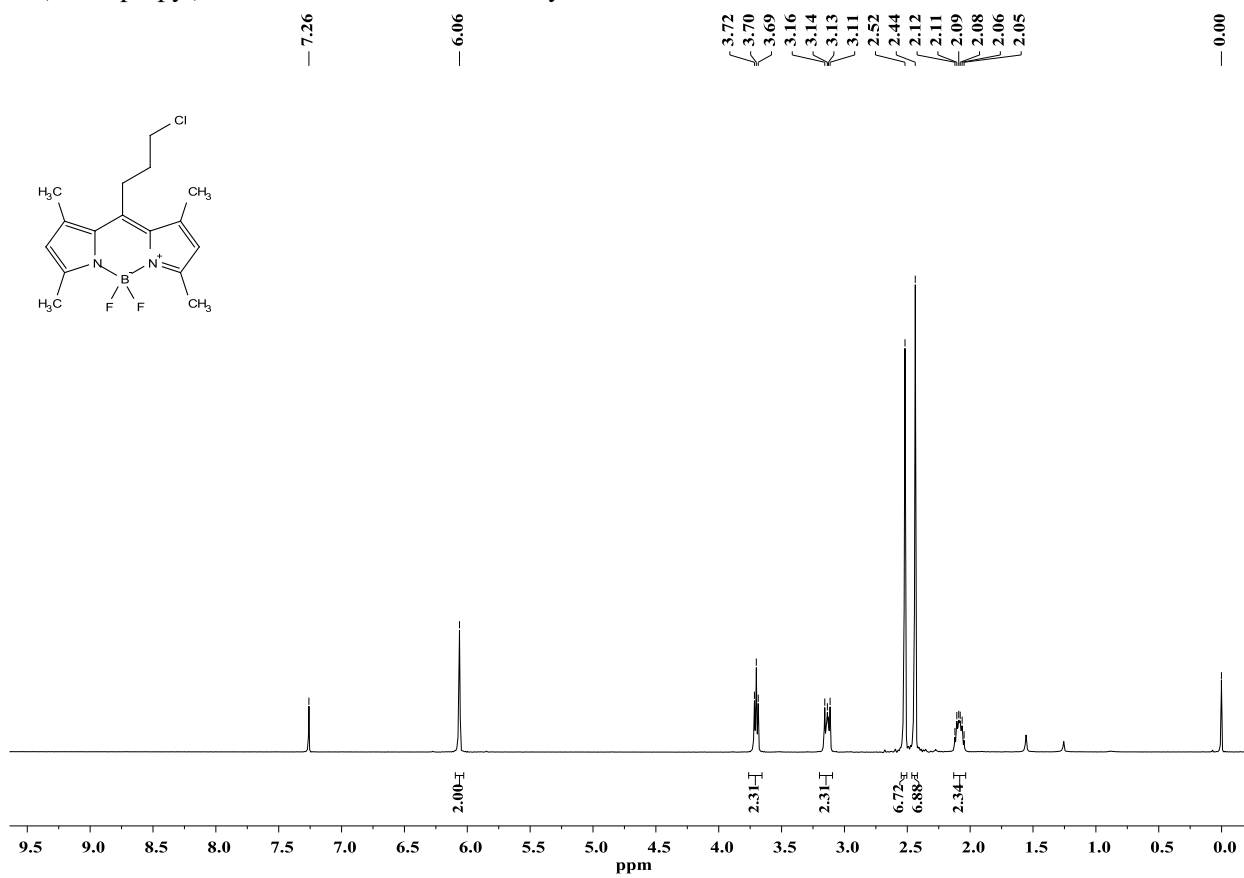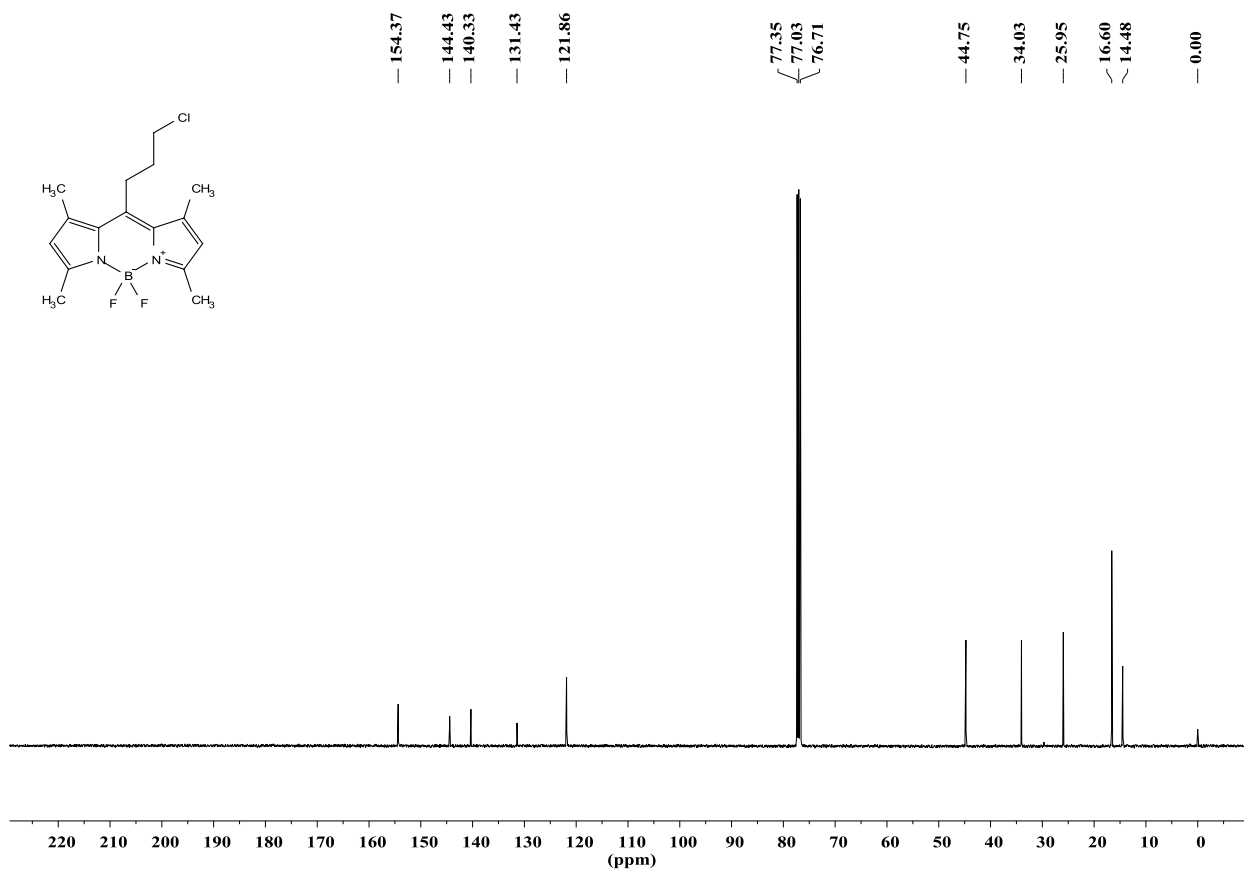

B8

8-[4-(chloromethyl)phenyl]-4,4-difluoro-1,3,5,7-tetramethyl-4-bora-3a,4a-diaza-s-indacene

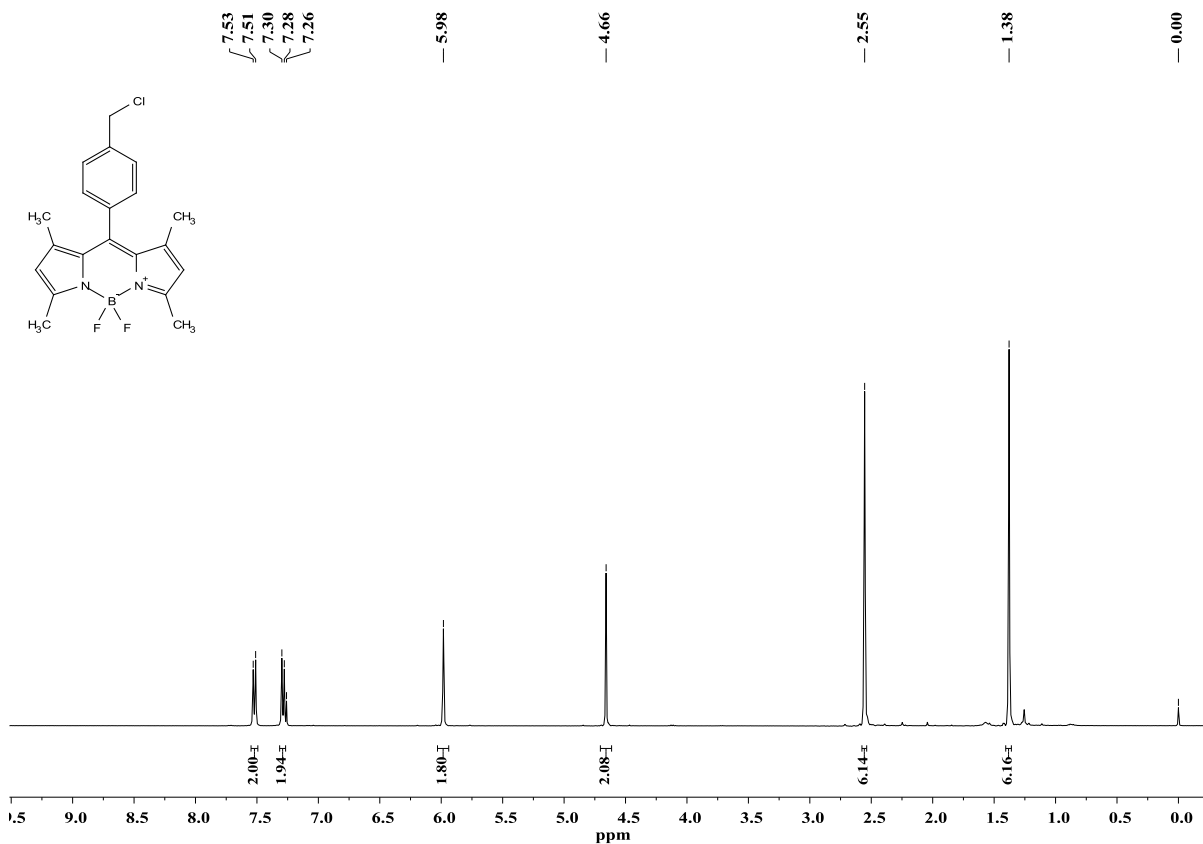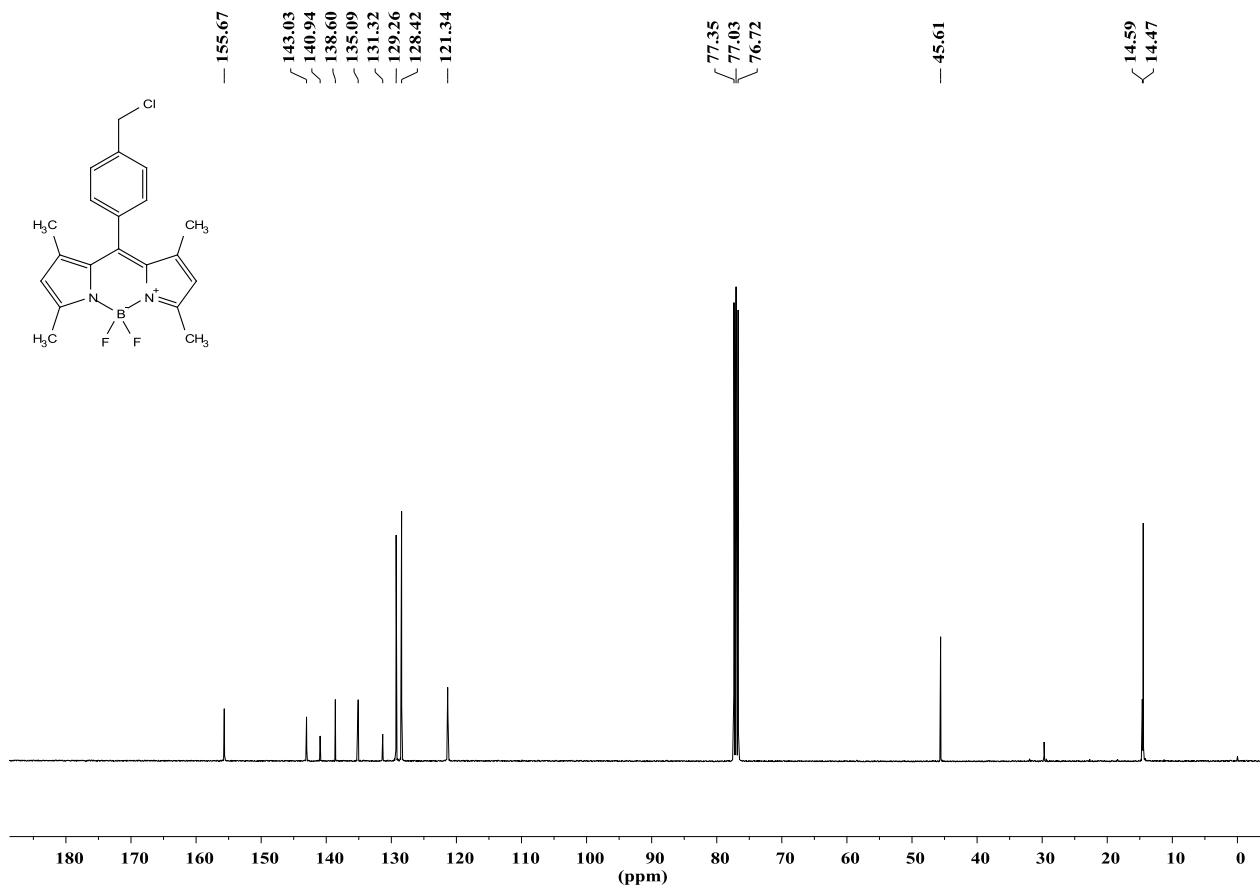

B9

4,4-difluoro-8-methyl-1,3,5,7-tetramethyl-4-bora-3a,4a-diaza-s-indacene

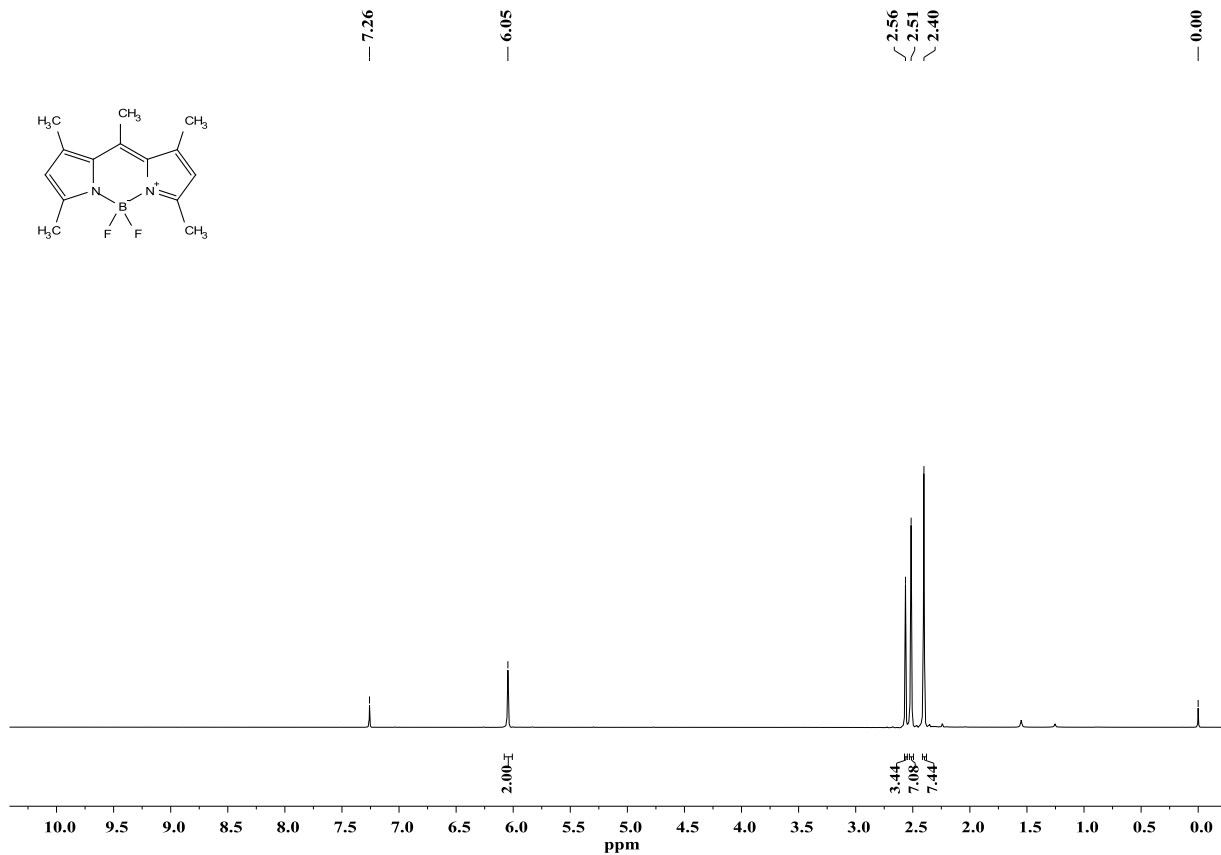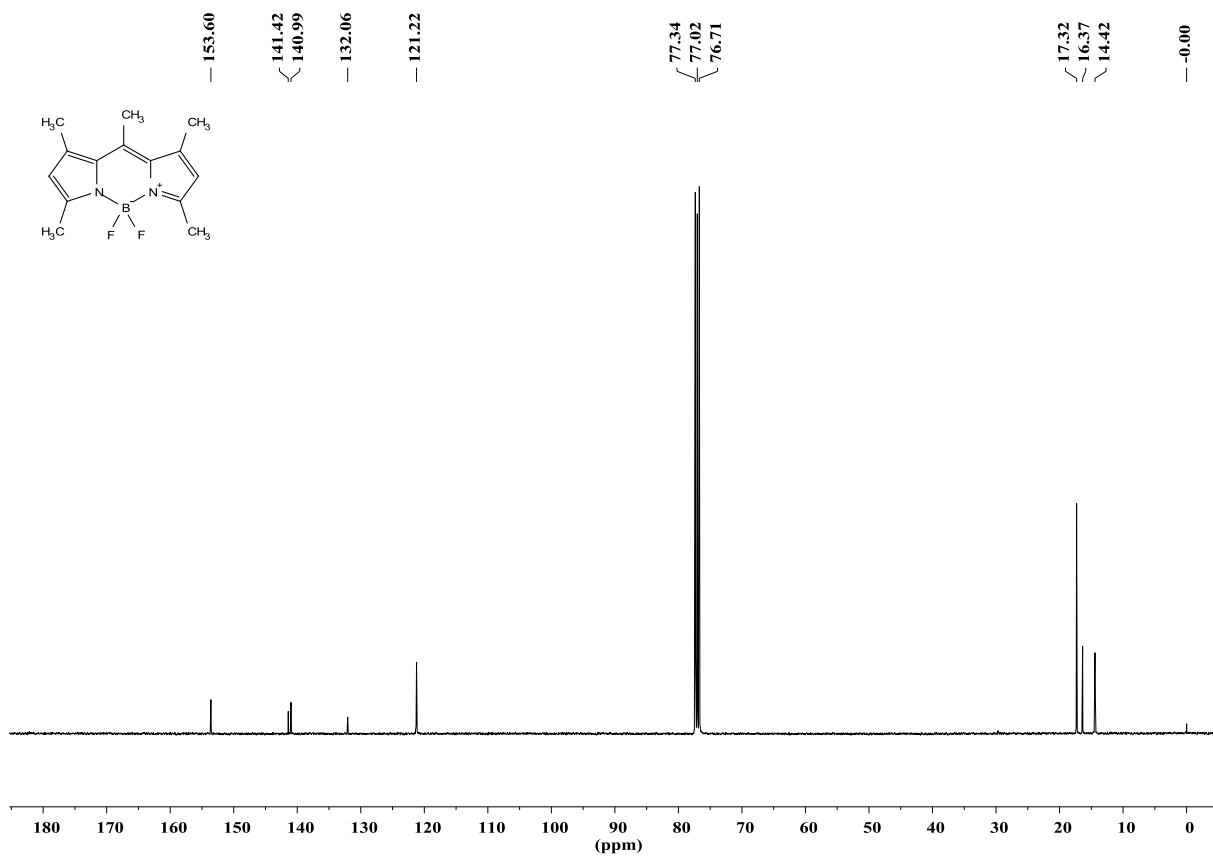

B10

8-[4-((decylamino)methyl)phenyl]-4,4-difluoro-1,3,5,7-tetramethyl-4-bora-3a,4a-diaza-s-indacene

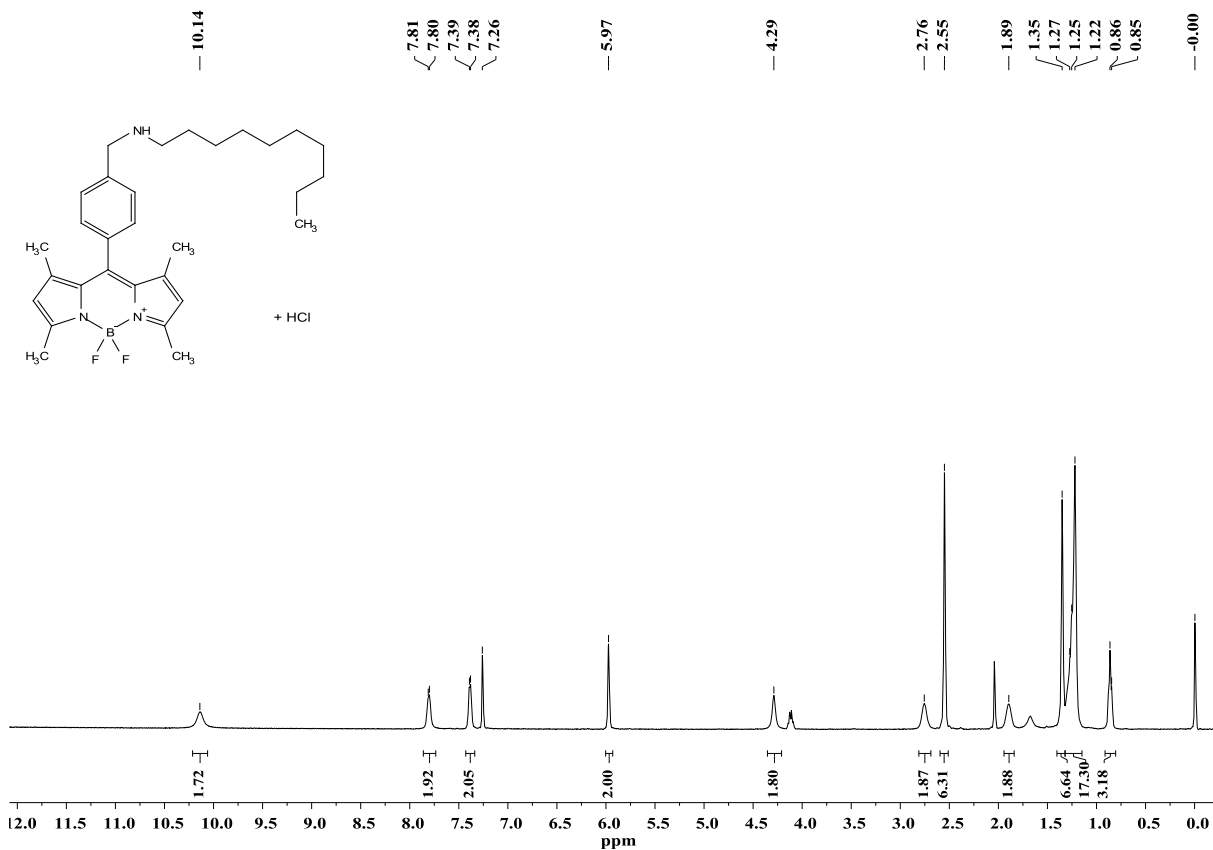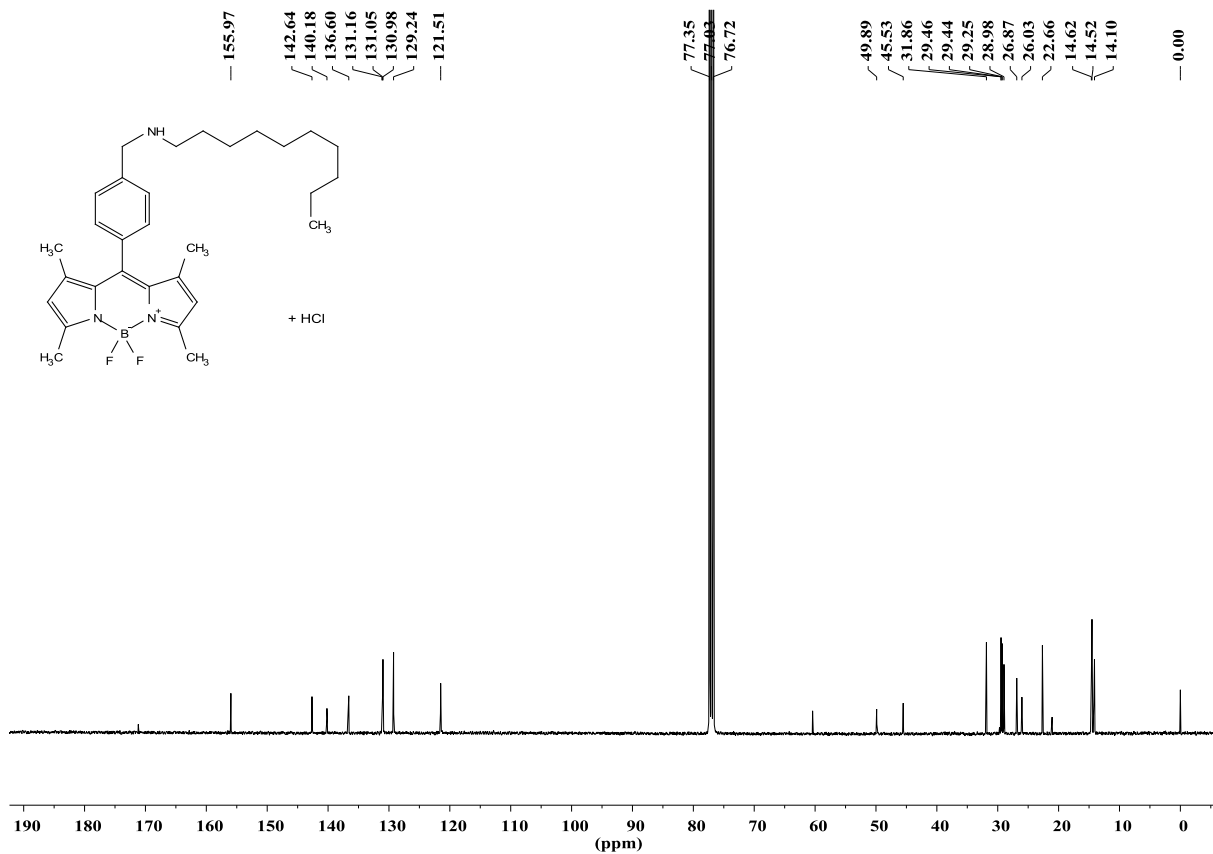



B11

8-[4-((hexylamino)methyl)phenyl]-4,4-difluoro-1,3,5,7-tetramethyl-4-bora-3a,4a-diaza-s-indacene

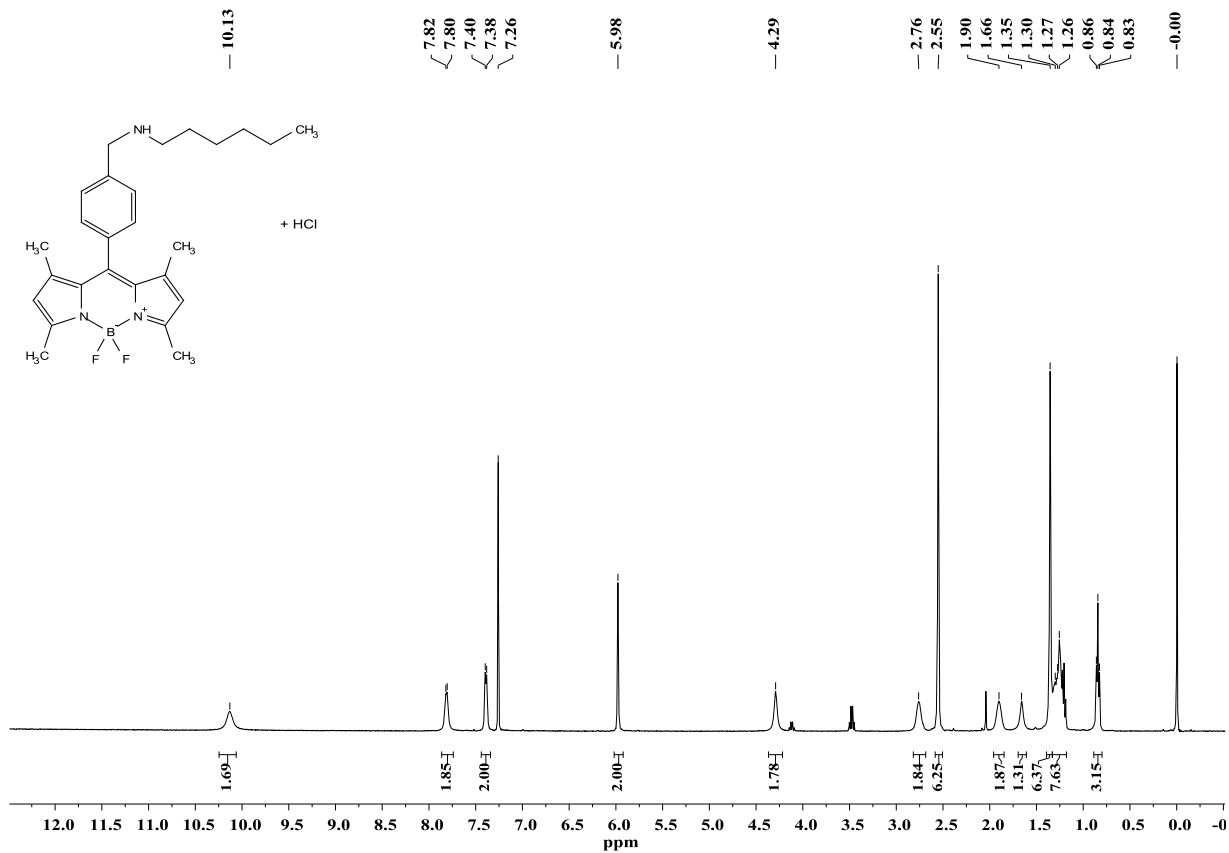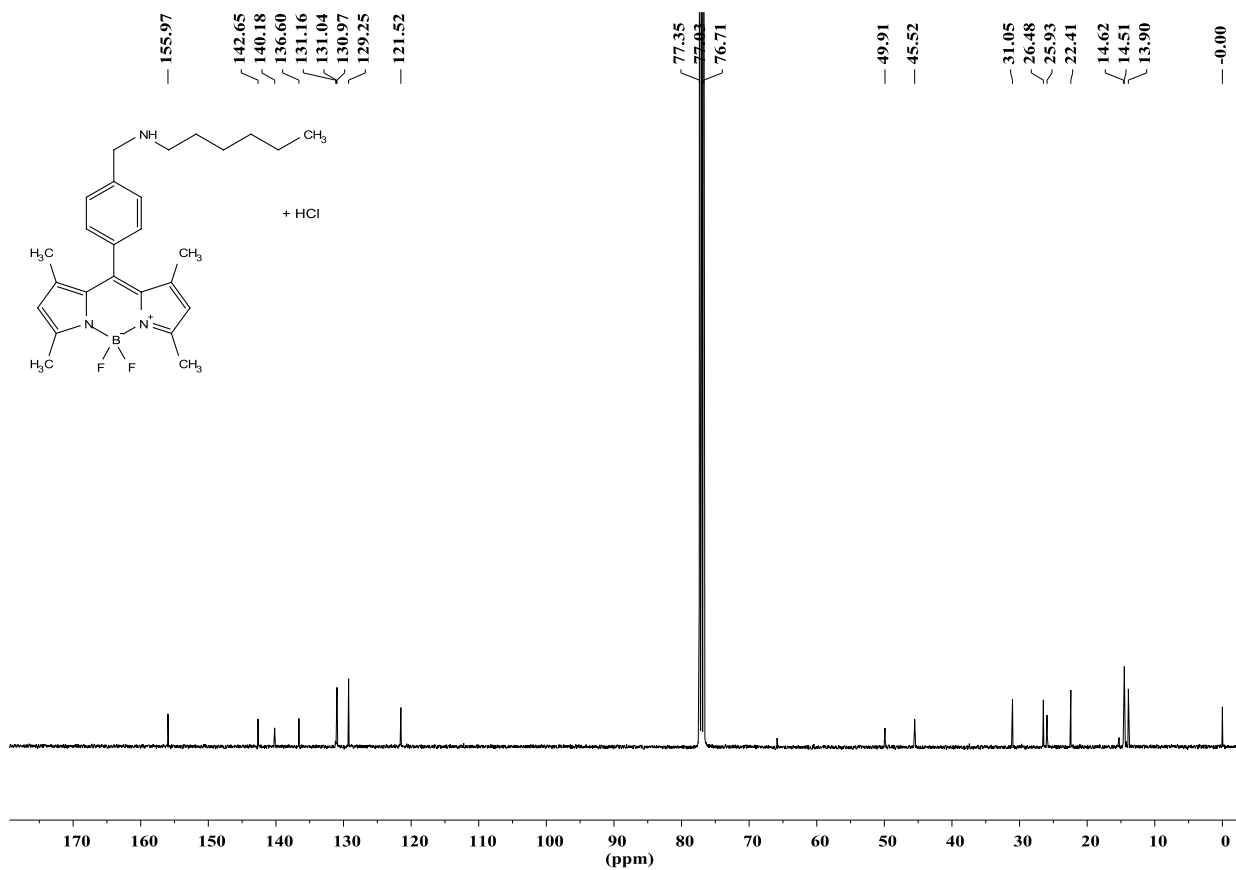

B12

8-[4-((dodecylamino)methyl)phenyl]-4,4-difluoro-1,3,5,7-tetramethyl-4-bora-3a,4a-diaza-s-indacene

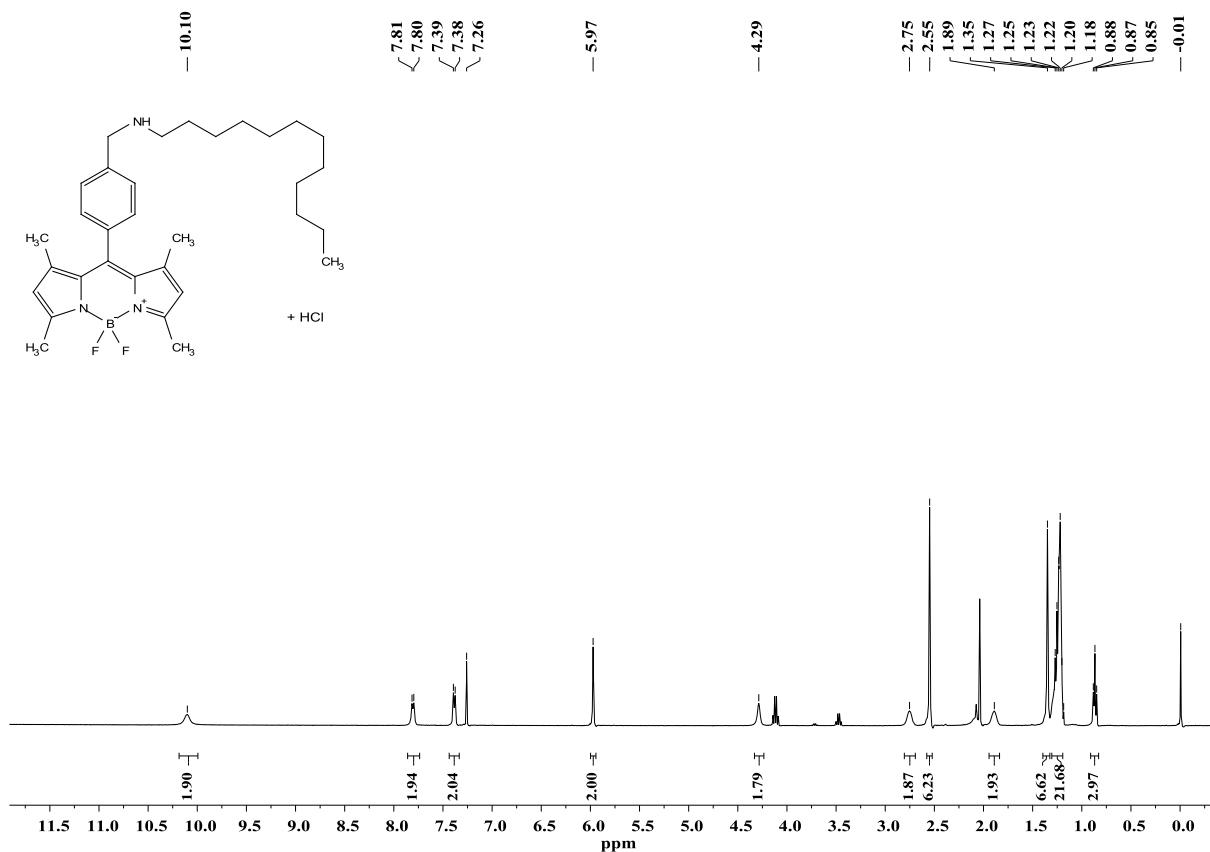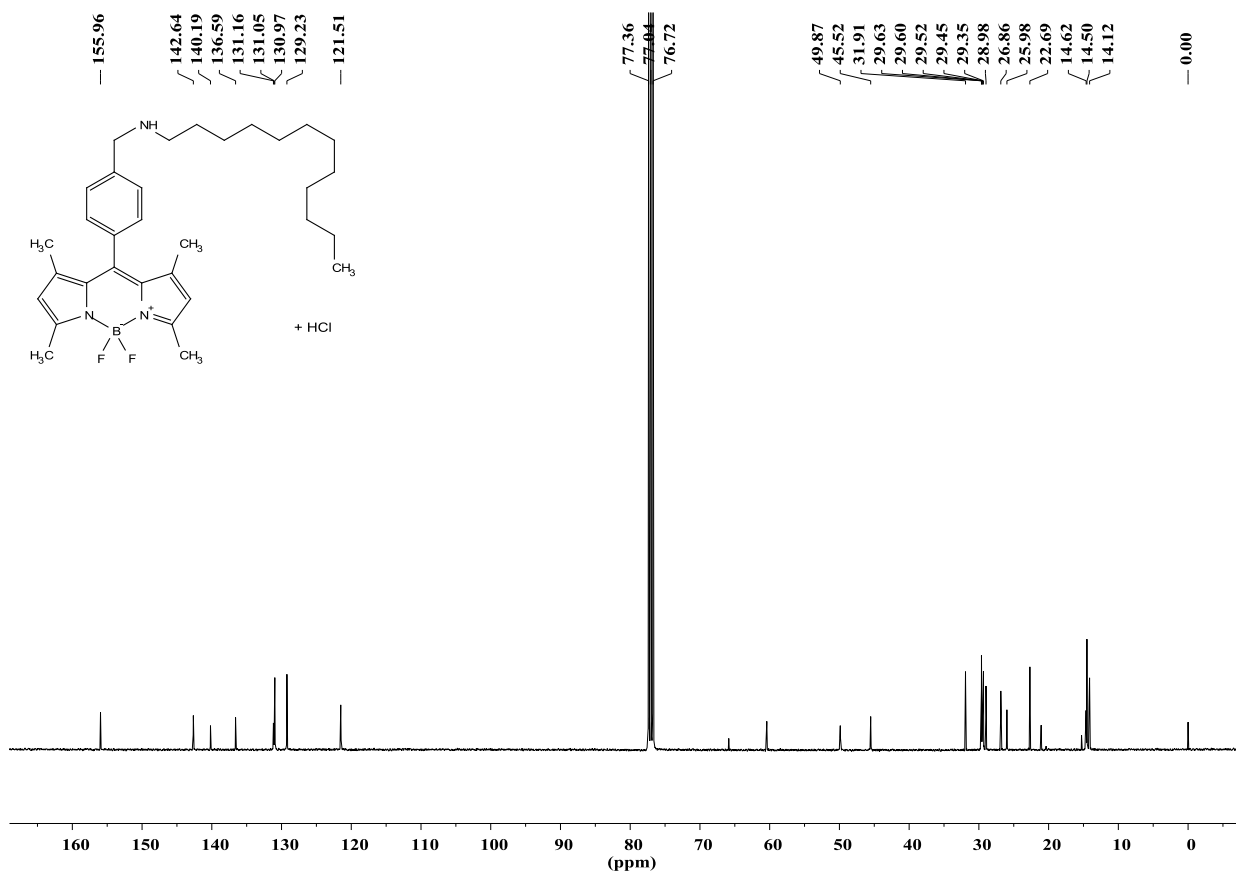

B13

8-[4-(((10-aminodecyl)amino)methyl)phenyl]-4,4-difluoro-1,3,5,7-tetramethyl-4-bora-3a,4a-diaza-s-indacene

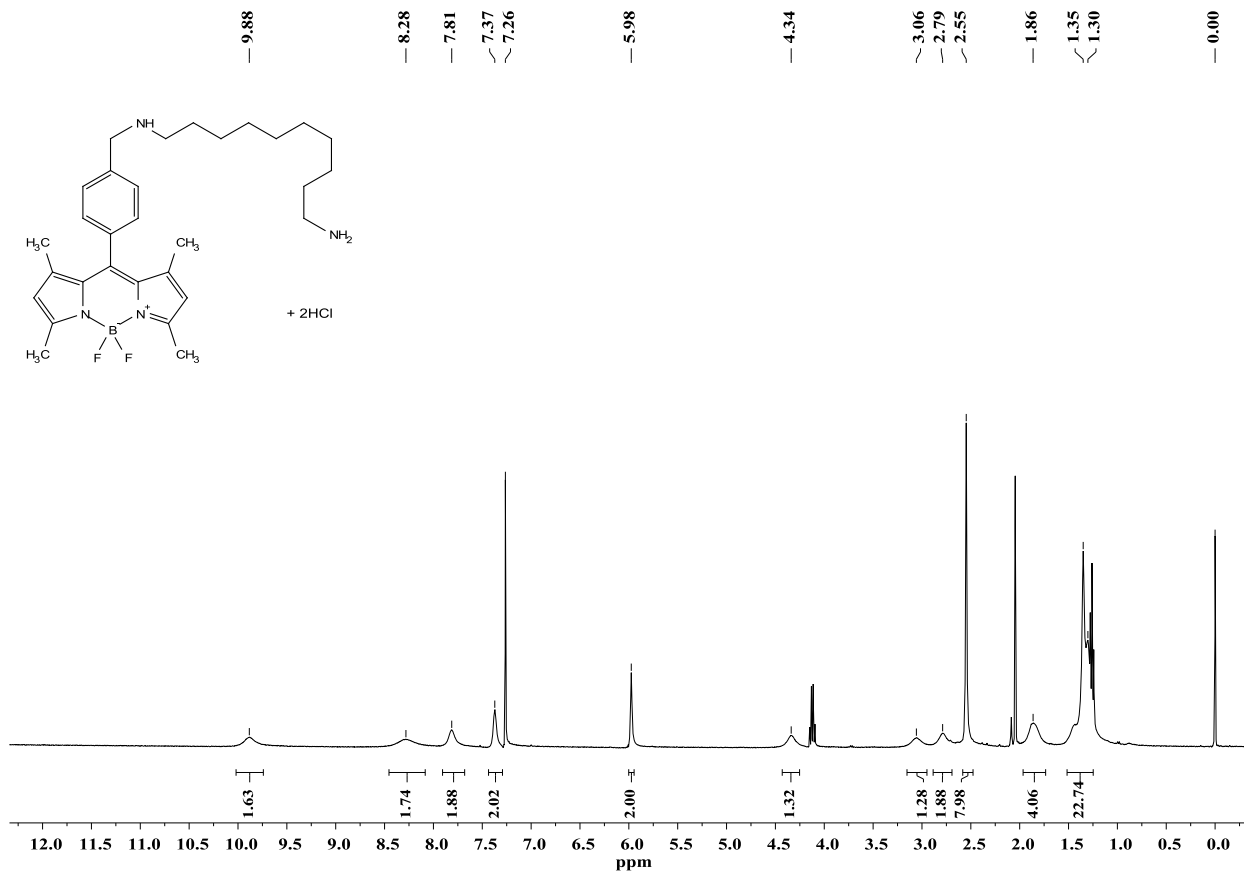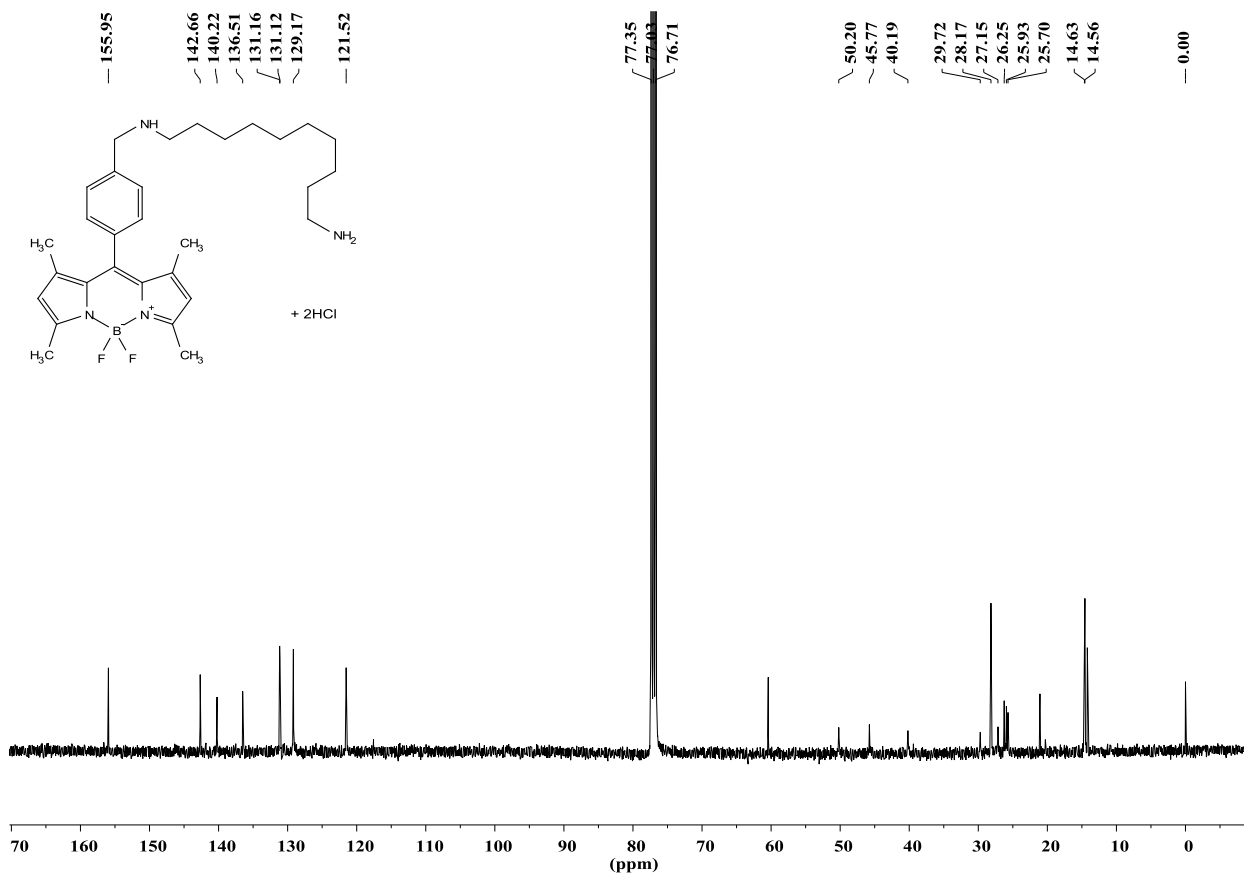

## Copy of NMR spectra of series 2

### 5-(Dimethylamino)-*N*-propylnaphthalene-1-sulfonamide (D1)

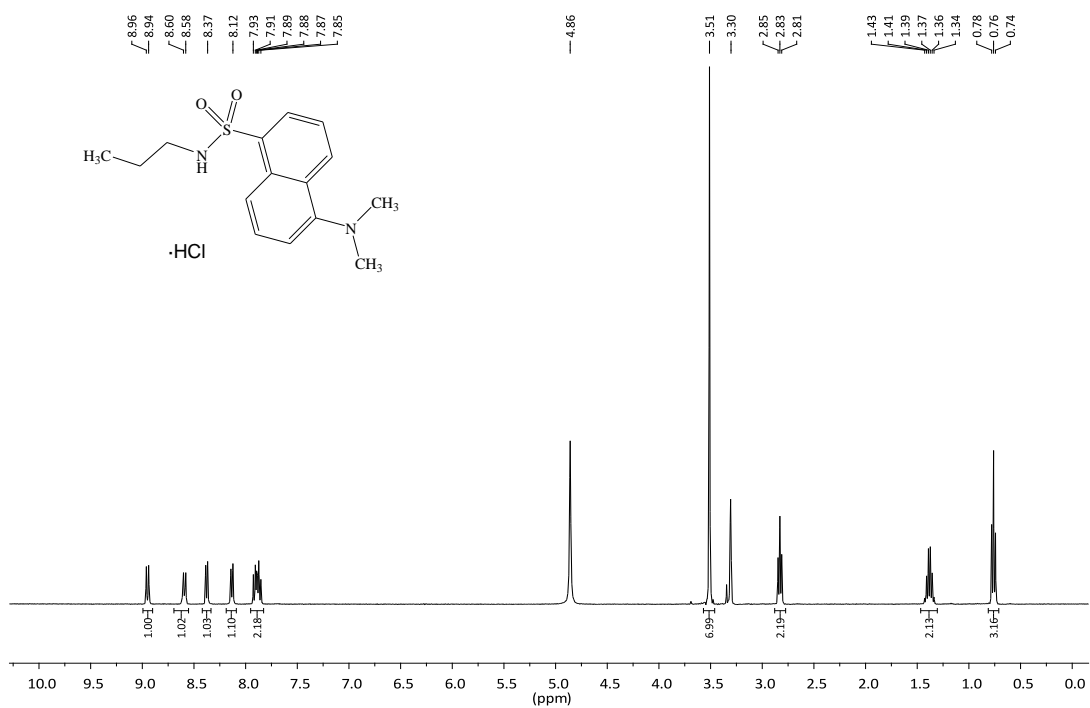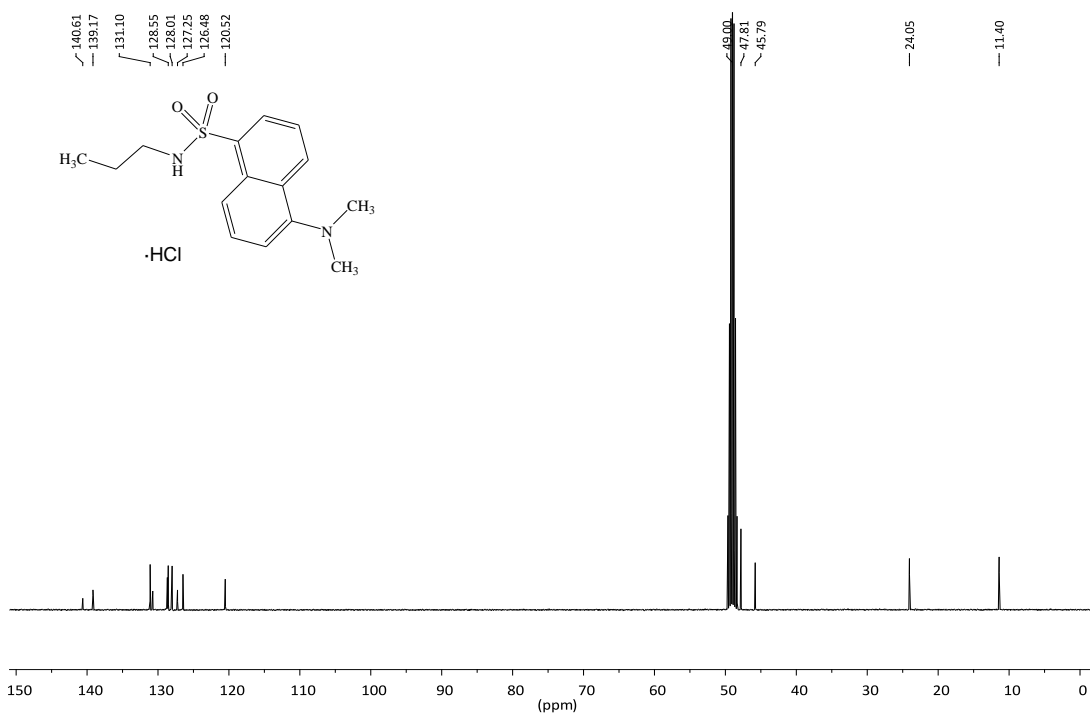

5-(Dimethylamino)-*N*-hexylnaphthalene-1-sulfonamide (D2)

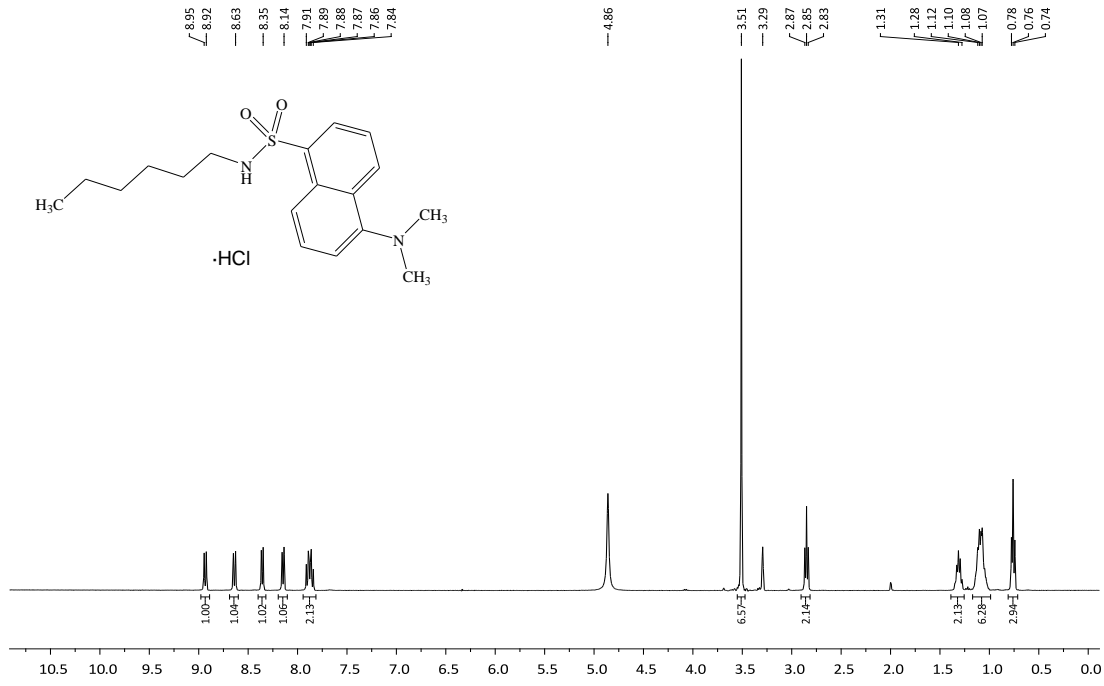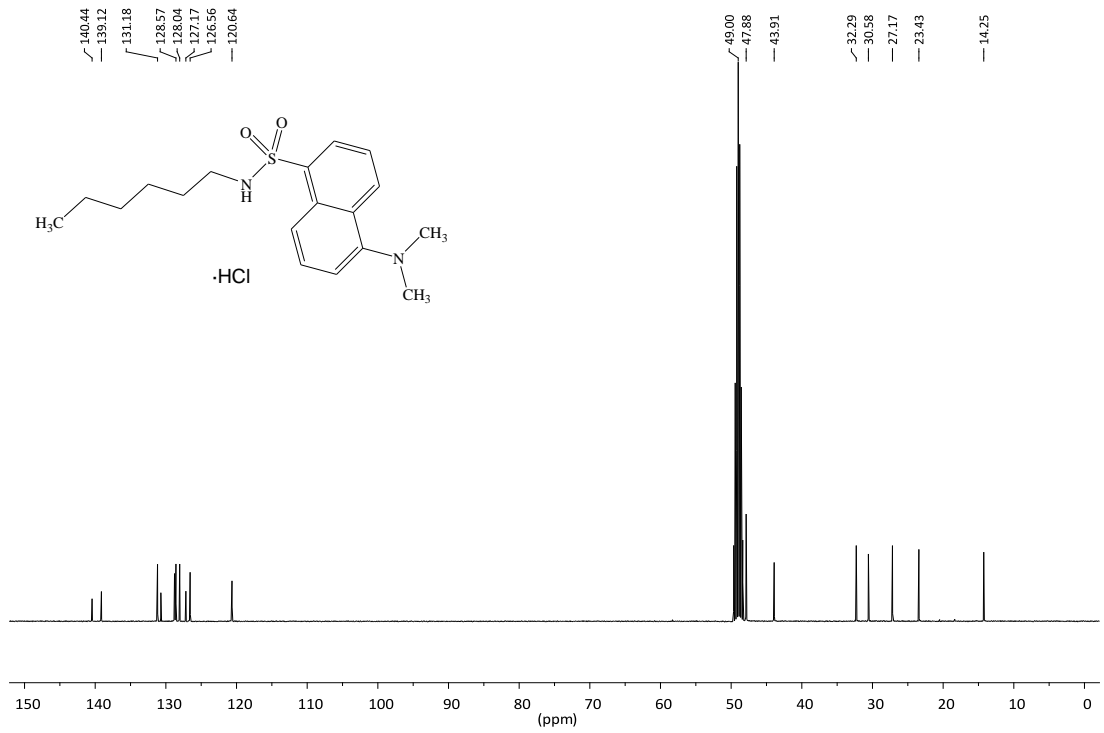

*N*-decyl-5-(dimethylamino) naphthalene-1-sulfonamide (D3)

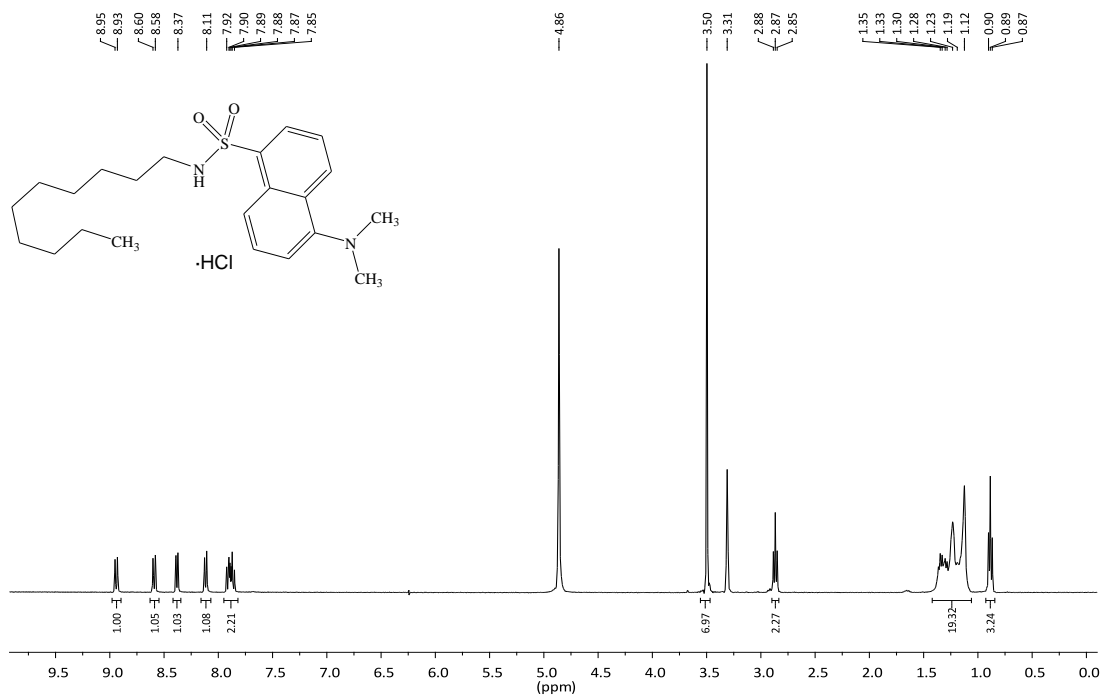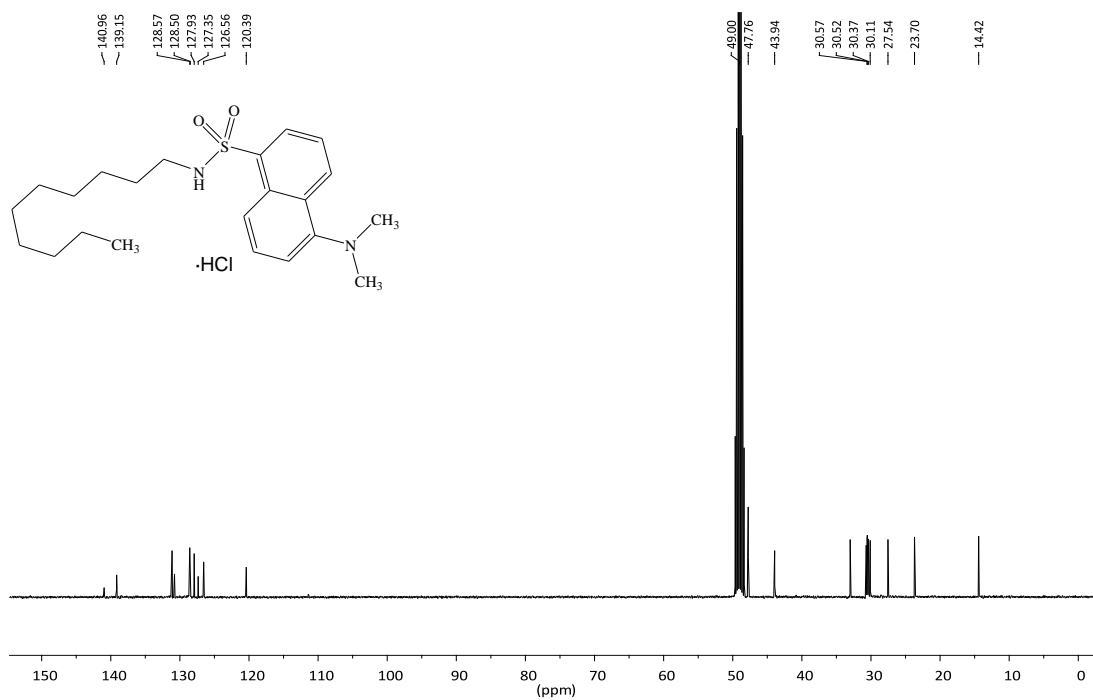

(Z)-5-(dimethylamino)-N-(octadec-9-en-1-yl) naphthalene-1-sulfonamide (D4)

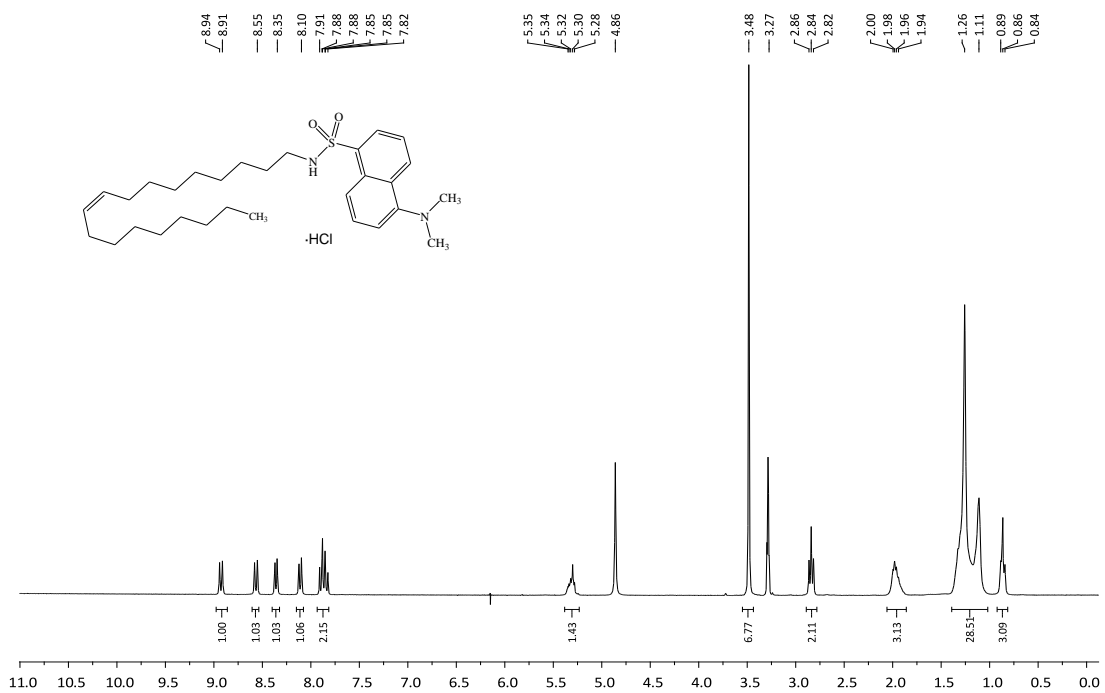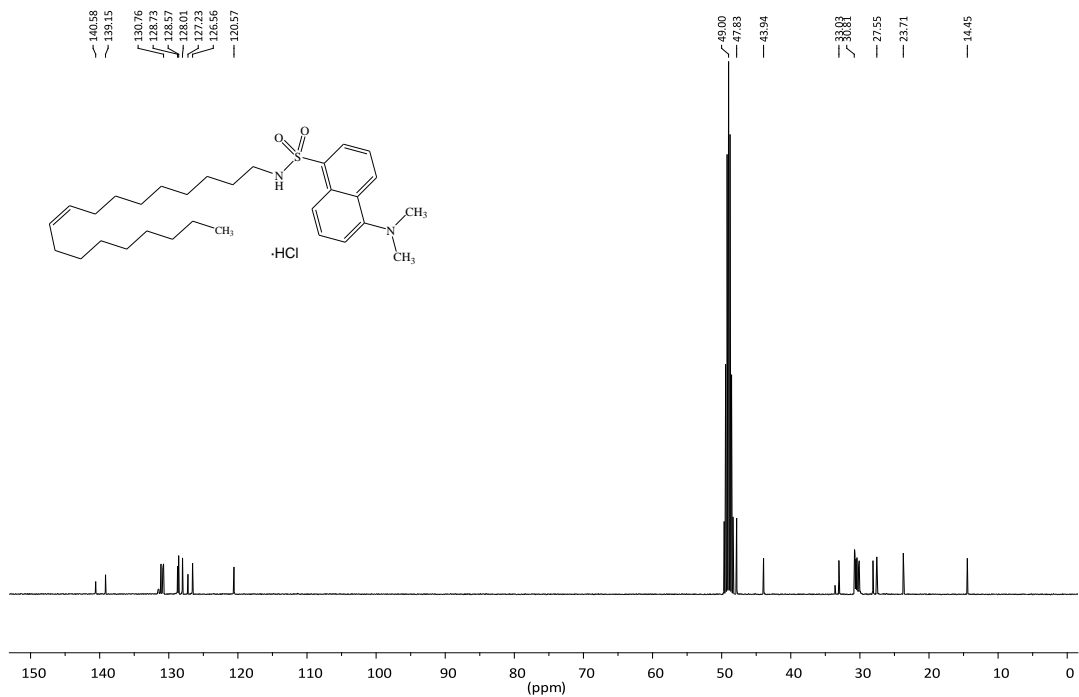

*N, N'*-didecyl-5-(dimethylamino) naphthalene-1-sulfonamide (D5)

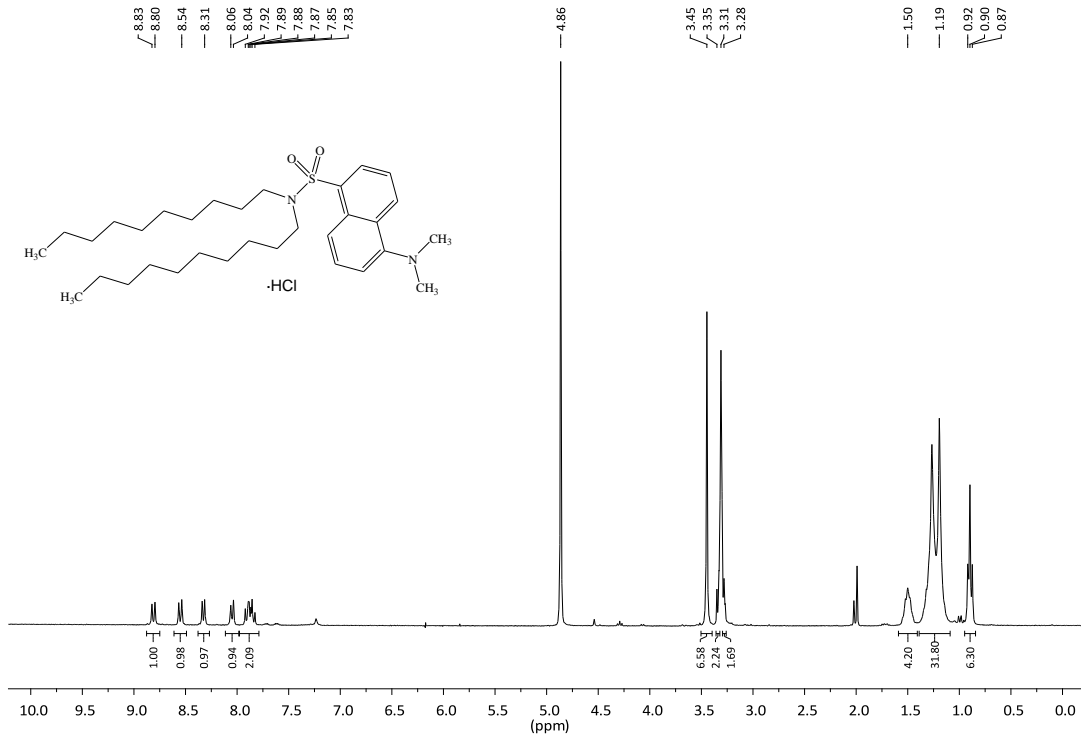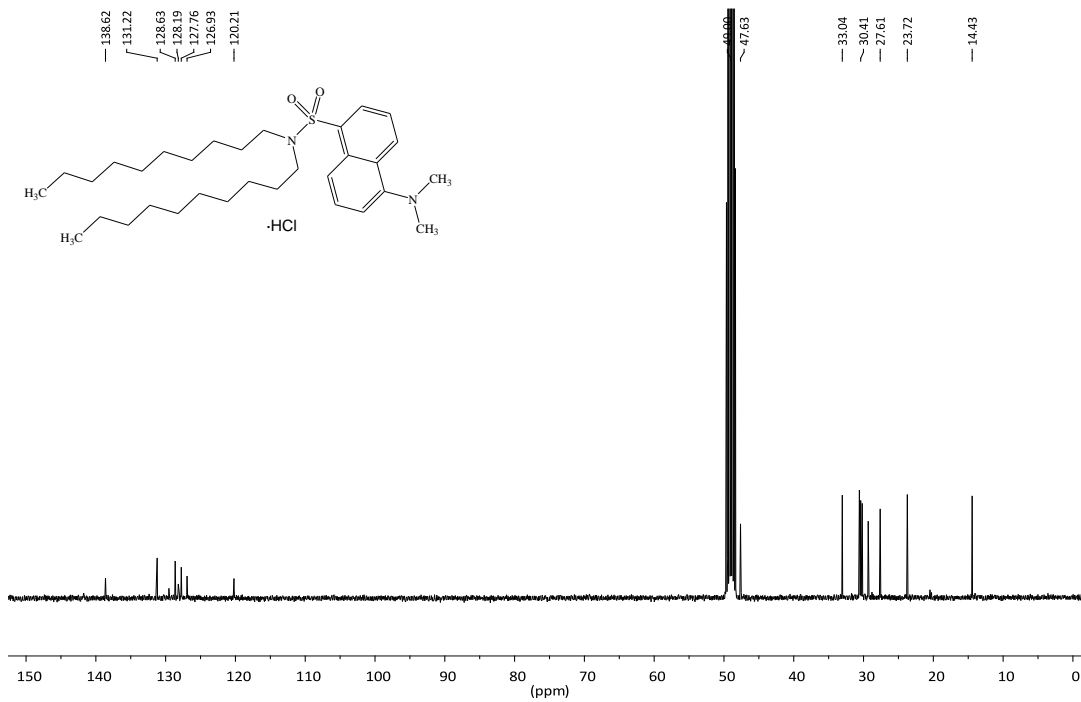



*N*-(2-aminoethyl)-5-(dimethylamino) naphthalene-1-sulfonamide (D6)

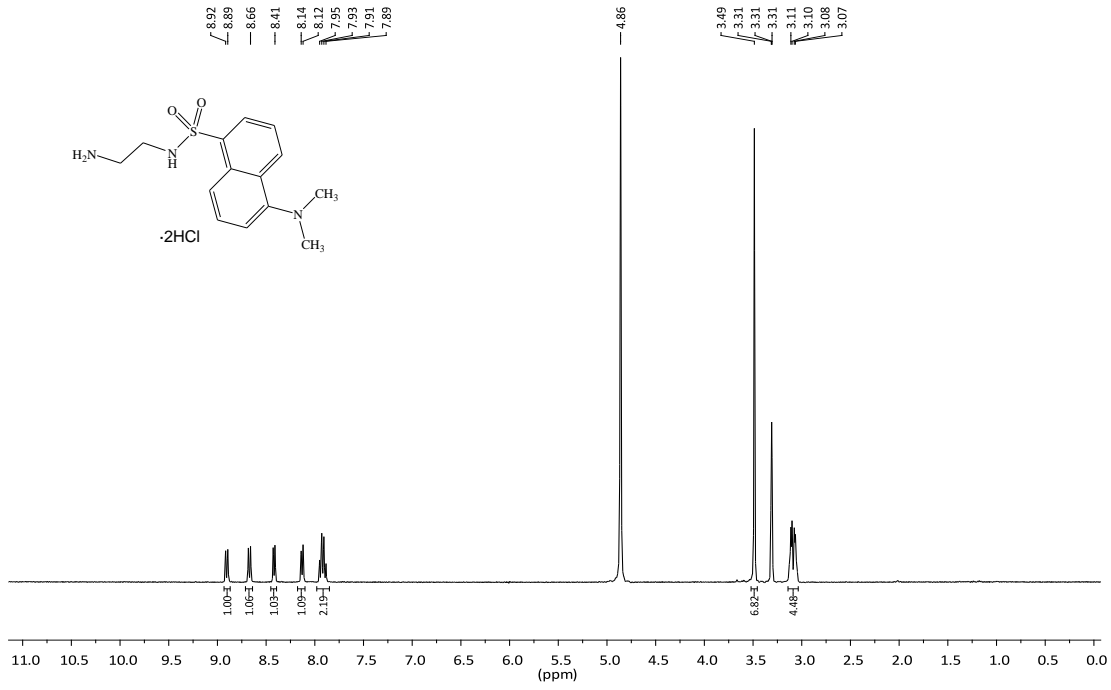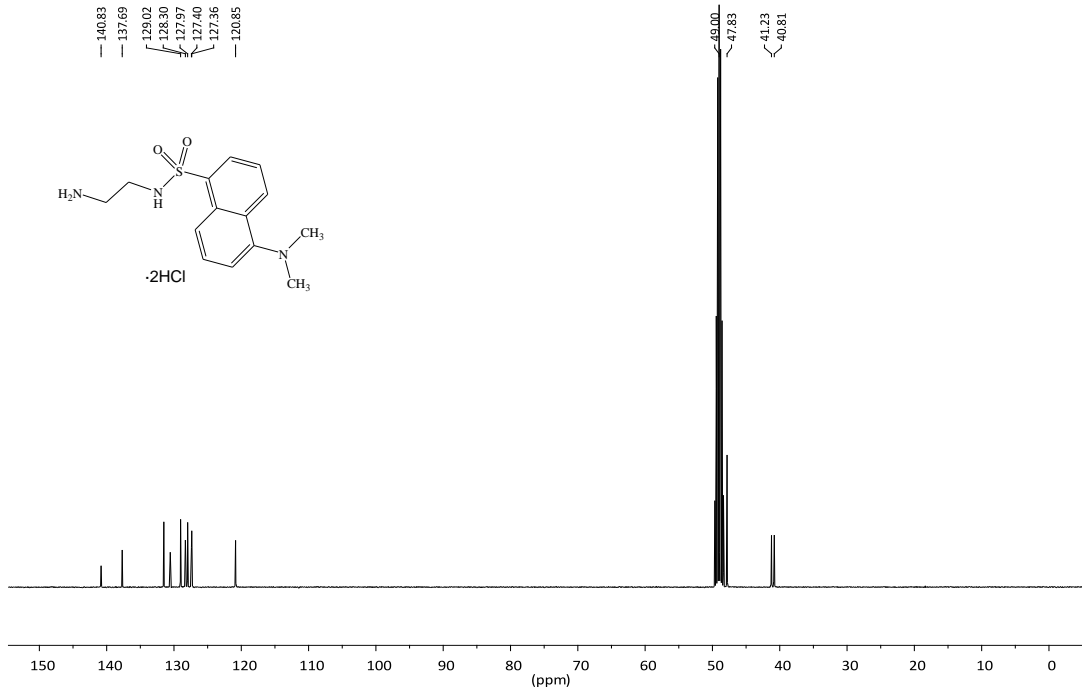

5-(Dimethylamino)-N-(4-hydroxybutyl) naphthalene-1-sulfonamide (D7)

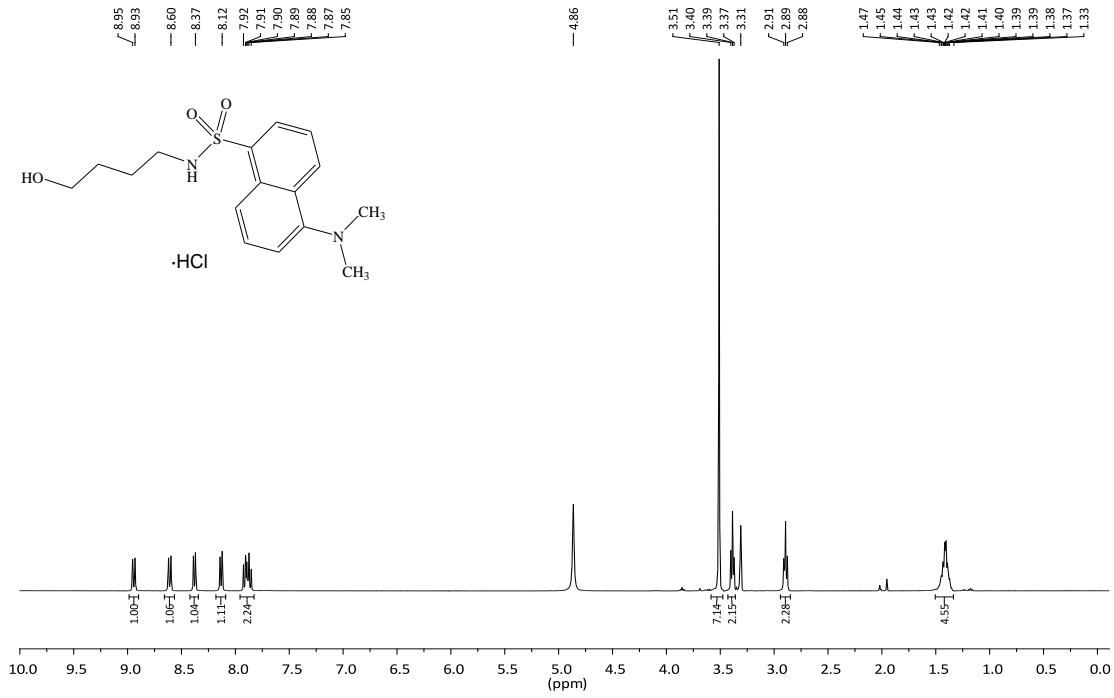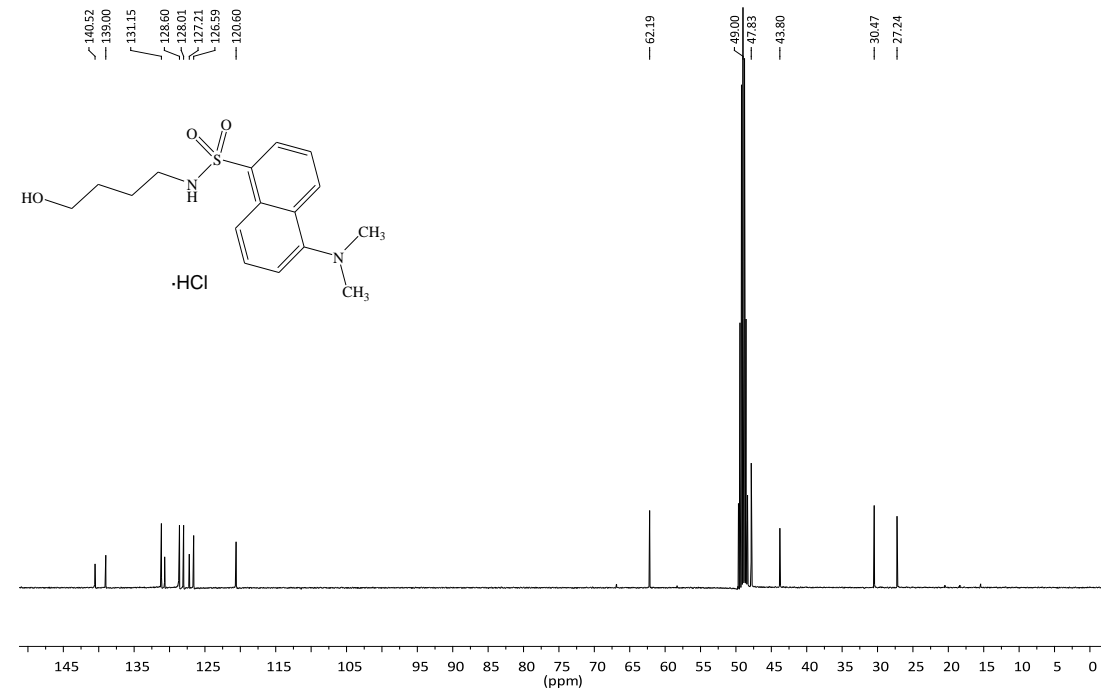

*N*-(6-aminohexyl)-5-(dimethylamino) naphthalene-1-sulfonamide (D8)

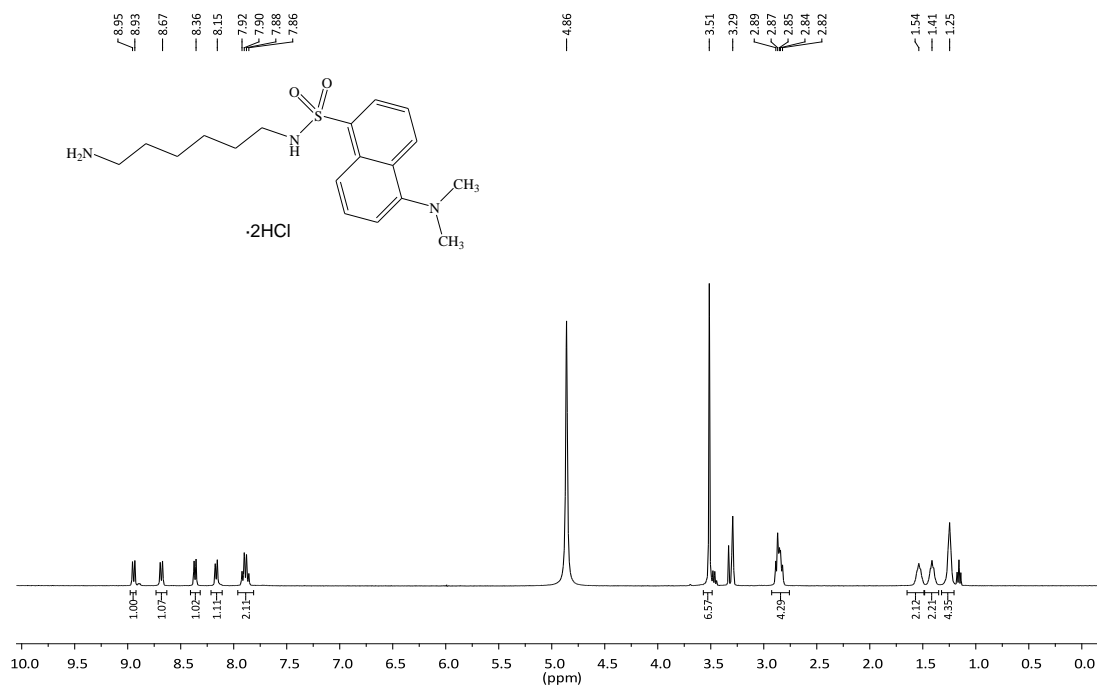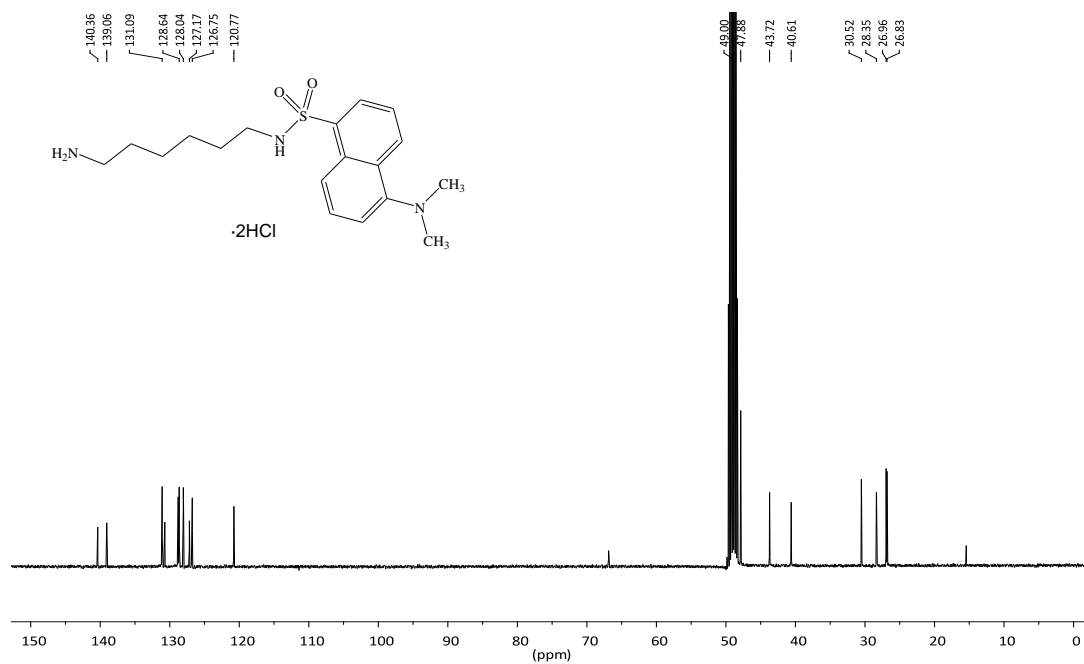

*N*-(8-aminoctyl)-5-(dimethylamino) naphthalene-1-sulfonamide (D9)

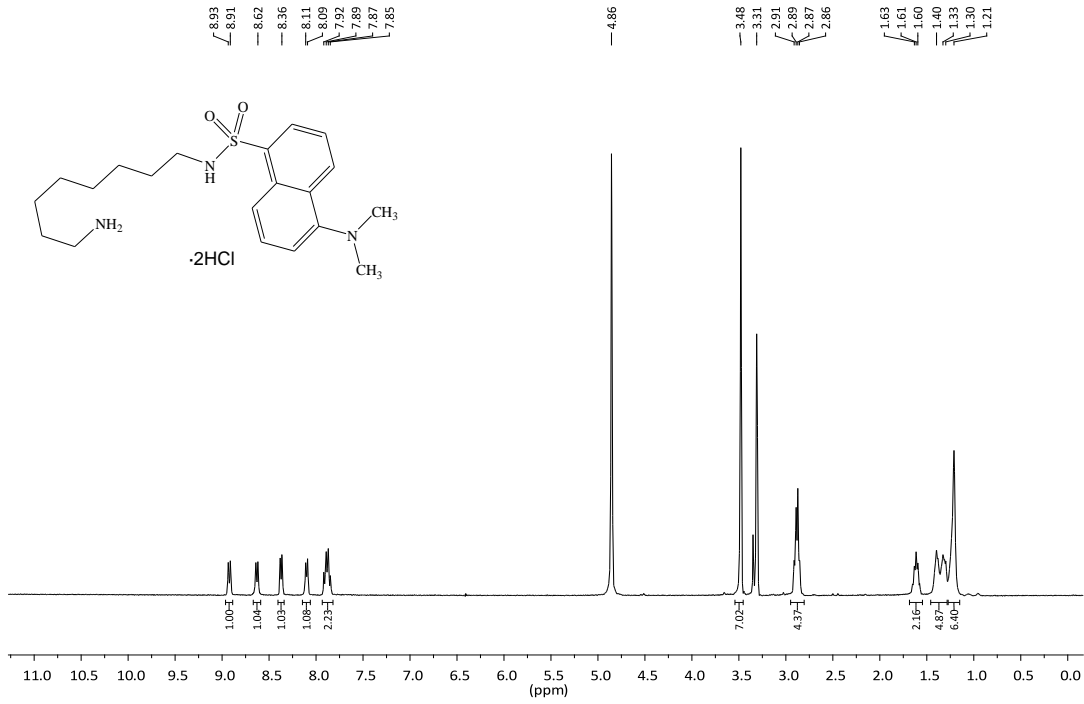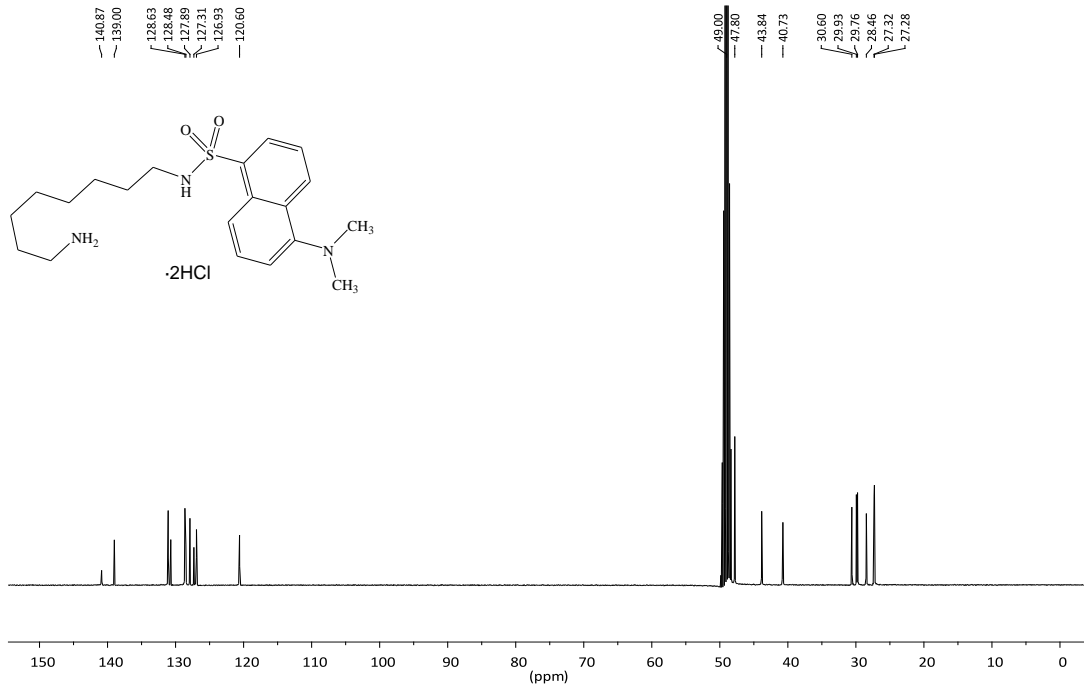

*N*-(2-(2-(2-aminoethoxy)ethoxy)ethyl)-5-(dimethylamino)naphthalene-1-sulfonamide (D10)

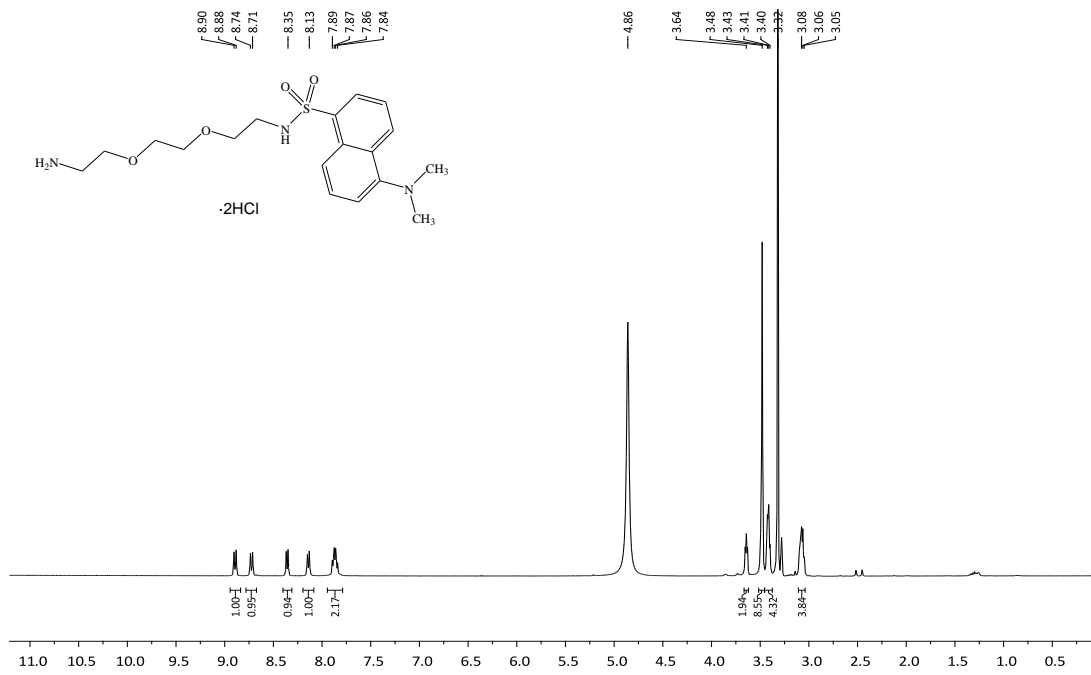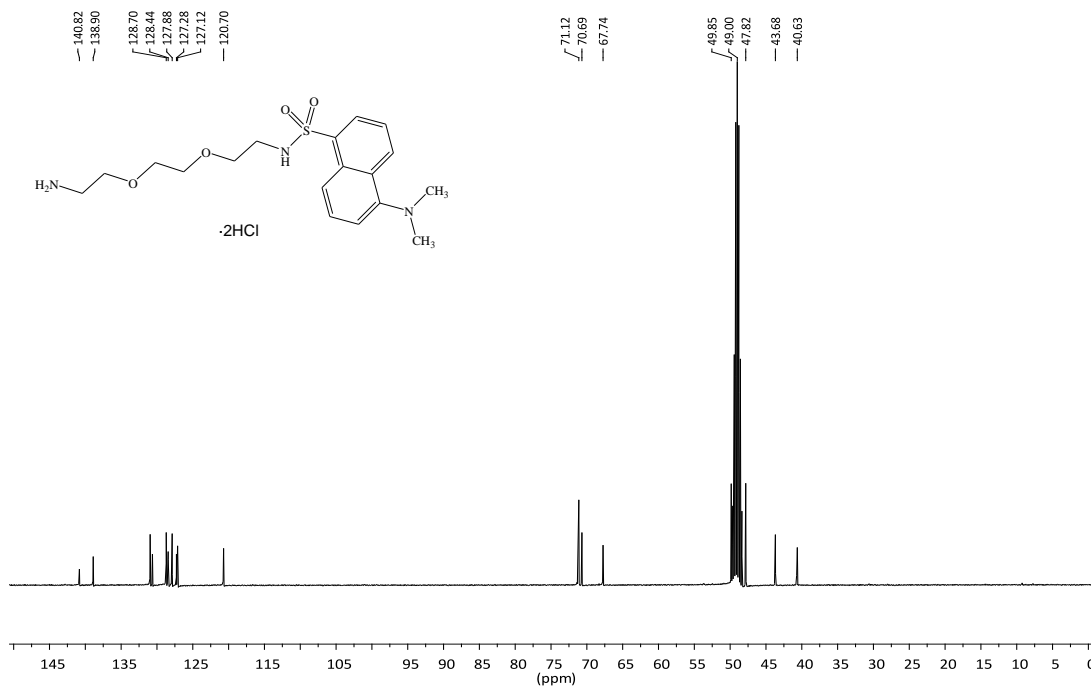

*N*-(10-aminodecyl)-5-(dimethylamino) naphthalene-1-sulfonamide (D11)

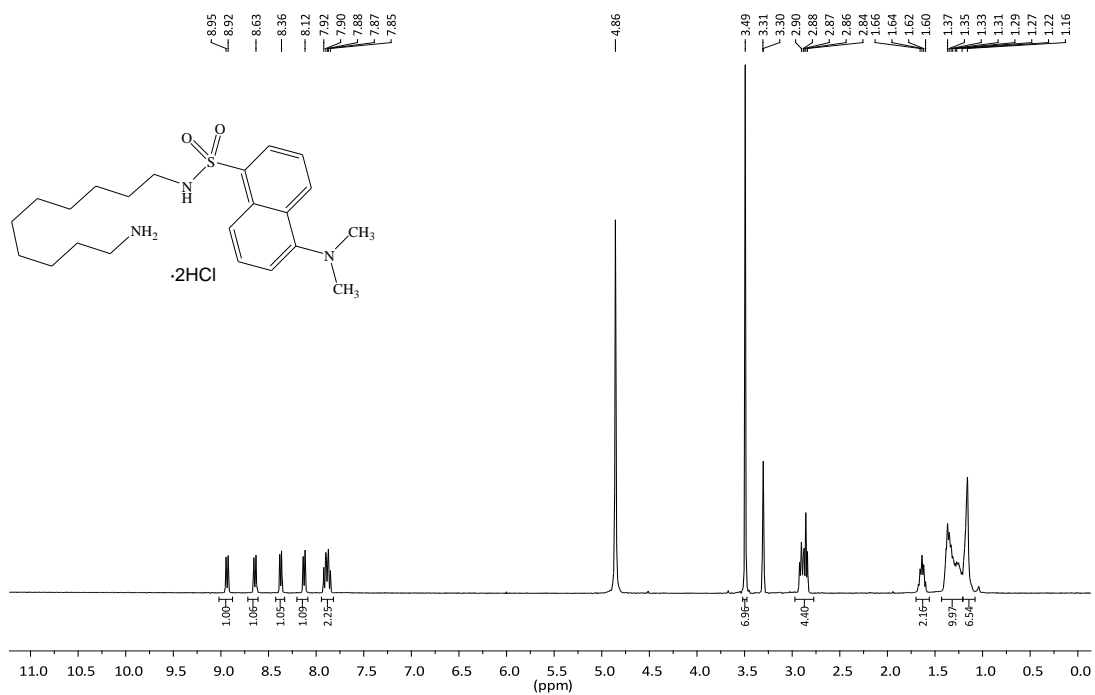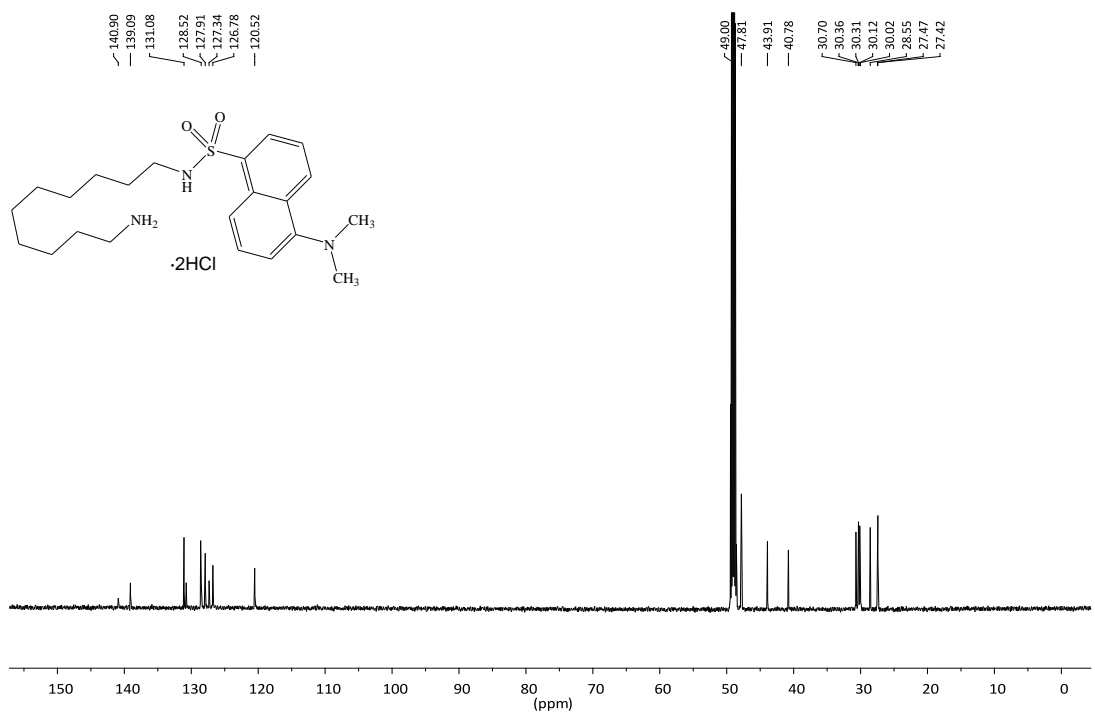

*N*-(12-aminododecyl)-5-(dimethylamino) naphthalene-1-sulfonamide (D12)

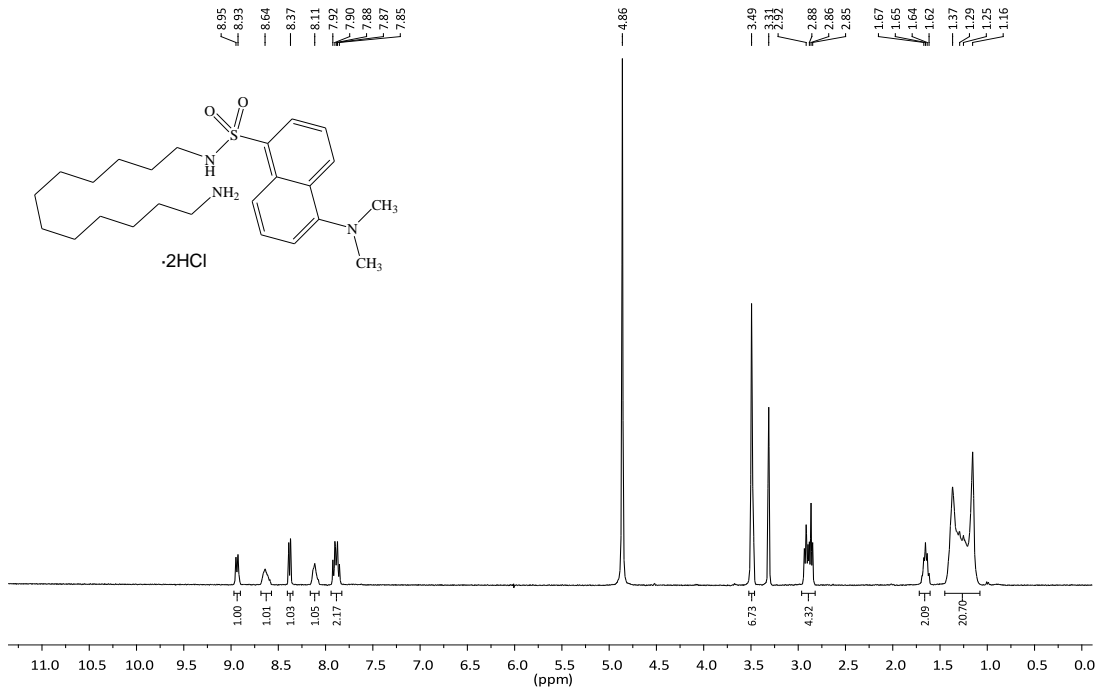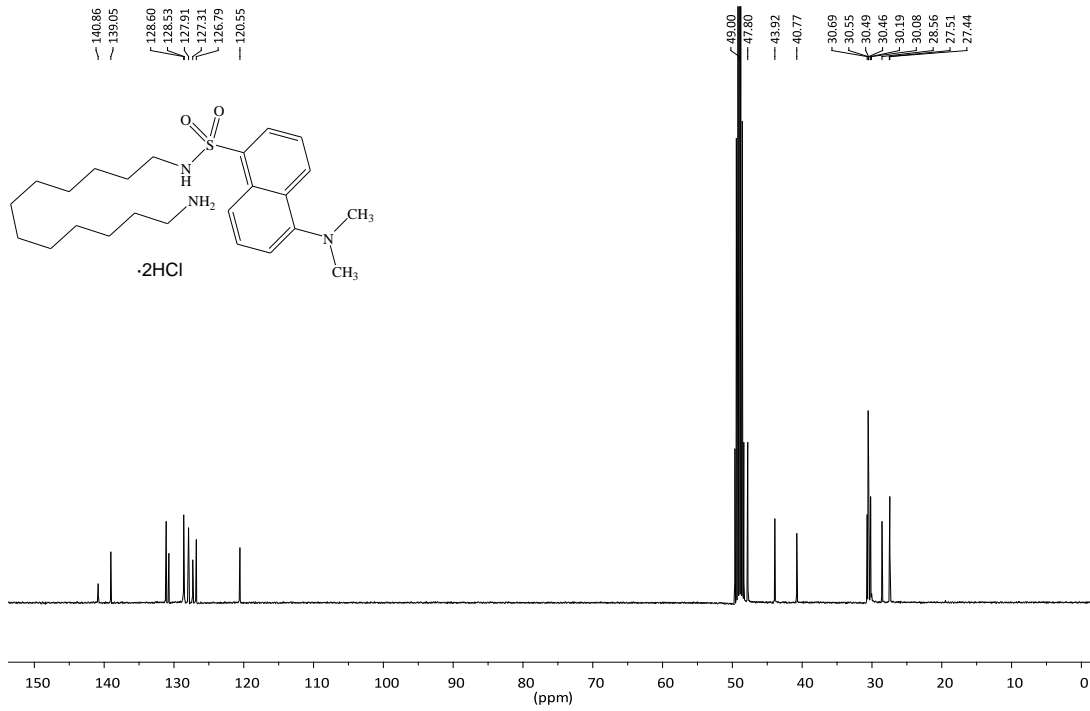

*N, N'*-(ethane-1, 2-diyl) bis(5-(dimethylamino)naphthalene-1-sulfonamide) (D13)

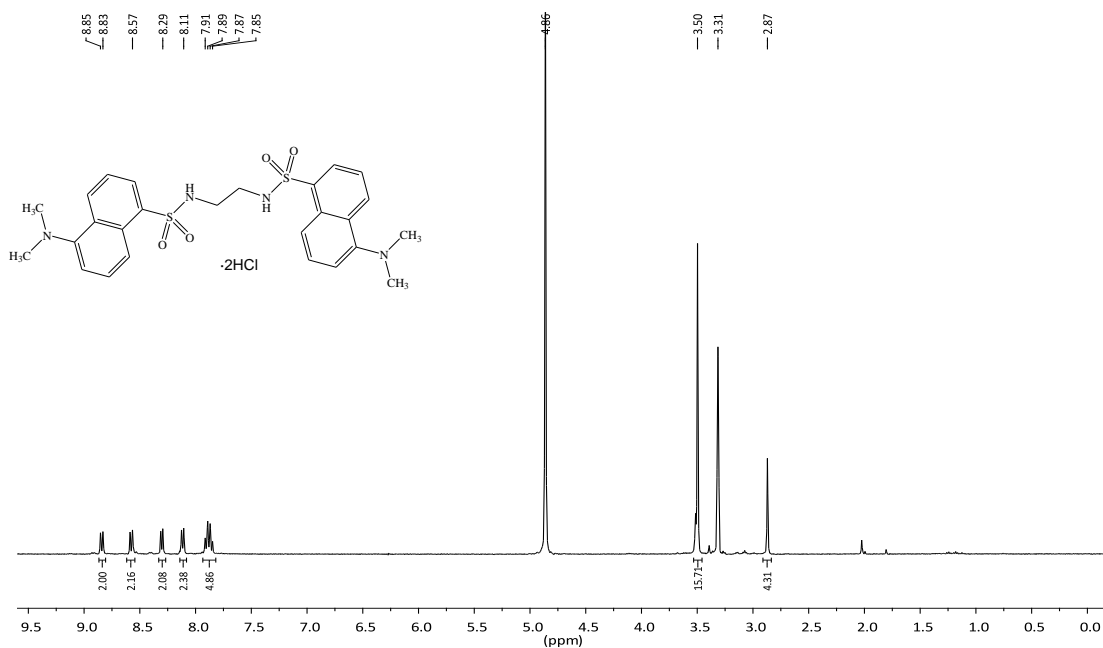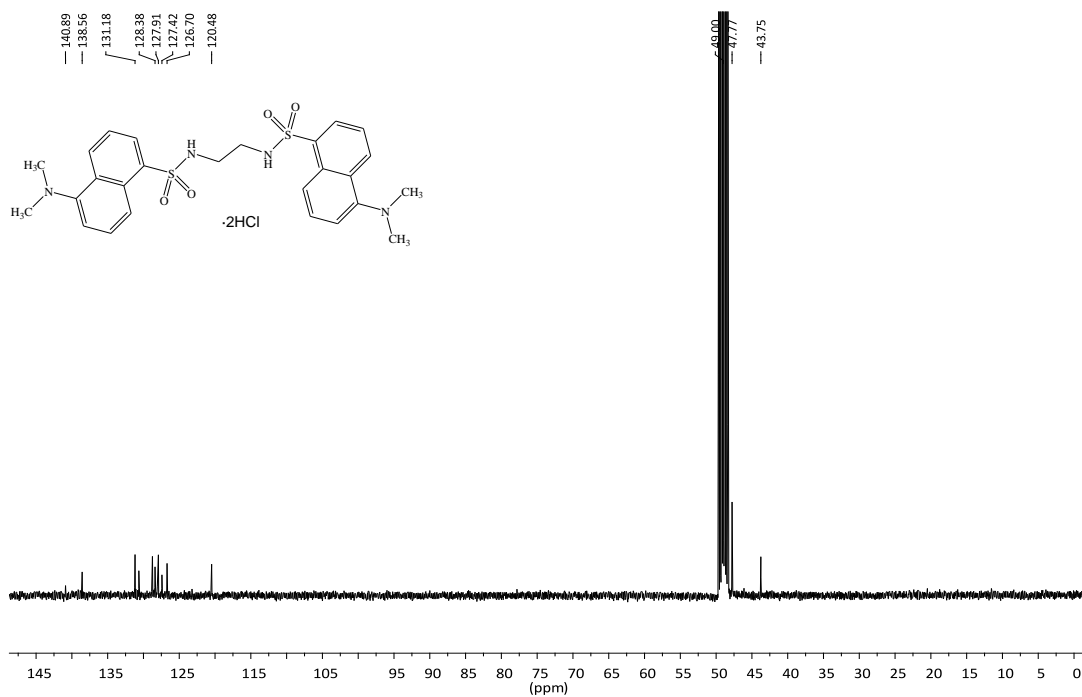



*N, N'*-(butane-1, 4-diyl)bis(5-(dimethylamino)naphthalene-1-sulfonamide) (D14)

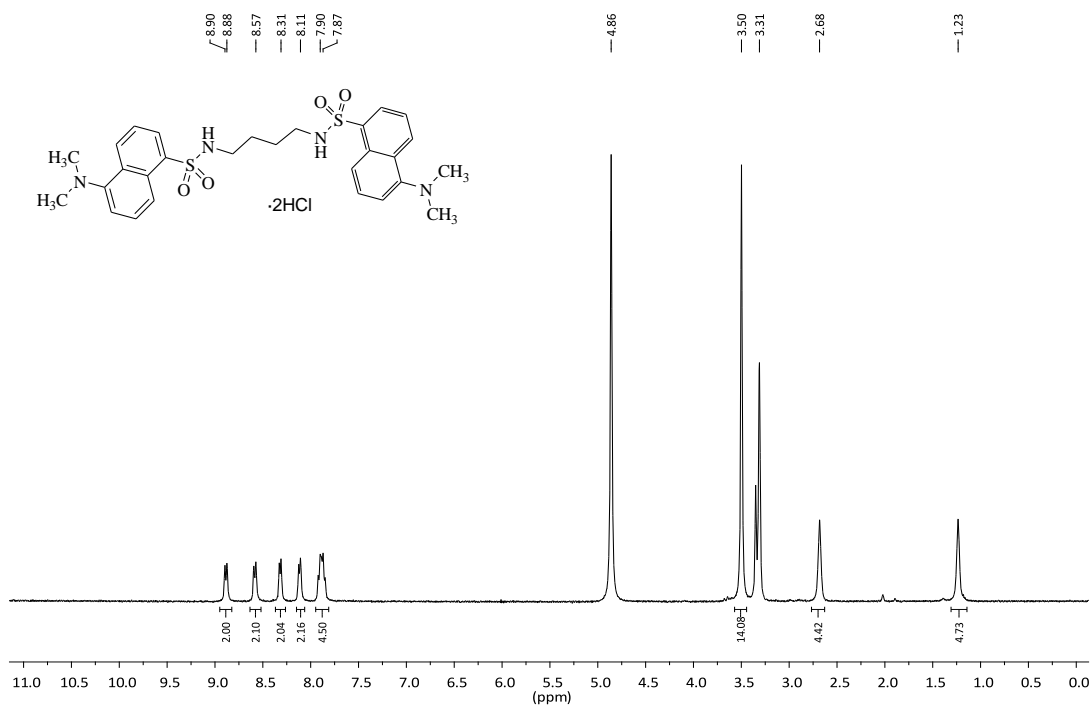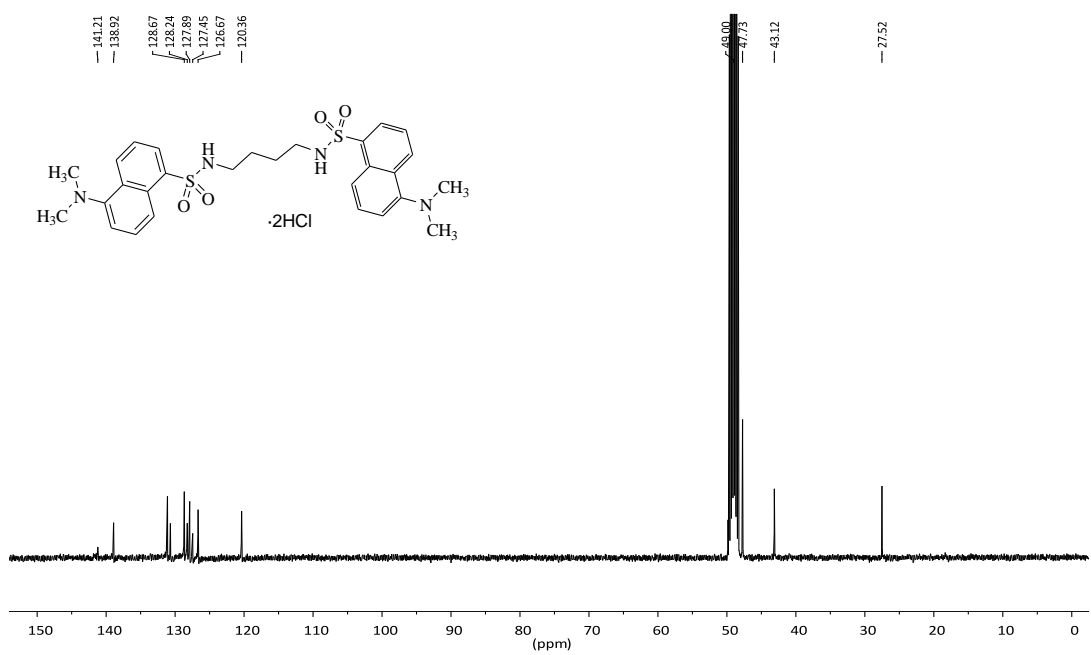

5-(Dimethylamino)-*N*-(2-(2-(8-(dimethylamino)naphthalene-2-sulfonamido)ethoxy)ethyl)naphthalene-1-sulfonamide (D15)

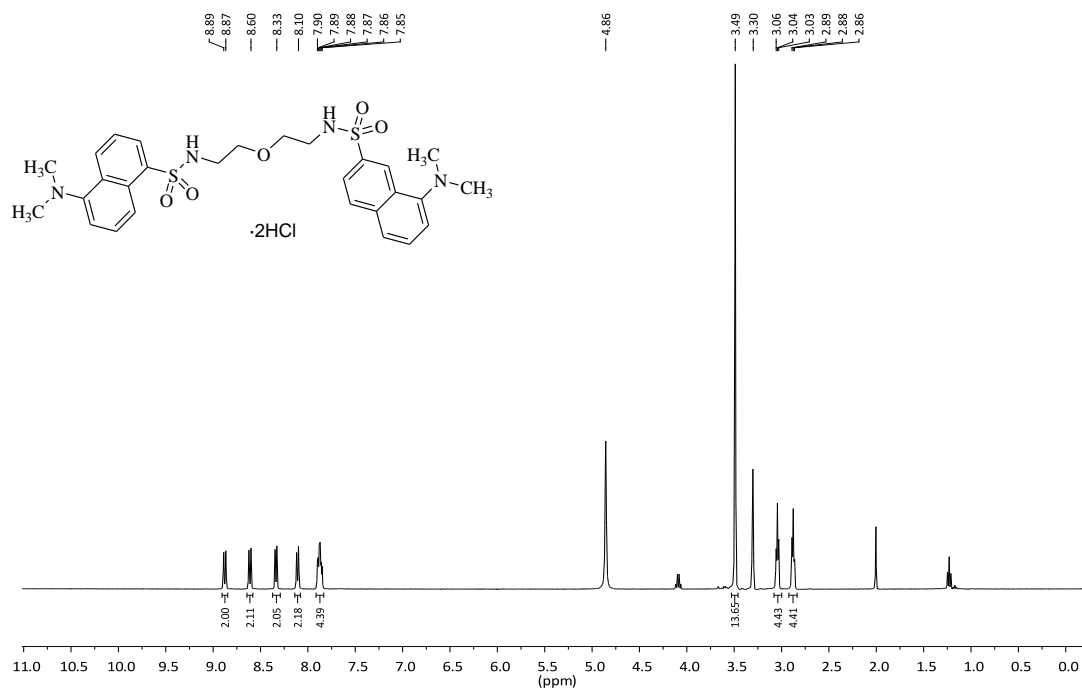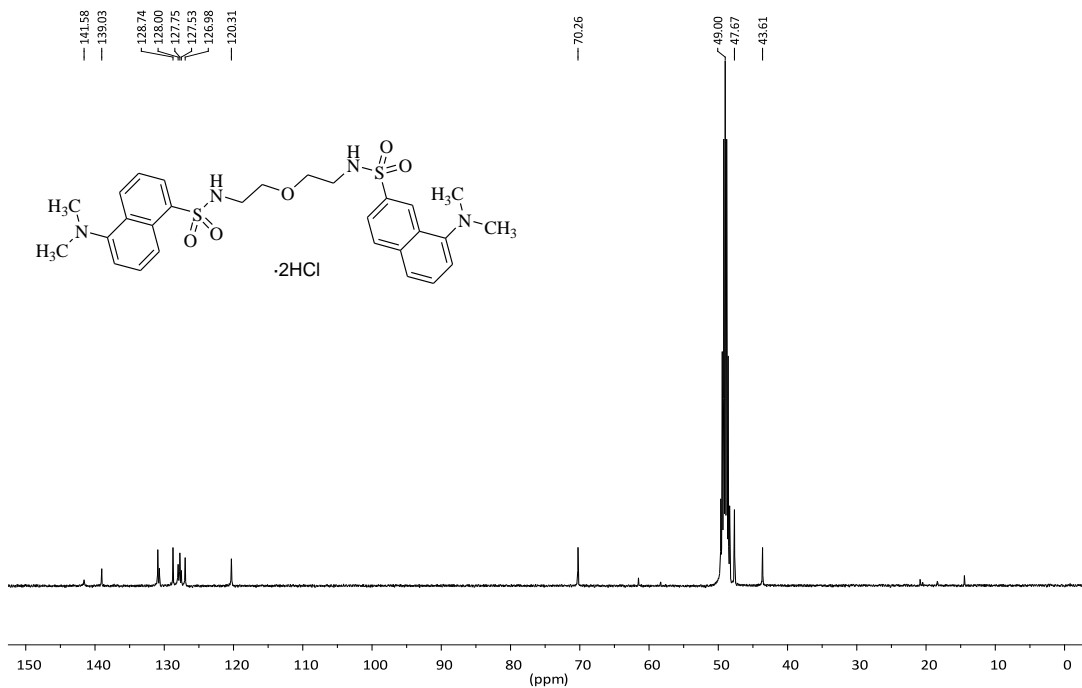

*N, N'*-(hexane-1, 6-diyl)bis(5-(dimethylamino)naphthalene-1-sulfonamide) (D16)

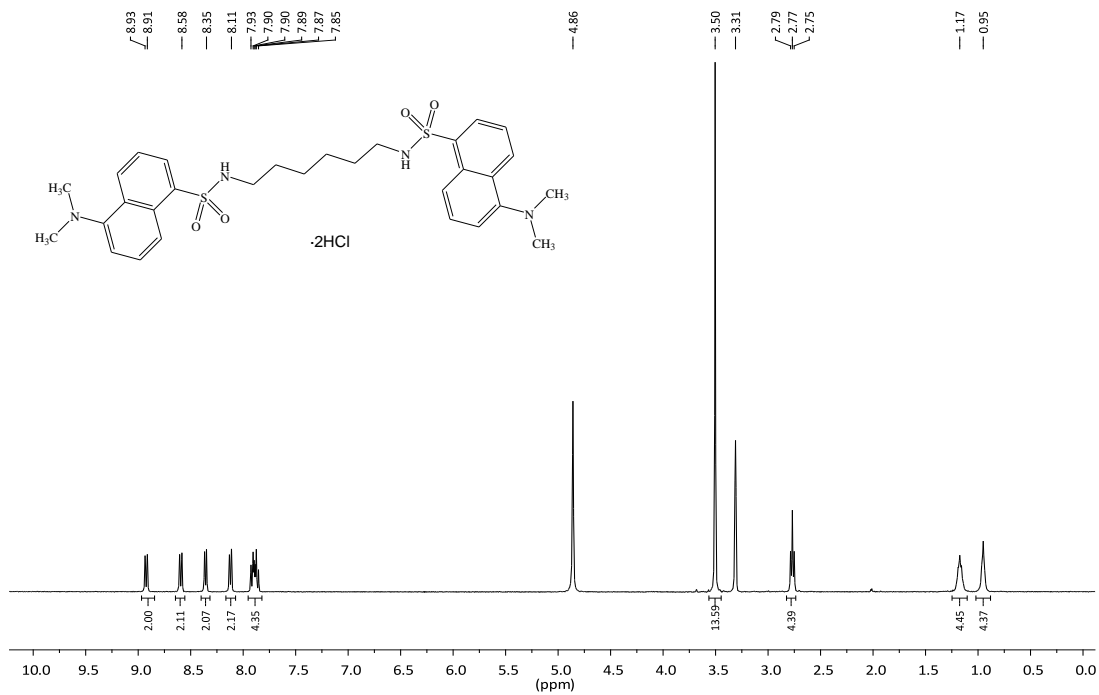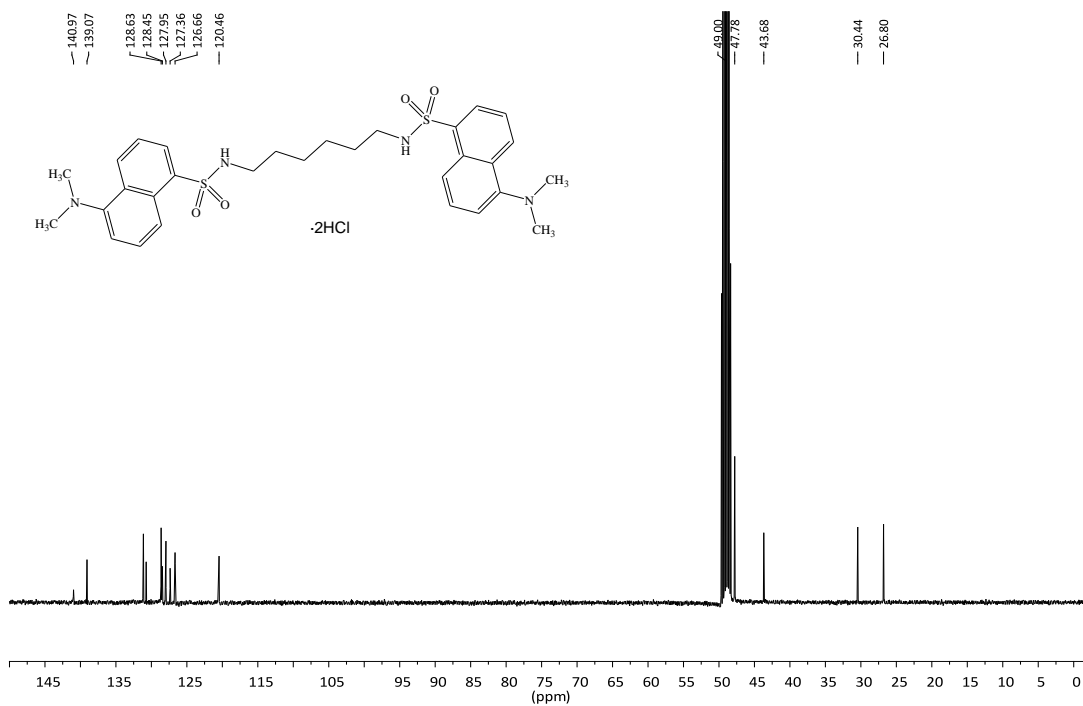

*N, N'*-((ethane-1,2-diylbis(oxy))bis(ethane-2,1-diyl))bis(5-(dimethylamino) naphthalene-1-sulfonamide) (D17)

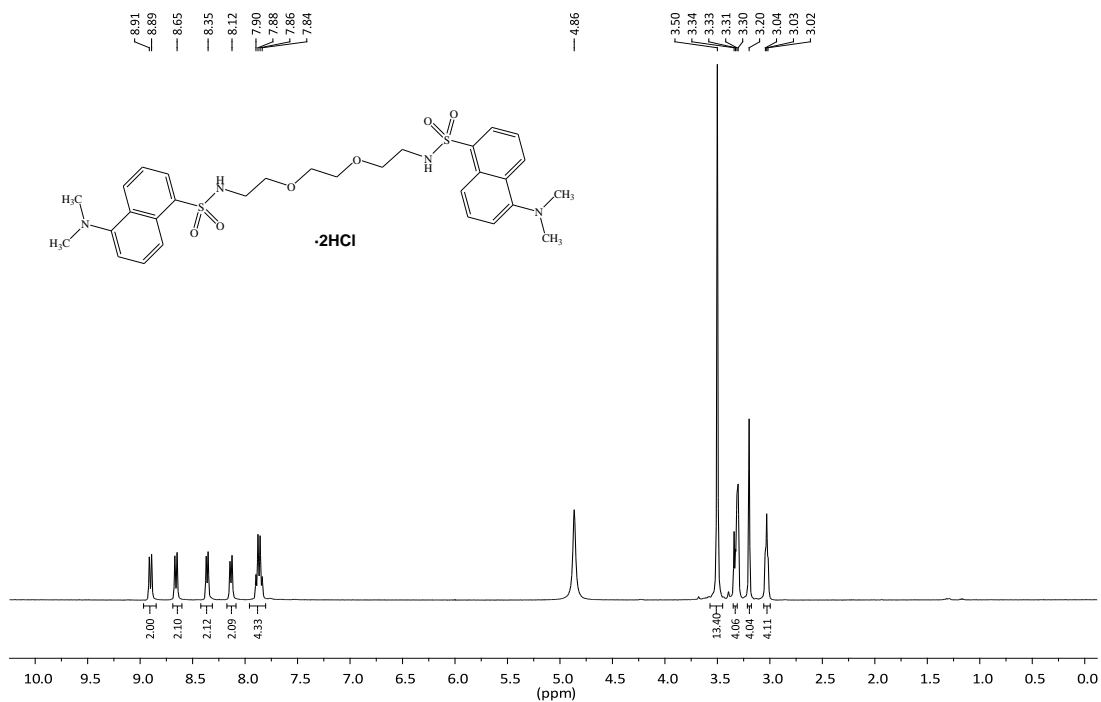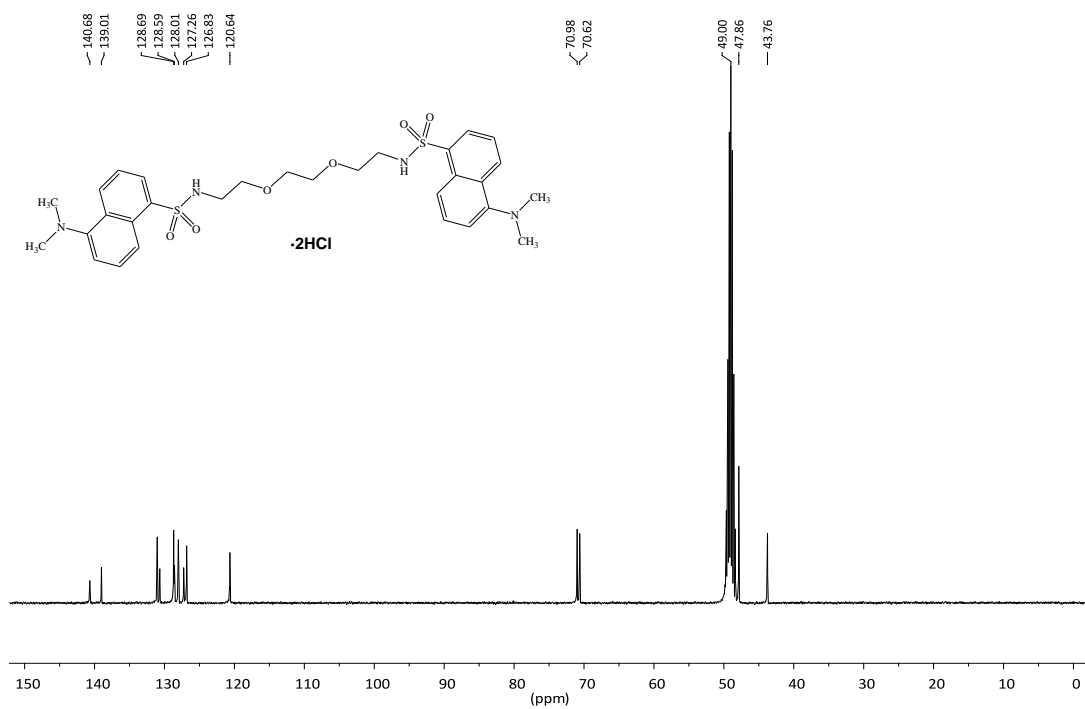

*N,N'*-(octane-1, 8-diyl)bis(5-(dimethylamino)naphthalene-1-sulfonamide) (D18)

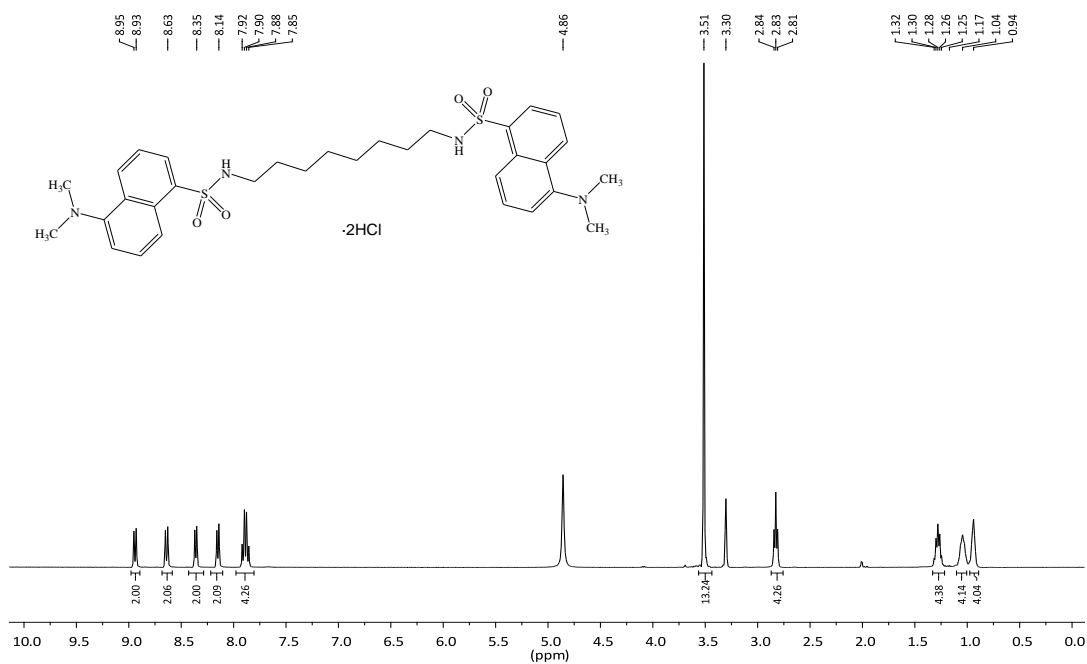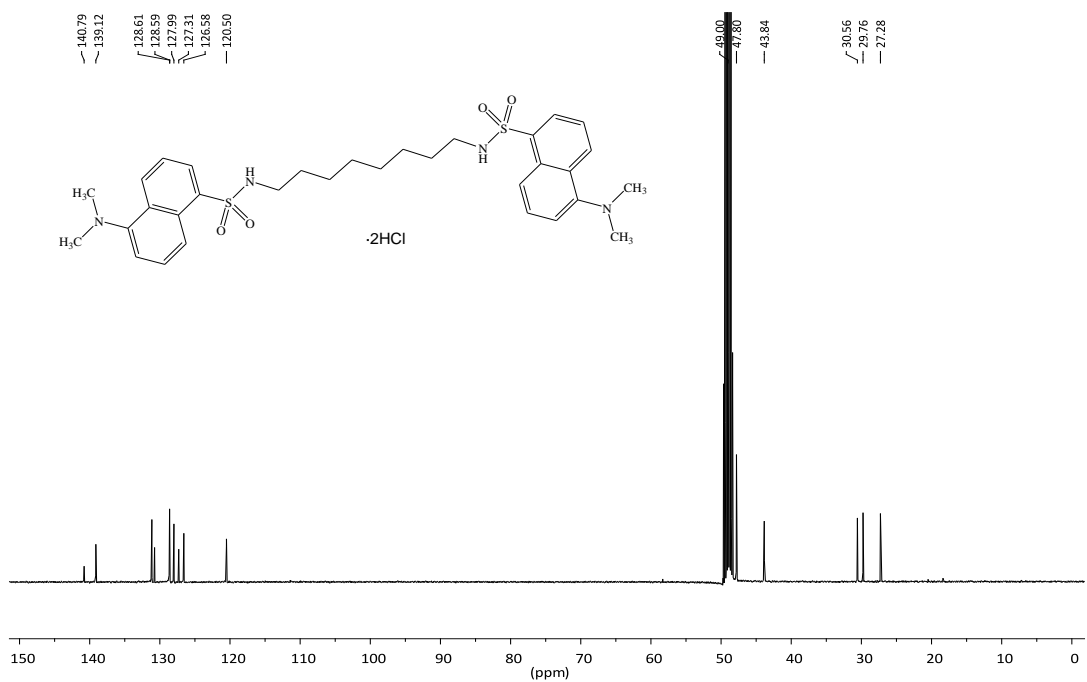

*N, N'*-(decane-1,10-diyl)bis(5-(dimethylamino)naphthalene-1-sulfonamide) (D19)

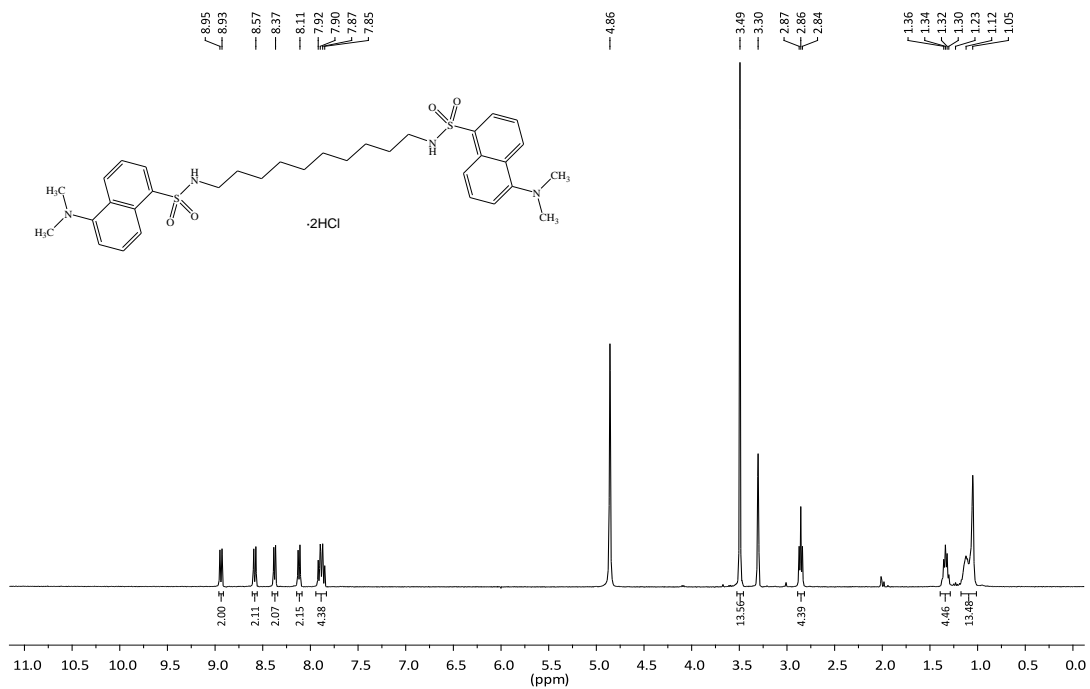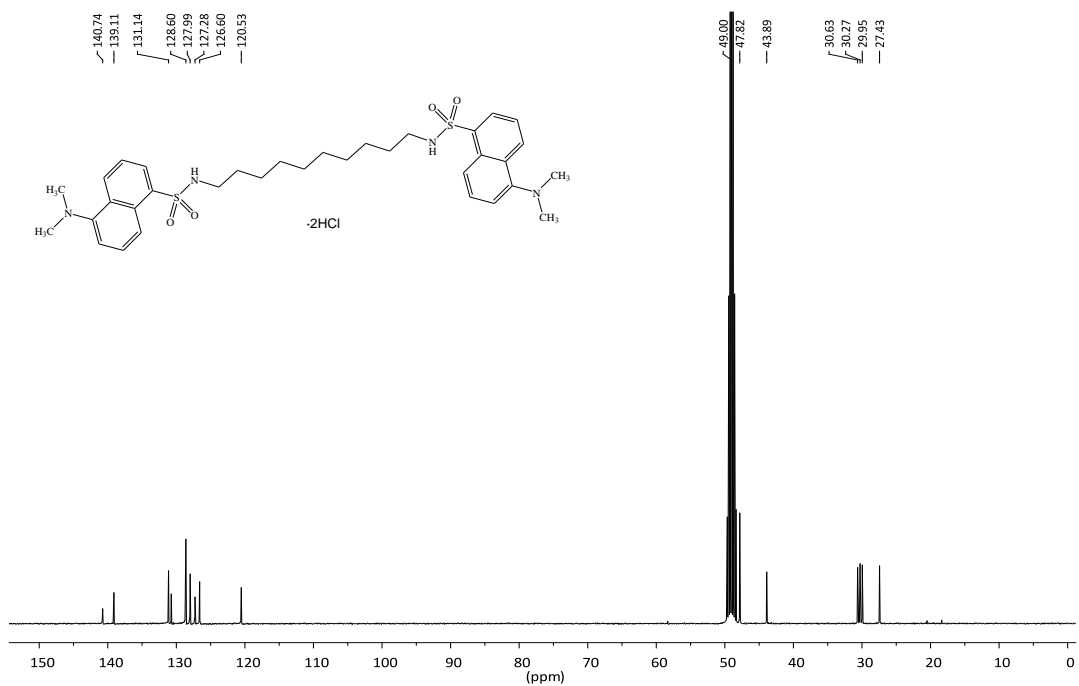



1. (a) Lee, J. S.; Kang, N. Y.; Kim, Y. K.; Samanta, A.; Feng, S.; Kim, H. K.; Vendrell, M.; Park, J. H.; Chang, Y. T., Synthesis of a BODIPY library and its application to the development of live cell glucagon imaging probe. *Journal of the American Chemical Society* **2009**, *131* (29), 10077-82;
2. (b) Michel, B. W.; Lippert, A. R.; Chang, C. J., A reaction-based fluorescent probe for selective imaging of carbon monoxide in living cells using a palladium-mediated carbonylation. *Journal of the American Chemical Society* **2012**, *134* (38), 15668-71.
